# Supplementary material
Source: PubMed Central journal article supplement (PMC4250310)

## Supporting Information

### **Deuteration and fluorination of 1,3-bis(2-phenylethyl)pyrimidine-2,4,6(1H,3H,5H)-trione to improve its pharmacokinetic properties**

Guoyao Xia,<sup>a</sup> Radhia Benmohamed,<sup>b</sup> Richard I. Morimoto,<sup>c</sup> Donald R. Kirsch,<sup>b</sup> and Richard B. Silverman<sup>a,d\*</sup>

<sup>a</sup>*Department of Chemistry, Northwestern University, Evanston, Illinois 60208-3113 USA,*

<sup>b</sup>*Cambria Pharmaceuticals, Cambridge, Massachusetts 02142 USA,* <sup>c</sup>*Department of Molecular Biosciences, Rice Institute for Biomedical Research, Northwestern University, Evanston, Illinois 60208-3500 USA,* and <sup>d</sup>*Department of Molecular Biosciences, Chemistry of Life Processes Institute, Center for Molecular Innovation and Drug Discovery, Northwestern University, Evanston, Illinois 60208-3113 USA.*

\* Address correspondence to the Department of Chemistry; Tel.: +1 847 491 5663; fax: +1 847 491 7713. E-mail address: [Agman@chem.northwestern.edu](mailto:Agman@chem.northwestern.edu)

## Table of Contents

|                                                                    |             |
|--------------------------------------------------------------------|-------------|
| <b>Experimental Section .....</b>                                  | <b>3-7</b>  |
| <b>Metabolites of Compound 1 .....</b>                             | <b>SP-1</b> |
| <b>Pharmacokinetic properties of F-protected PYT Analogs .....</b> | <b>SP-2</b> |
| <b>Pharmacokinetic Properties of Deuterated PYT Analogs .....</b>  | <b>SP-3</b> |

## Experimental Section

### General Procedures

All reactions were carried out in oven- or flame-dried glassware under an atmosphere of air unless otherwise noted. Except as otherwise indicated, all reactions were magnetically stirred and monitored by analytical thin-layer chromatography using Whatman pre-coated silica gel flexible plates (0.25 mm) with F<sub>254</sub> indicator or Merck pre-coated silica gel plates with F<sub>254</sub> indicator. Visualization was accomplished by UV light (256 nm) or by potassium permanganate and/or phosphomolybdic acid solution as an indicator. Flash column chromatography was performed using silica gel 60 (mesh 230-400) supplied by E. Merck. Yields refer to chromatographically and spectrographically pure compounds, unless otherwise noted. Commercial grade reagents and solvents were used without further purification except as indicated below. Tetrahydrofuran (THF) was distilled from sodium-benzophenone ketyl under an atmosphere of dry nitrogen.

<sup>1</sup>H NMR and <sup>13</sup>C NMR spectra were recorded on a Bruker Avance III (500 MHz <sup>1</sup>H, 125 MHz <sup>13</sup>C) with a DCH Cryo-Probe. Chemical shift values (δ) are reported in ppm relative to CDCl<sub>3</sub> [δ 7.26 ppm (<sup>1</sup>H), 77.16 ppm (<sup>13</sup>C)]. The proton spectra are reported as δ (multiplicity, number of protons). Multiplicities are indicated by s (singlet), d (doublet), t (triplet), q (quartet), p (pentet), h (heptet), m (multiplet), and br (broad). Elemental analyses were performed by Atlantic Microlab Inc., Norcross, GA. The C, H, and N analyses were performed by combustion using automatic analyzers, and all of the compounds analyzed showed >95% purity.

### Typical procedure for the synthesis of PYT analogues with deuterium on the carbon chains

ZrCl<sub>4</sub> (20 mmol) was slowly added to anhydrous THF (40 mL) under stirring at room temp under argon. To the mixture was added NaBH<sub>4</sub>/NaBD<sub>4</sub> (5 mmol) portionwise. Immediate gas evolution was observed upon mixing, and a cream colored suspension was obtained. A solution of

RCD<sub>2</sub>CN<sup>11</sup>/RCH<sub>2</sub>CN (4 mmol) in anhydrous THF (10 mL) was added to the mixture, which was stirred for 5 h at room temp. The reaction was quenched by the addition of water (30 mL) with ice cooling, and the mixture was then extracted with EtOAc (3 x 30 mL). The organic phase was collected and washed with 1 M HCl (3 x 30 mL). The aqueous phase was collected and concentrated *in vacuo* to afford the desired RCH<sub>2</sub>CD<sub>2</sub>NH<sub>3</sub><sup>+</sup>Cl<sup>-</sup>/RCD<sub>2</sub>CH<sub>2</sub>NH<sub>3</sub><sup>+</sup>Cl<sup>-</sup>/RCD<sub>2</sub>CD<sub>2</sub>NH<sub>3</sub><sup>+</sup>Cl<sup>-</sup> salts in 70-85% yield.

To the mixture of deuterated RCH<sub>2</sub>CH<sub>2</sub>NH<sub>3</sub><sup>+</sup>Cl<sup>-</sup> salt (3 mmol) and anhydrous THF (10 mL) was slowly added triphosgene (0.75 mmol) at -78 °C. The reaction mixture was stirred for 1 h and then warm up to room temp slowly. After being stirred at room temp overnight, the reaction mixture was partitioned between Et<sub>2</sub>O (50 mL) and H<sub>2</sub>O (30 mL). The organic layer was washed with water and brine twice and dried over Na<sub>2</sub>SO<sub>4</sub>. After removal of solvent *in vacuo*, the crude product was purified by silica gel chromatography to afford deuterated urea in 70-80% yield.

To a solution of the deuterated urea (1 mmol) in CH<sub>2</sub>Cl<sub>2</sub> (5 mL), was added malonyl dichloride (1 mmol) slowly. The reaction mixture was stirred for 2 h at room temp and then partitioned between EtOAc (20 mL) and H<sub>2</sub>O (10 mL). The organic layer was washed with water and brine twice and dried over Na<sub>2</sub>SO<sub>4</sub>. After removal of solvent *in vacuo*, the crude product was purified by silica gel chromatography to afford the deuterated PYT compound in 85-90% yield.

**1,3-Bis(1,1-d<sub>2</sub>-2-phenylethyl)pyrimidine-2,4,6(1H,3H,5H)-trione (2).** <sup>1</sup>H NMR (500 MHz, CDCl<sub>3</sub>) δ 7.31-7.23 (m, 10 H), 3.58 (s, 2 H), 2.86 (s, 4 H); <sup>13</sup>C NMR (125 MHz, CDCl<sub>3</sub>) δ 164.1, 151.0, 137.7, 128.9, 128.5, 126.7, 39.5, 33.7. Isotopic purity: >98 atom % D. EC<sub>50</sub> = 1.70 μM.

**1,3-Bis(2,2-d<sub>2</sub>-2-phenylethyl)pyrimidine-2,4,6(1H,3H,5H)-trione (3).** <sup>1</sup>H NMR (500 MHz, CDCl<sub>3</sub>) δ 7.31-7.23 (m, 10 H), 4.08 (s, 4 H), 3.58 (s, 2 H); <sup>13</sup>C NMR (125 MHz, CDCl<sub>3</sub>) δ 164.1, 151.0, 137.7, 128.9, 128.5, 126.7, 42.9, 39.5. Isotopic purity: >98 atom % D. EC<sub>50</sub> = 1.57 μM.

**1,3-Bis(1,1,2,2-d<sub>4</sub>-2-phenylethyl)pyrimidine-2,4,6(1H,3H,5H)-trione (4).** <sup>1</sup>H NMR (500 MHz, CDCl<sub>3</sub>) δ 7.31-7.23 (m, 10 H), 3.58 (s, 2 H); <sup>13</sup>C NMR (125 MHz, CDCl<sub>3</sub>) δ 164.1, 151.0, 137.7, 128.9, 128.5, 126.7, 39.5. Isotopic purity: >98 atom % D. EC<sub>50</sub> = 1.05 μM.

#### **Typical procedure for the synthesis of the PYT analogs with fluorine on the carbon chains**

To a plastic flask containing RPhCOCH<sub>2</sub>Br (10 mmol) was added DAST (10.5 mmol) at 0 °C with stirring, and the mixture was stirred at room temp for 7 days. The reaction mixture was partitioned between EtOAc (300 mL) and saturated NaHCO<sub>3</sub> (300 mL). The organic layer was washed with brine twice and dried over Na<sub>2</sub>SO<sub>4</sub>. After removal of solvent *in vacuo*, the crude RPhCF<sub>2</sub>CH<sub>2</sub>Br residue was dissolved in anhydrous DMSO (15 mL), and to this solution was added NaN<sub>3</sub> (15 mmol). After being stirred at 110 °C overnight, the reaction mixture was cooled to room temp and partitioned between EtOAc (300 mL) and H<sub>2</sub>O (200 mL). The organic layer was washed with brine twice and dried over Na<sub>2</sub>SO<sub>4</sub>. After removal of solvent *in vacuo*, the crude RPhCF<sub>2</sub>CH<sub>2</sub>N<sub>3</sub> was dissolved in EtOH (30 mL). To this solution was added 1 N HCl (15 mL) and Pd(OH)<sub>2</sub>/C (20%, 200 mg). The reaction mixture was allowed to stir under one atmosphere of H<sub>2</sub> for 2 days. The Pd catalyst was removed by filtration, and the solvent was evaporated. The resulting solid was dried under vacuum overnight to afford RPhCF<sub>2</sub>CH<sub>2</sub>NH<sub>3</sub><sup>+</sup>Cl<sup>-</sup> in 50-80% overall yield.

To the mixture of RPhCF<sub>2</sub>CH<sub>2</sub>NH<sub>3</sub><sup>+</sup>Cl<sup>-</sup> (6 mmol) and anhydrous THF (20 mL) was slowly added triphosgene (1.5 mmol) at -78 °C. The reaction mixture was stirred for 1 h and then warmed to room temp slowly. After being stirred at room temp overnight, the reaction mixture was partitioned between Et<sub>2</sub>O (100 mL) and H<sub>2</sub>O (50 mL). The organic layer was washed with water and brine twice and dried over Na<sub>2</sub>SO<sub>4</sub>. After removal of solvent *in vacuo*, the crude product was purified by silica gel chromatography to afford RPhCF<sub>2</sub>CH<sub>2</sub>-urea in 60-70% yield.

To the solution of RPhCF<sub>2</sub>CH<sub>2</sub>-urea (2 mmol) in CH<sub>2</sub>Cl<sub>2</sub> (10 mL), was added malonyl dichloride (2 mmol) slowly. The reaction mixture was stirred for 2 h at room temp and then partitioned between EtOAc (40 mL) and H<sub>2</sub>O (20 mL). The organic layer was washed with water and brine twice and dried over Na<sub>2</sub>SO<sub>4</sub>. After removal of solvent *in vacuo*, the crude product was purified by silica gel chromatography to afford the fluorinated PYT compound in 85-90% yield.

**1,3-Bis(2,2-difluoro-2-phenylethyl)pyrimidine-2,4,6(1H,3H,5H)-trione (5).** <sup>1</sup>H NMR (500 MHz, CDCl<sub>3</sub>) δ 7.57 (m, 4 H), 7.48 (m, 6 H), 4.57 (t, 4 H), 3.79 (s, 2 H); <sup>13</sup>C NMR (125 MHz, CDCl<sub>3</sub>) δ 163.8, 150.9, 134.7, 134.5, 134.3, 130.8, 128.8, 125.4, 125.3, 122.0, 120.0, 118.0, 46.9, 46.7, 46.5, 39.7. Elemental Analysis: Comb. Anal. (C<sub>20</sub>H<sub>16</sub>F<sub>4</sub>N<sub>2</sub>O<sub>3</sub>), Calculated: C, 58.83; H, 3.95; N, 6.88; Found: C, 58.67; H, 3.86; N, 6.68; Purity: >95%. EC<sub>50</sub> = 2.19 μM.

**1,3-Bis(2,2-difluoro-2-(4-fluorophenyl)ethyl)pyrimidine-2,4,6(1H,3H,5H)-trione (6).** <sup>1</sup>H NMR (500 MHz, CDCl<sub>3</sub>) δ 7.56 (m, 4 H), 7.15 (m, 4 H), 4.55 (t, 4 H), 3.81 (s, 2 H); <sup>13</sup>C NMR (125 MHz, CDCl<sub>3</sub>) δ 165.1, 163.7, 163.1, 150.9, 130.7, 130.5, 130.3, 127.6, 121.6, 119.7, 117.7, 116.1, 115.9, 46.8, 46.6, 46.4, 39.6. Elemental Analysis: Comb. Anal. (C<sub>20</sub>H<sub>14</sub>F<sub>6</sub>N<sub>2</sub>O<sub>3</sub>), Calculated: C, 54.06; H, 3.18; N, 6.30; Found: C, 53.99; H, 3.44; N, 6.10; Purity: >95%. EC<sub>50</sub> = 3.50 μM.

**11,3-Bis(2-(3-chlorophenyl)-2,2-difluoroethyl)pyrimidine-2,4,6(1H,3H,5H)-trione (7).** <sup>1</sup>H NMR (500 MHz, CDCl<sub>3</sub>) δ 7.57-7.36 (m, 8 H), 4.55 (t, 4 H), 3.83 (s, 2 H); <sup>13</sup>C NMR (125 MHz, CDCl<sub>3</sub>) δ 163.7, 156.5, 150.9, 136.3, 135.0, 131.1, 130.3, 125.7, 123.6, 121.2, 119.2, 117.2, 46.7, 46.5, 46.2, 39.6. Elemental Analysis: Comb. Anal. (C<sub>20</sub>H<sub>14</sub>Cl<sub>2</sub>F<sub>4</sub>N<sub>2</sub>O<sub>3</sub>), Calculated: C, 50.33; H, 2.96; N, 5.87; Found: C, 50.43; H, 3.07; N, 5.95; Purity: >95%. EC<sub>50</sub> = 2.69 μM.

**1,3-Bis(2,2-difluoro-2-(3-fluorophenyl)ethyl)pyrimidine-2,4,6(1H,3H,5H)-trione (8).** <sup>1</sup>H NMR (500 MHz, CDCl<sub>3</sub>) δ 7.46-7.05 (m, 8 H), 4.60 (t, 4 H), 3.83 (s, 2 H); <sup>13</sup>C NMR (125 MHz,

CDCl<sub>3</sub>) δ 164.6, 163.8, 161.8, 151.0, 140.1, 130.1, 124.5, 115.9, 115.7, 113.8, 113.6, 113.4, 46.8, 46.6, 46.4, 39.7. EC<sub>50</sub> = 2.54 μM.

### **Mutant SOD1-induced cytotoxicity protection assay**

Cells were seeded at 15,000 cells/well in 96-well plates and incubated 24 h prior to compound addition. Compounds were assayed in twelve-point dose response experiments to determine potency and efficacy. The highest compound concentration tested was 32 μM, which was decreased by one-half with each subsequent dose. After 24 h incubation with the compounds, MG132 was added at a final concentration of 100 nM. MG132 is a well-characterized proteasome inhibitor, which would be expected to enhance the appearance of protein aggregation by blocking the proteosomal clearance of aggregated proteins. Cell viability was measured 48 h later using the fluorescent viability probe, Calcein-AM (Molecular Probes). Briefly, cells were washed twice with PBS, Calcein-AM was added at a final concentration of 1 μM for 20 min at room temperature, and fluorescence intensity was read in a POLARstar fluorescence plate reader (BMG). Fluorescence data were coupled with compound structural data, then stored and analyzed using the CambridgeSoft Chemoffice Enterprise Ultra software package.

### **In vitro ADME studies**

In vitro ADME properties of PYT compounds were tested at Apredica, Inc. (Watertown, MA), a contract research organization.

## Supporting Information - SP-1

| Compound | Apredica ID |
|----------|-------------|
| 1        | CAM-020-05  |
| 9        | CAM-020-02  |
| 10       | CAM-020-03  |
| 11       | CAM-020-04  |



## TABLE OF CONTENTS

|       |                                                                       |    |
|-------|-----------------------------------------------------------------------|----|
| 1     | Objective .....                                                       | 3  |
| 1.1   | Regulatory Guidelines .....                                           | 3  |
| 2     | Test Articles .....                                                   | 3  |
| 3     | Test Methods .....                                                    | 4  |
| 3.1   | Analytical Methods .....                                              | 4  |
| 3.1.1 | <i>Method development</i> .....                                       | 4  |
| 3.1.2 | <i>Analysis</i> .....                                                 | 4  |
| 3.2   | In vitro ADME-Tox Experimental Conditions .....                       | 4  |
| 3.2.1 | <i>PBS solubility experimental conditions</i> .....                   | 4  |
| 3.2.2 | <i>Microsomal stability experimental conditions</i> .....             | 4  |
| 3.2.3 | <i>Plasma stability experimental conditions</i> .....                 | 5  |
| 3.2.4 | <i>PBS stability experimental conditions</i> .....                    | 5  |
| 4     | Results.....                                                          | 6  |
| 4.1   | Analytical .....                                                      | 6  |
| 4.1.1 | <i>Method development</i> .....                                       | 6  |
| 4.2   | In vitro ADME-Tox Summary.....                                        | 7  |
| 4.2.1 | <i>PBS express solubility summary</i> .....                           | 7  |
| 4.2.2 | <i>Microsomal intrinsic clearance summary</i> .....                   | 7  |
| 4.2.3 | <i>Plasma half-life summary</i> .....                                 | 8  |
| 4.2.4 | <i>Buffer half-life summary</i> .....                                 | 8  |
| 4.3   | In vitro ADME-Tox Individual Data .....                               | 9  |
| 4.3.1 | <i>PBS express solubility individual data</i> .....                   | 9  |
| 4.3.2 | <i>Microsomal intrinsic clearance individual data</i> .....           | 14 |
| 4.3.3 | <i>Plasma half-life individual data</i> .....                         | 19 |
| 4.3.4 | <i>Buffer half-life individual data</i> .....                         | 24 |
| 5     | References .....                                                      | 29 |
| 6     | Storage and Retention of Records .....                                | 30 |
| 7     | Appendices .....                                                      | 31 |
| 7.1   | Appendix A. Standard Apredica Methods .....                           | 31 |
| 7.2   | Appendix B. Sample Spectra and Chromatograms of the Test Agents ..... | 32 |

# 1 Objective

The objective of this study was to evaluate the *in vitro* ADME properties of the test agents.

## 1.1 Regulatory Guidelines

This study was not conducted under US FDA Good Laboratory Practice Regulations (GLPs). Standard operating procedures of Apredica were used throughout the study.

# 2 Test Articles

| Apredica ID | Client ID  | Physical Form | Submitted FW | Parent MW | Stock solutions |
|-------------|------------|---------------|--------------|-----------|-----------------|
| CAM-020-01  | CMB-087618 | solid         |              | 408       | 10 mM DMSO      |
| CAM-020-02  | CMB-087649 | solid         |              | 344       | 10 mM DMSO      |
| CAM-020-03  | CMB-087647 | solid         |              | 340       | 10 mM DMSO      |
| CAM-020-04  | CMB-087648 | solid         |              | 340       | 10 mM DMSO      |
| CAM-020-05  | CMB-021805 | solid         |              | 336       | 10 mM DMSO      |

Test agent powders were stored at -20 °C. Stock solutions were stored at -20 °C.

### 3 Test Methods

Testing was performed at Apredica in Watertown, MA.

#### 3.1 Analytical Methods

##### 3.1.1 Method development

The signal was optimized for each compound by ESI positive or negative ionization mode. A MS2 scan was used to identify the precursor ion and a product ion analysis was used to identify the best fragment for analysis and to optimize the collision energy. An ionization ranking was assigned indicating the compound's ease of ionization.

##### 3.1.2 Analysis

Samples were analyzed by LC/MS/MS using either an Agilent 6410 mass spectrometer coupled with an Agilent 1200 HPLC and a CTC PAL chilled autosampler, all controlled by MassHunter software (Agilent), or an ABI2000 mass spectrometer coupled with an Agilent 1100 HPLC and a CTC PAL chilled autosampler, all controlled by Analyst software (ABI). After separation on a C18 reverse phase HPLC column (Agilent, Waters, or equivalent) using an acetonitrile-water gradient system, peaks were analyzed by mass spectrometry (MS) using ESI ionization in MRM mode.

#### 3.2 In vitro ADME-Tox Experimental Conditions

Additional protocol details are given in Appendix A.

##### 3.2.1 PBS solubility experimental conditions

| Apredica ID | Client ID  | Test conc                                           | Medium | Incubation          | Ref. comp.                          | Analytical method |
|-------------|------------|-----------------------------------------------------|--------|---------------------|-------------------------------------|-------------------|
| CAM-020-01  | CMB-087618 | 500, 250, 125, 62.5, 31.3, 15.6, 7.81, 3.91 $\mu$ M | PBS    | 45 min, ON<br>37 °C | reserpine<br>tamoxifen<br>verapamil | UV/Vis            |
| CAM-020-02  | CMB-087649 |                                                     |        |                     |                                     |                   |
| CAM-020-03  | CMB-087647 |                                                     |        |                     |                                     |                   |
| CAM-020-04  | CMB-087648 |                                                     |        |                     |                                     |                   |
| CAM-020-05  | CMB-021805 |                                                     |        |                     |                                     |                   |

##### 3.2.2 Microsomal stability experimental conditions

| Apredica ID | Client ID  | Test conc. | Microsome source | Protein conc. | Incubation                     | Ref. comp.            | Analytical method |
|-------------|------------|------------|------------------|---------------|--------------------------------|-----------------------|-------------------|
| CAM-020-01  | CMB-087618 | 1 $\mu$ M  | human, mouse     | 0.3 mg/mL     | 0, 10, 20, 40, 60 min<br>37 °C | verapamil<br>warfarin | LC/MS/MS          |
| CAM-020-02  | CMB-087649 |            |                  |               |                                |                       |                   |
| CAM-020-03  | CMB-087647 |            |                  |               |                                |                       |                   |
| CAM-020-04  | CMB-087648 |            |                  |               |                                |                       |                   |
| CAM-020-05  | CMB-021805 |            |                  |               |                                |                       |                   |

### 3.2.3 Plasma stability experimental conditions

| Apredica ID | Client ID  | Test conc. | Plasma source | Incubation                           | Reference compounds | Analytical method |
|-------------|------------|------------|---------------|--------------------------------------|---------------------|-------------------|
| CAM-020-01  | CMB-087618 | 5 $\mu$ M  | mouse         | 0, 10,<br>20, 40,<br>60 min<br>37 °C | propranolol         | LC/MS/MS          |
| CAM-020-02  | CMB-087649 |            |               |                                      |                     |                   |
| CAM-020-03  | CMB-087647 |            |               |                                      |                     |                   |
| CAM-020-04  | CMB-087648 |            |               |                                      |                     |                   |
| CAM-020-05  | CMB-021805 |            |               |                                      |                     |                   |

### 3.2.4 PBS stability experimental conditions

| Apredica ID | Client ID  | Test conc. | Medium           | Incubation                           | Ref. comp. | Analytical method |
|-------------|------------|------------|------------------|--------------------------------------|------------|-------------------|
| CAM-020-01  | CMB-087618 | 5 $\mu$ M  | PBS <sup>a</sup> | 0, 10,<br>20, 40,<br>60 min<br>37 °C | warfarin   | LC/MS/MS          |
| CAM-020-02  | CMB-087649 |            |                  |                                      |            |                   |
| CAM-020-03  | CMB-087647 |            |                  |                                      |            |                   |
| CAM-020-04  | CMB-087648 |            |                  |                                      |            |                   |
| CAM-020-05  | CMB-021805 |            |                  |                                      |            |                   |

<sup>a</sup>PBS is Ca<sup>2+</sup>, Mg<sup>2+</sup>-free phosphate-buffered saline, pH 7.2.

## 4 Results

### 4.1 Analytical

#### 4.1.1 Method development

| Client ID         | MW  | Polarization | Precursor m/z | Product m/z | Collision energy (V) | Ionization classification <sup>a</sup> |
|-------------------|-----|--------------|---------------|-------------|----------------------|----------------------------------------|
| <b>CMB-087618</b> | 408 | neg          | 407.1         | 136.1       | 40                   | 1                                      |
| <b>CMB-087649</b> | 344 | neg          | 343.2         | 236.1       | 22                   | 1                                      |
| <b>CMB-087647</b> | 340 | neg          | 339.3         | 233.1       | 18                   | 1                                      |
| <b>CMB-087648</b> | 340 | neg          | 339.2         | 234.1       | 18                   | 1                                      |
| <b>CMB-021805</b> | 336 | neg          | 335           | 127         | 26                   | 1                                      |

<sup>a</sup>Ionization classification:

1 = Highly ionizable

2 = Intermediately ionizable

3 = Poorly ionizable

The product ion spectrum and a sample chromatogram are shown in Appendix B.

## 4.2 In vitro ADME-Tox Summary

### 4.2.1 PBS express solubility summary

| Client ID  | Medium | Solubility limit ( $\mu\text{M}$ ) <sup>a</sup> |       | comment          |
|------------|--------|-------------------------------------------------|-------|------------------|
|            |        | 45 min                                          | 16 hr |                  |
| Verapamil  | PBS    | >=500                                           | >=500 | negative control |
| Reserpine  | PBS    | 31.3                                            | 31.3  | positive control |
| Tamoxifen  | PBS    | 15.6                                            | 31.3  | positive control |
| CMB-021805 | PBS    | 15.6                                            | 31.25 |                  |
| CMB-087618 | PBS    | 125.0                                           | 125.0 |                  |
| CMB-087647 | PBS    | 31.3                                            | 31.3  |                  |
| CMB-087648 | PBS    | 31.3                                            | 31.3  |                  |
| CMB-087649 | PBS    | 62.5                                            | 62.5  |                  |

<sup>a</sup>Solubility limit is highest concentration with no detectable precipitate.

### 4.2.2 Microsomal intrinsic clearance summary

| Client ID  | test conc ( $\mu\text{M}$ ) | test species | NADPH-dependent $\text{CL}_{\text{int}}^{\text{a}}$ ( $\mu\text{l min}^{-1} \text{mg}^{-1}$ ) | NADPH-dependent $\text{T}_{1/2}^{\text{b}}$ (min) | NADPH-free $\text{CL}_{\text{int}}^{\text{a}}$ ( $\mu\text{l min}^{-1} \text{mg}^{-1}$ ) | NADPH-free $\text{T}_{1/2}^{\text{b}}$ (min) | comment                    |
|------------|-----------------------------|--------------|-----------------------------------------------------------------------------------------------|---------------------------------------------------|------------------------------------------------------------------------------------------|----------------------------------------------|----------------------------|
| Verapamil  | 1.0                         | Human        | 135.5                                                                                         | 17.0                                              | 2.4                                                                                      | >180                                         | highly metabolized control |
| Verapamil  | 1.0                         | Mouse        | >1000                                                                                         | 5.5                                               | 4.8                                                                                      | >180                                         | highly metabolized control |
| Warfarin   | 1.0                         | Human        | 0.0                                                                                           | >180                                              | 0.9                                                                                      | >180                                         | poorly metabolized control |
| Warfarin   | 1.0                         | Mouse        | 8.1                                                                                           | >180                                              | 0.0                                                                                      | >180                                         | poorly metabolized control |
| CMB-021805 | 1.0                         | Human        | 36                                                                                            | 64                                                | 9                                                                                        | >180                                         |                            |
| CMB-021805 | 1.0                         | Mouse        | 145                                                                                           | 16                                                | 14                                                                                       | 167                                          |                            |
| CMB-087618 | 1.0                         | Human        | 49                                                                                            | 48                                                | 17                                                                                       | 132                                          |                            |
| CMB-087618 | 1.0                         | Mouse        | 272                                                                                           | 9                                                 | 30                                                                                       | 76                                           |                            |
| CMB-087647 | 1.0                         | Human        | 31                                                                                            | 75                                                | 5                                                                                        | >180                                         |                            |
| CMB-087647 | 1.0                         | Mouse        | 147                                                                                           | 16                                                | 9                                                                                        | >180                                         |                            |

|                   |     |       |     |    |    |      |
|-------------------|-----|-------|-----|----|----|------|
| <b>CMB-087648</b> | 1.0 | Human | 36  | 64 | 6  | >180 |
| <b>CMB-087648</b> | 1.0 | Mouse | 153 | 15 | 14 | 171  |
| <b>CMB-087649</b> | 1.0 | Human | 36  | 64 | 8  | >180 |
| <b>CMB-087649</b> | 1.0 | Mouse | 163 | 14 | 21 | 109  |

<sup>a</sup>Microsomal Intrinsic Clearance<sup>b</sup>Half-life

### 4.2.3 Plasma half-life summary

| Client ID          | test conc (µM) | test species | Plasma T <sub>1/2</sub> <sup>a</sup> (min) | Fraction remaining, last time point (%) | comment                |
|--------------------|----------------|--------------|--------------------------------------------|-----------------------------------------|------------------------|
| <b>Propranolol</b> | 5.0            | Mouse Plasma | 11.4                                       | 0.6%                                    | metabolized control    |
| <b>Warfarin</b>    | 5.0            | Mouse Plasma | >60                                        | 85.9%                                   | nonmetabolized control |
| <b>CMB-021805</b>  | 5.0            | Mouse Plasma | 63.5                                       | 52.9%                                   |                        |
| <b>CMB-087618</b>  | 5.0            | Mouse Plasma | 81.2                                       | 60.4%                                   |                        |
| <b>CMB-087647</b>  | 5.0            | Mouse Plasma | 49.8                                       | 39.4%                                   |                        |
| <b>CMB-087648</b>  | 1.0            | Mouse Plasma | 54.0                                       | 46.0%                                   |                        |
| <b>CMB-087649</b>  | 5.0            | Mouse Plasma | 49.4                                       | 39.1%                                   |                        |

<sup>a</sup>Half-life

### 4.2.4 Buffer half-life summary

| Client ID         | Test conc (µM) | Medium           | Buffer T <sub>1/2</sub> <sup>a</sup> (min) | Fraction remaining, last time point (%) | comment        |
|-------------------|----------------|------------------|--------------------------------------------|-----------------------------------------|----------------|
| <b>Warfarin</b>   | 5.0            | PBS <sup>b</sup> | >60                                        | 104.1%                                  | stable control |
| <b>CMB-021805</b> | 5.0            | PBS <sup>b</sup> | >60                                        | 110.4%                                  |                |
| <b>CMB-087618</b> | 5.0            | PBS <sup>b</sup> | >60                                        | 66.9%                                   |                |
| <b>CMB-087647</b> | 5.0            | PBS <sup>b</sup> | >60                                        | 79.5%                                   |                |
| <b>CMB-087648</b> | 1.0            | PBS <sup>b</sup> | >60                                        | 86.7%                                   |                |
| <b>CMB-087649</b> | 5.0            | PBS <sup>b</sup> | >60                                        | 95.9%                                   |                |

<sup>a</sup>Half-life<sup>b</sup>PBS is Ca<sup>2+</sup>, Mg<sup>2+</sup>-free phosphate-buffered saline, pH 7.2.

### 4.3 In vitro ADME-Tox Individual Data

#### 4.3.1 PBS express solubility individual data

Shaded area represents OD below background.

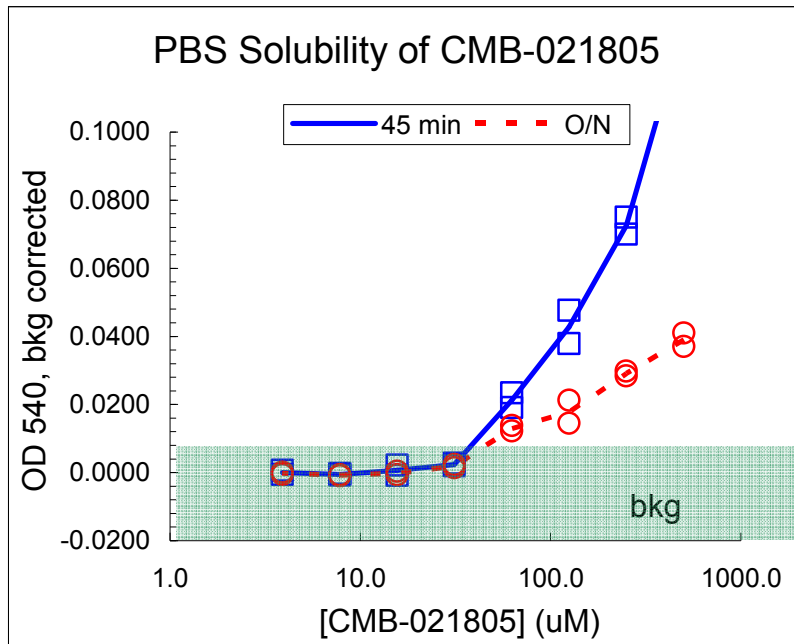

Test Agent: CMB-021805

Medium: PBS

OD 540 nm, bkg subtracted

| conc (uM) | 45 min  |         |        | O/N     |         |         |
|-----------|---------|---------|--------|---------|---------|---------|
|           | rpt 1   | rpt2    | mean   | rpt 1   | rpt2    | mean    |
| 500.0     | 0.1369  | 0.1258  | 0.131  | 0.0371  | 0.0410  | 0.0390  |
| 250.0     | 0.0700  | 0.0750  | 0.073  | 0.0284  | 0.0298  | 0.0291  |
| 125.0     | 0.0476  | 0.0379  | 0.043  | 0.0213  | 0.0145  | 0.0179  |
| 62.5      | 0.0234  | 0.0191  | 0.021  | 0.0138  | 0.0122  | 0.0130  |
| 31        | 0.0028  | 0.0020  | 0.002  | 0.0024  | 0.0014  | 0.0019  |
| 16        | -0.0008 | 0.0022  | 0.001  | 0.0004  | -0.0007 | -0.0001 |
| 8         | -0.0008 | -0.0003 | -0.001 | -0.0006 | -0.0009 | -0.0008 |
| 4         | -0.0006 | 0.0006  | 0.000  | -0.0005 | 0.0001  | -0.0002 |
| vehicle   | avg     | 0.0001  |        | avg     | 0.0007  |         |
|           | SD      | 0.0003  |        | SD      | 0.0011  |         |
|           | cutoff  | 0.0010  |        | cutoff  | 0.0039  |         |



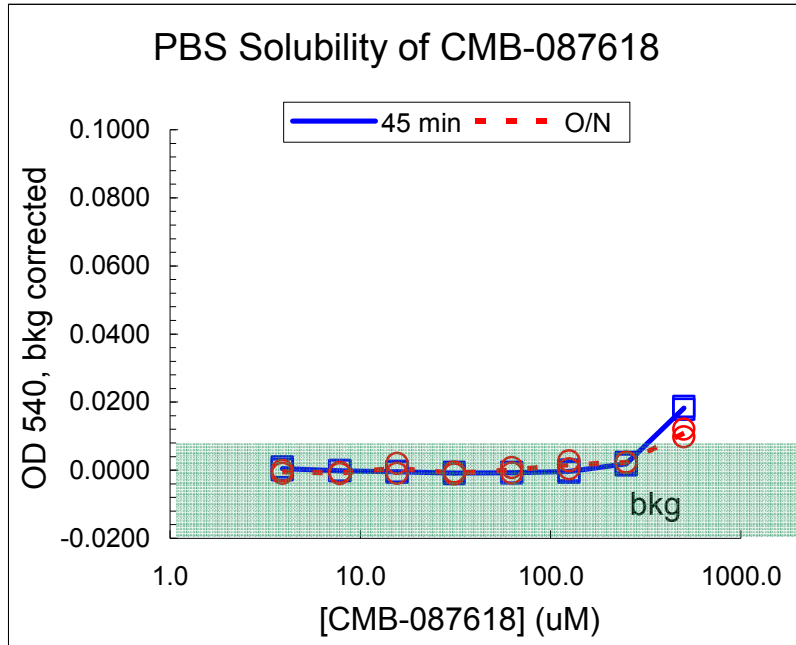

Test Agent: CMB-087618

Medium: PBS

OD 540 nm, bkg subtracted

| conc (uM) | 45 min        |               |              | O/N          |              |               |
|-----------|---------------|---------------|--------------|--------------|--------------|---------------|
|           | rpt 1         | rpt2          | mean         | rpt 1        | rpt2         | mean          |
| 500.0     | <b>0.0178</b> | <b>0.0188</b> | <b>0.018</b> | <b>0.010</b> | <b>0.012</b> | <b>0.0109</b> |
| 250.0     | 0.0022        | 0.0015        | <b>0.002</b> | 0.002        | 0.002        | <b>0.0023</b> |
| 125.0     | 0.0000        | -0.0007       | 0.000        | 0.003        | 0.000        | <b>0.0016</b> |
| 62.5      | -0.0006       | -0.0009       | -0.001       | 0.001        | -0.001       | 0.0000        |
| 31        | -0.0006       | -0.0010       | -0.001       | -0.001       | -0.001       | -0.0009       |
| 16        | -0.0006       | -0.0004       | 0.000        | -0.001       | 0.002        | 0.0005        |
| 8         | -0.0002       | -0.0001       | 0.000        | -0.001       | -0.001       | -0.0009       |
| 4         | 0.0009        | 0.0001        | 0.001        | 0.000        | -0.001       | -0.0005       |
| vehicle   | avg           | 0.0001        |              | avg          | 0.0007       |               |
|           | SD            | 0.0003        |              | SD           | 0.0011       |               |
|           | cutoff        | 0.0010        |              | cutoff       | 0.0039       |               |

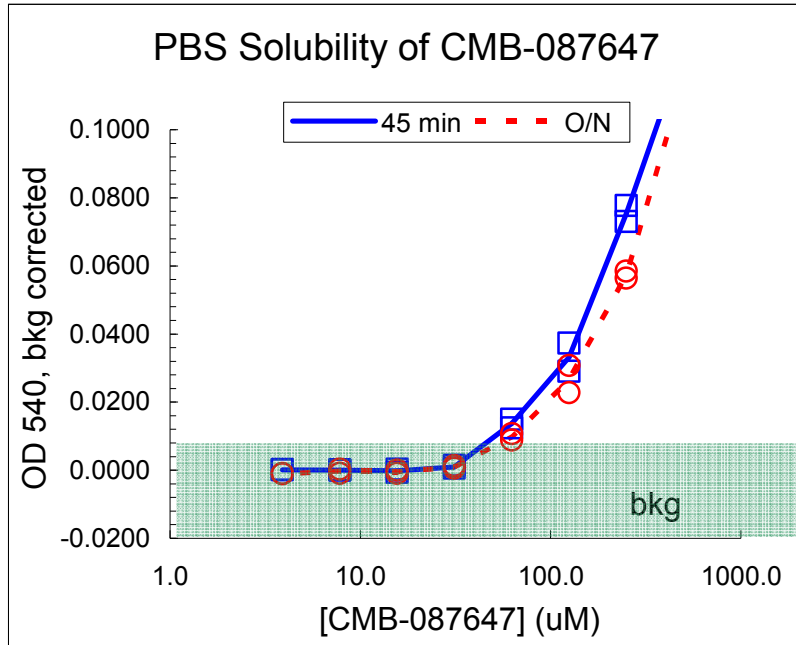

Test Agent: CMB-087647

Medium: PBS

OD 540 nm, bkg subtracted

| conc (uM) | 45 min        |               |              | O/N          |              |               |
|-----------|---------------|---------------|--------------|--------------|--------------|---------------|
|           | rpt 1         | rpt2          | mean         | rpt 1        | rpt2         | mean          |
| 500.0     | <b>0.1233</b> | <b>0.1244</b> | <b>0.124</b> | <b>0.117</b> | <b>0.113</b> | <b>0.1153</b> |
| 250.0     | <b>0.0777</b> | <b>0.0730</b> | <b>0.075</b> | <b>0.058</b> | <b>0.056</b> | <b>0.0574</b> |
| 125.0     | <b>0.0291</b> | <b>0.0373</b> | <b>0.033</b> | <b>0.023</b> | <b>0.031</b> | <b>0.0267</b> |
| 62.5      | <b>0.0150</b> | <b>0.0124</b> | <b>0.014</b> | <b>0.011</b> | <b>0.009</b> | <b>0.0098</b> |
| 31        | 0.0014        | 0.0006        | 0.001        | 0.001        | 0.001        | 0.0010        |
| 16        | 0.0003        | -0.0007       | 0.000        | 0.000        | -0.001       | -0.0004       |
| 8         | 0.0001        | 0.0000        | 0.000        | 0.000        | -0.001       | -0.0003       |
| 4         | 0.0002        | 0.0001        | 0.000        | -0.001       | -0.001       | -0.0010       |
| vehicle   | avg           | 0.0001        |              | avg          | 0.0007       |               |
|           | SD            | 0.0003        |              | SD           | 0.0011       |               |
|           | cutoff        | 0.0010        |              | cutoff       | 0.0039       |               |

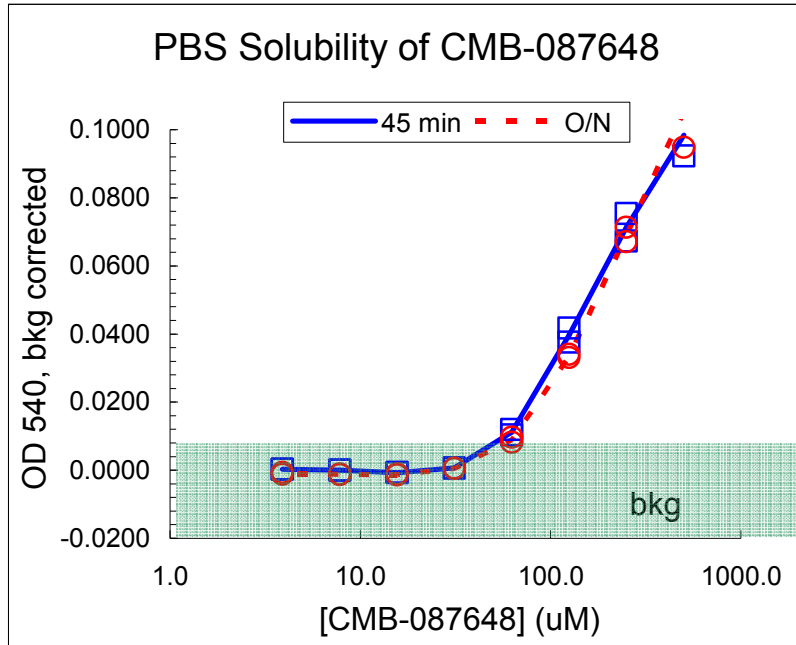

Test Agent: CMB-087648

Medium: PBS

OD 540 nm, bkg subtracted

| conc (uM) | 45 min        |               |              | O/N          |              |               |
|-----------|---------------|---------------|--------------|--------------|--------------|---------------|
|           | rpt 1         | rpt2          | mean         | rpt 1        | rpt2         | mean          |
| 500.0     | <b>0.1046</b> | <b>0.0923</b> | <b>0.098</b> | <b>0.116</b> | <b>0.095</b> | <b>0.1057</b> |
| 250.0     | <b>0.0754</b> | <b>0.0673</b> | <b>0.071</b> | <b>0.071</b> | <b>0.067</b> | <b>0.0692</b> |
| 125.0     | <b>0.0376</b> | <b>0.0418</b> | <b>0.040</b> | <b>0.033</b> | <b>0.034</b> | <b>0.0336</b> |
| 62.5      | <b>0.0120</b> | <b>0.0104</b> | <b>0.011</b> | <b>0.010</b> | <b>0.008</b> | <b>0.0090</b> |
| 31        | 0.0007        | 0.0006        | 0.001        | 0.001        | 0.000        | 0.0005        |
| 16        | -0.0006       | -0.0008       | -0.001       | -0.001       | -0.001       | -0.0013       |
| 8         | 0.0000        | 0.0000        | 0.000        | -0.001       | -0.001       | -0.0012       |
| 4         | 0.0003        | 0.0003        | 0.000        | -0.001       | -0.001       | -0.0009       |
| vehicle   | avg           | 0.0001        |              | avg          | 0.0007       |               |
|           | SD            | 0.0003        |              | SD           | 0.0011       |               |
|           | cutoff        | 0.0010        |              | cutoff       | 0.0039       |               |

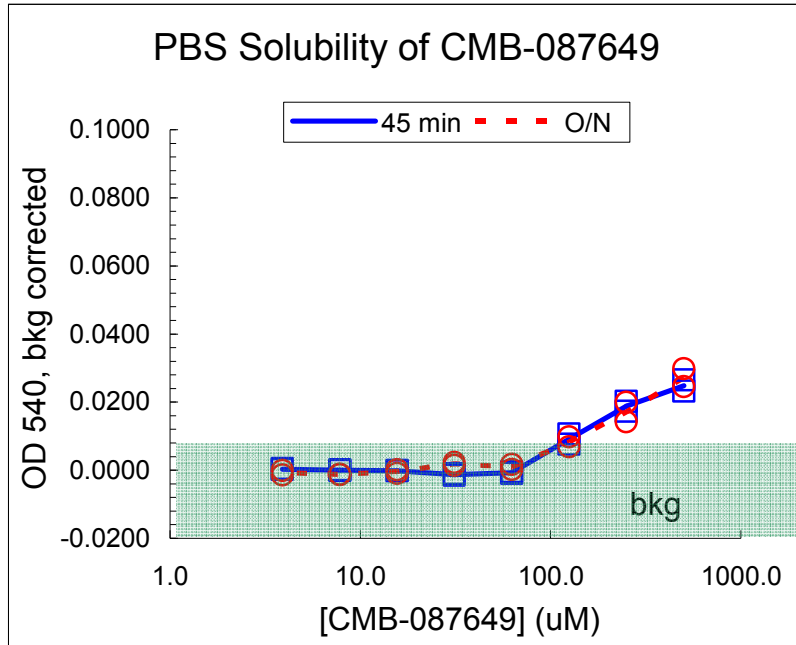

Test Agent: CMB-087649

Medium PBS

OD 540 nm, bkg subtracted

| conc (uM) | 45 min        |               |              | O/N          |              |               |
|-----------|---------------|---------------|--------------|--------------|--------------|---------------|
|           | rpt 1         | rpt2          | mean         | rpt 1        | rpt2         | mean          |
| 500.0     | <b>0.0265</b> | <b>0.0232</b> | <b>0.025</b> | <b>0.025</b> | <b>0.030</b> | <b>0.0271</b> |
| 250.0     | <b>0.0173</b> | <b>0.0203</b> | <b>0.019</b> | <b>0.014</b> | <b>0.020</b> | <b>0.0171</b> |
| 125.0     | <b>0.0076</b> | <b>0.0107</b> | <b>0.009</b> | <b>0.007</b> | <b>0.010</b> | <b>0.0083</b> |
| 62.5      | -0.0009       | -0.0005       | -0.001       | 0.000        | 0.002        | 0.0010        |
| 31        | -0.0010       | -0.0015       | -0.001       | 0.001        | 0.002        | <b>0.0019</b> |
| 16        | -0.0001       | -0.0002       | 0.000        | -0.001       | 0.000        | -0.0004       |
| 8         | 0.0001        | 0.0000        | 0.000        | -0.001       | -0.001       | -0.0012       |
| 4         | 0.0002        | 0.0005        | 0.000        | -0.001       | 0.000        | -0.0008       |
| vehicle   | avg           | 0.0001        |              | avg          | 0.0007       |               |
|           | SD            | 0.0003        |              | SD           | 0.0011       |               |
|           | cutoff        | 0.0010        |              | cutoff       | 0.0039       |               |

### 4.3.2 Microsomal intrinsic clearance individual data

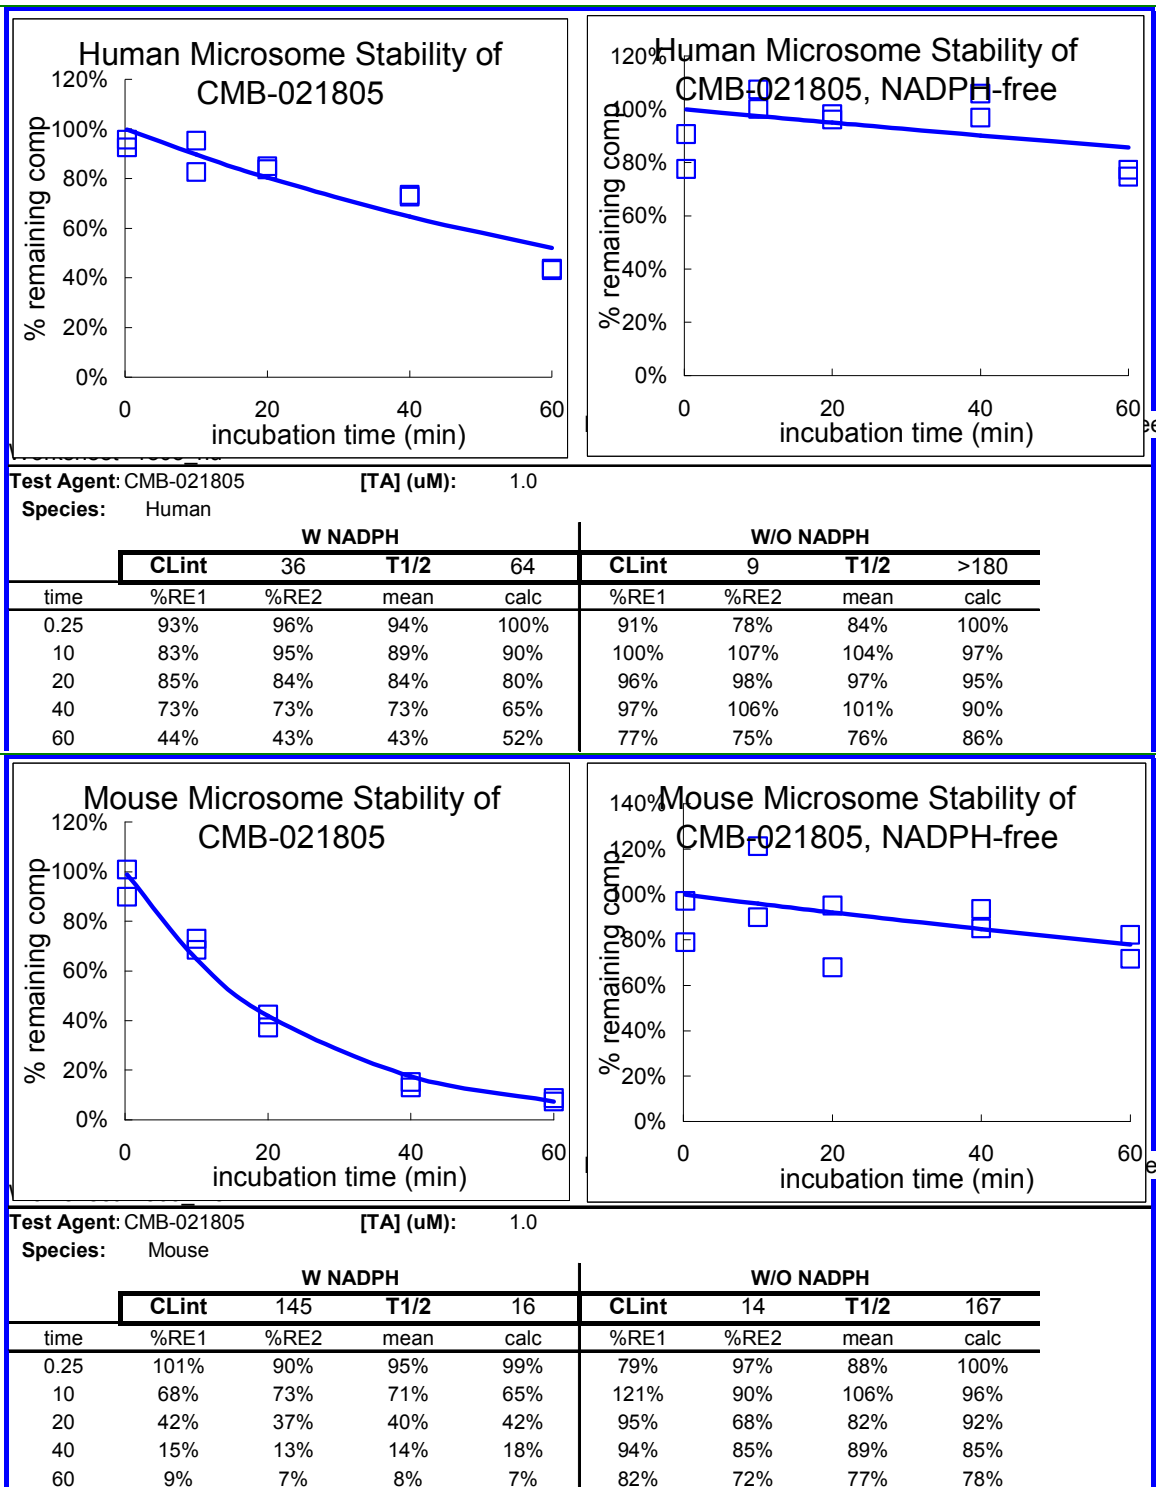

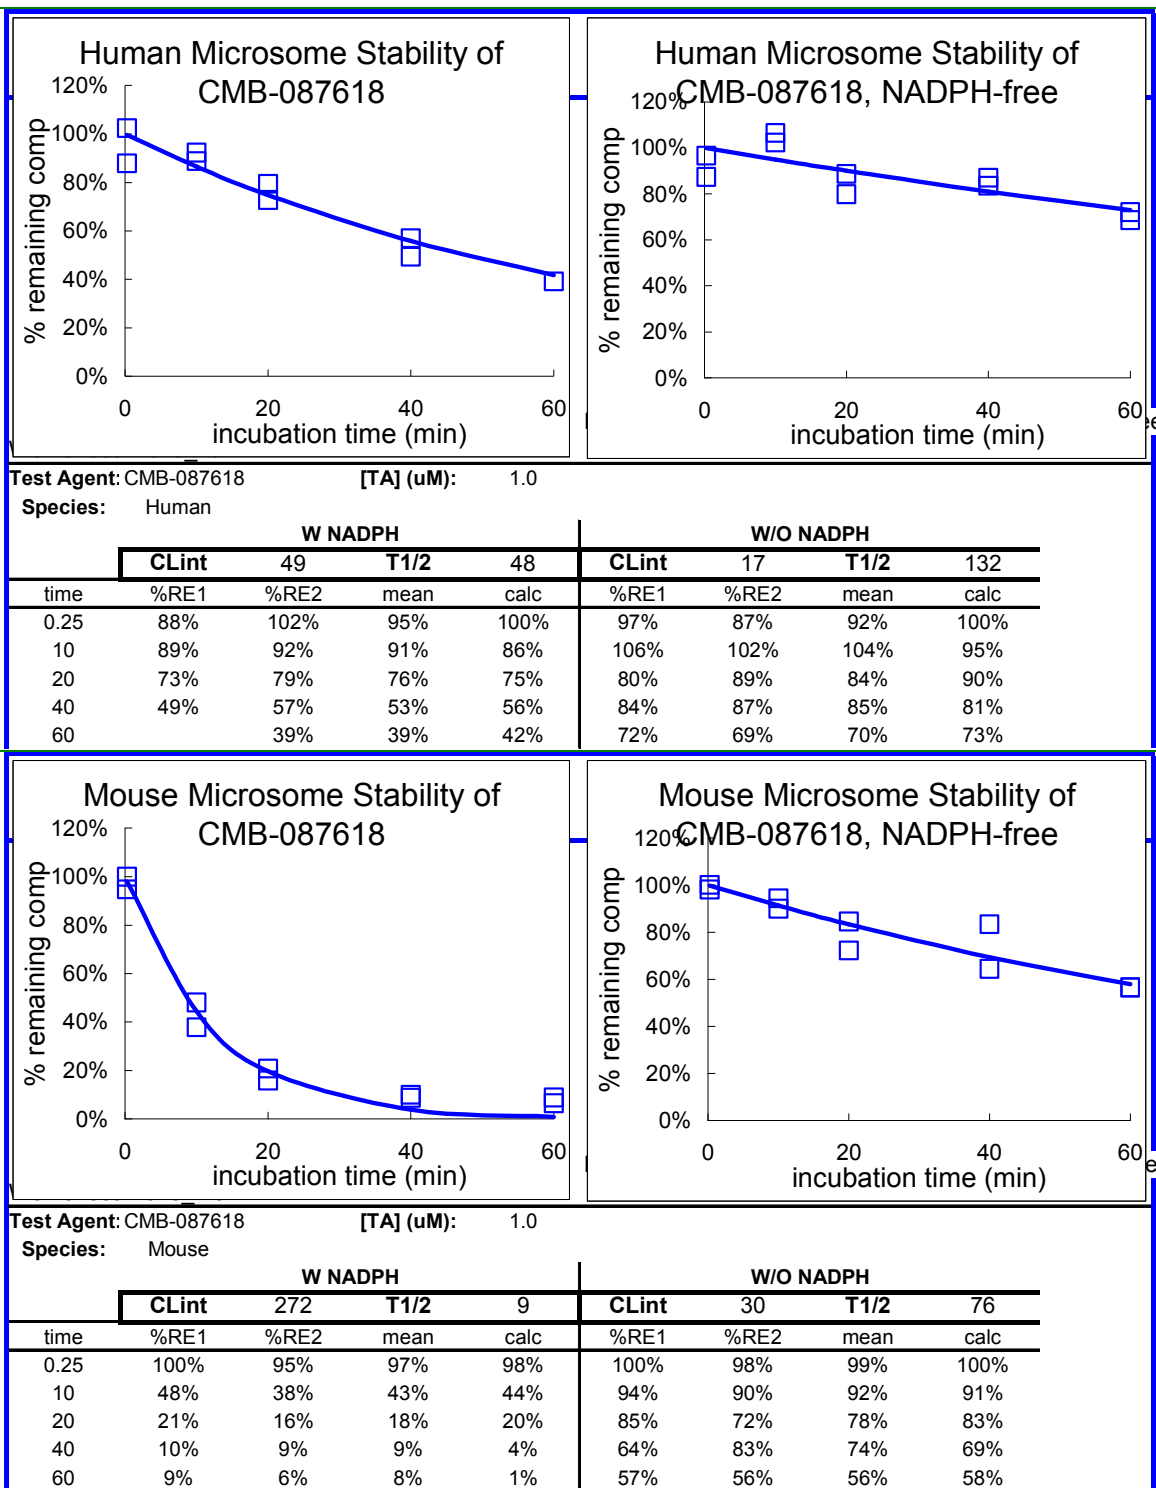

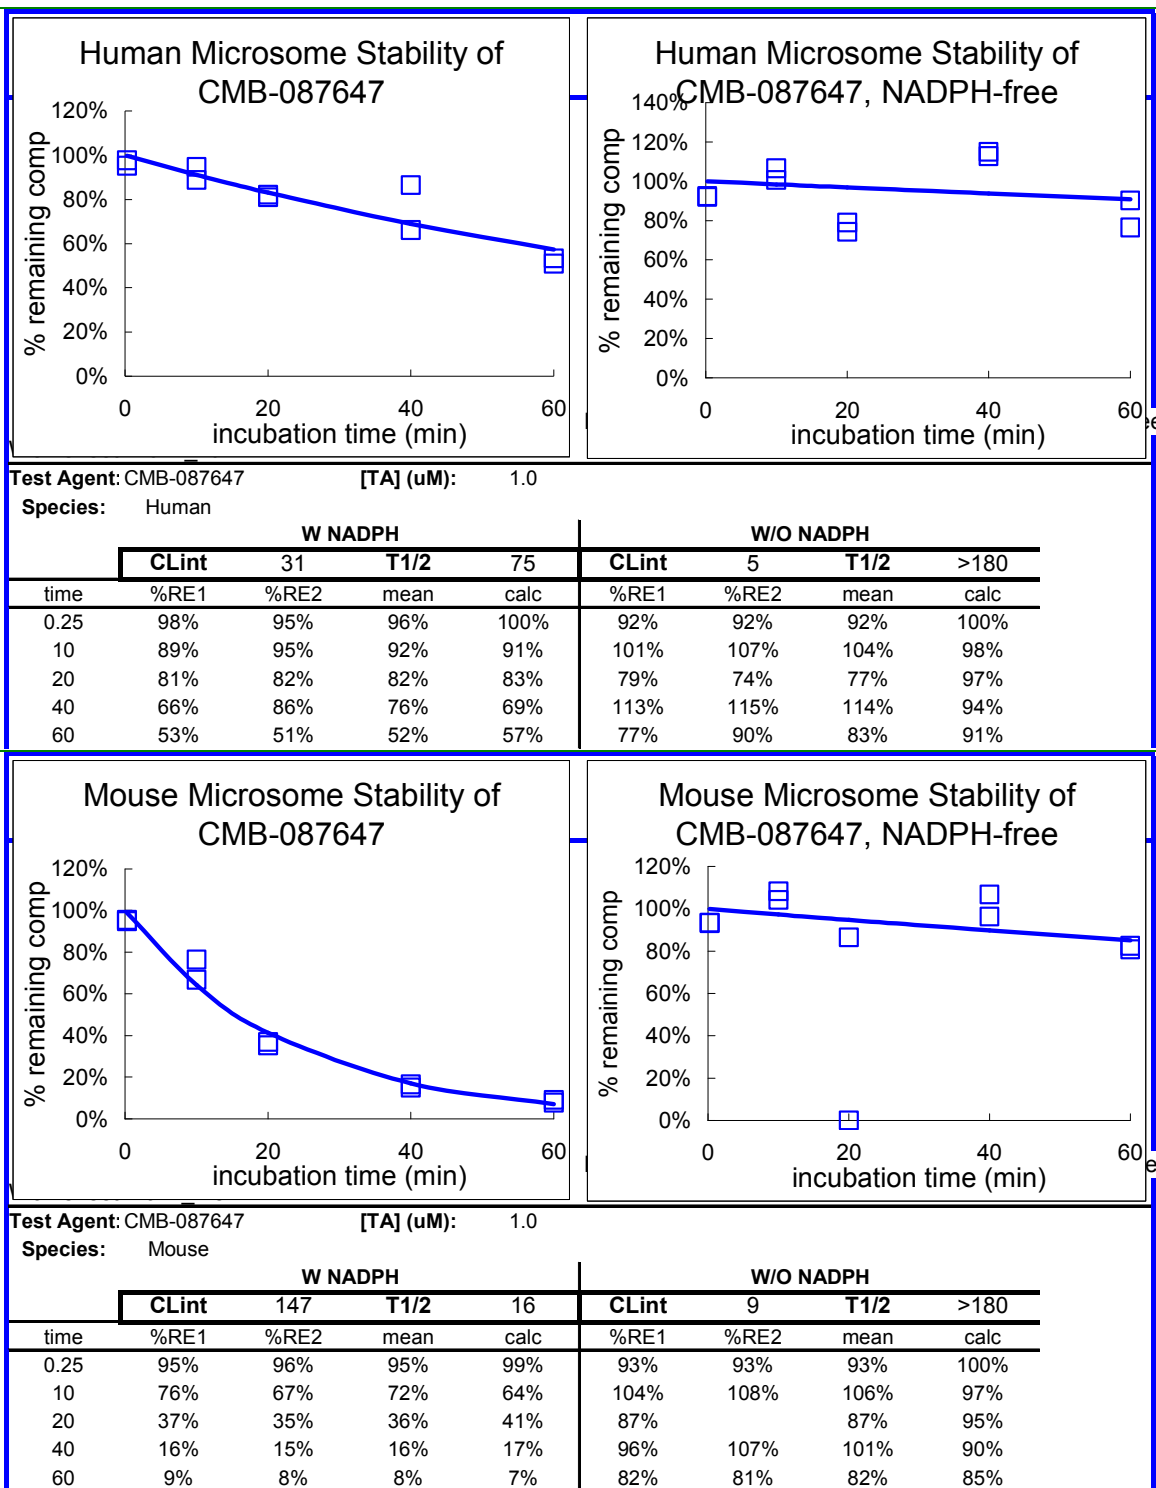

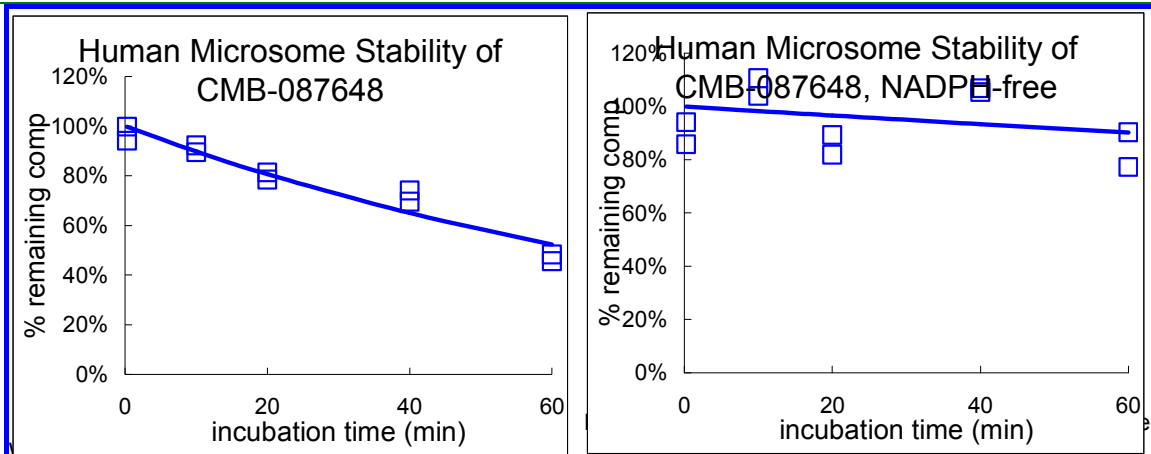

Test Agent: CMB-087648 [TA] (uM): 1.0  
Species: Human

| time | W NADPH |      |      |      | W/O NADPH |      |      |      |
|------|---------|------|------|------|-----------|------|------|------|
|      | CLint   | 36   | T1/2 | 64   | CLint     | 6    | T1/2 | >180 |
|      | %RE1    | %RE2 | mean | calc | %RE1      | %RE2 | mean | calc |
| 0.25 | 100%    | 94%  | 97%  | 100% | 94%       | 86%  | 90%  | 100% |
| 10   | 89%     | 92%  | 91%  | 90%  | 111%      | 104% | 107% | 98%  |
| 20   | 81%     | 78%  | 80%  | 81%  | 89%       | 82%  | 86%  | 97%  |
| 40   | 70%     | 74%  | 72%  | 65%  | 105%      | 107% | 106% | 93%  |
| 60   | 48%     | 46%  | 47%  | 52%  | 77%       | 90%  | 84%  | 90%  |

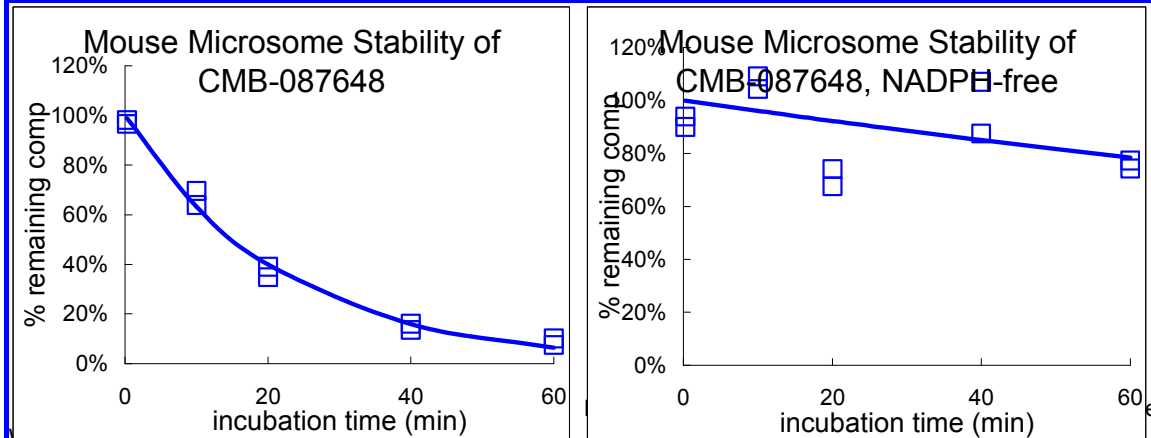

Test Agent: CMB-087648 [TA] (uM): 1.0  
Species: Mouse

| time | W NADPH |      |      |      | W/O NADPH |      |      |      |
|------|---------|------|------|------|-----------|------|------|------|
|      | CLint   | 153  | T1/2 | 15   | CLint     | 14   | T1/2 | 171  |
|      | %RE1    | %RE2 | mean | calc | %RE1      | %RE2 | mean | calc |
| 0.25 | 98%     | 97%  | 97%  | 99%  | 90%       | 94%  | 92%  | 100% |
| 10   | 64%     | 70%  | 67%  | 63%  | 109%      | 104% | 107% | 96%  |
| 20   | 39%     | 35%  | 37%  | 40%  | 74%       | 68%  | 71%  | 92%  |
| 40   | 16%     | 14%  | 15%  | 16%  | 88%       | 107% | 97%  | 85%  |
| 60   | 10%     | 7%   | 9%   | 6%   | 74%       | 77%  | 76%  | 78%  |



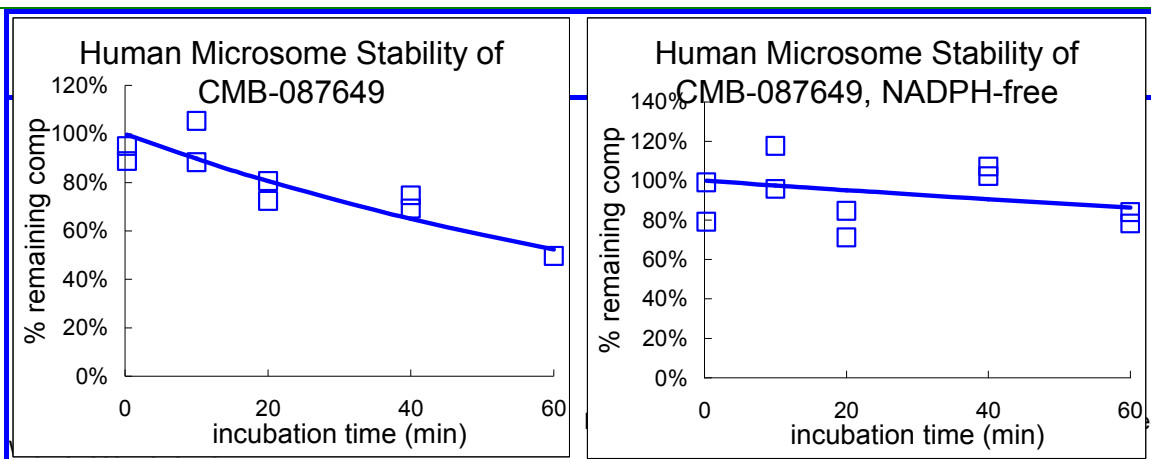

Test Agent: CMB-087649 [TA] (uM): 1.0  
 Species: Human

| time | W NADPH |      |      |      | W/O NADPH |      |      |      |
|------|---------|------|------|------|-----------|------|------|------|
|      | CLint   | %RE1 | %RE2 | T1/2 | CLint     | %RE1 | %RE2 | T1/2 |
| 0.25 | 36      | 89%  | 95%  | 64   | 8         | 99%  | 79%  | >180 |
| 10   |         | 88%  | 105% |      |           | 96%  | 118% |      |
| 20   |         | 81%  | 72%  |      |           | 85%  | 71%  |      |
| 40   |         | 69%  | 75%  |      |           | 102% | 107% |      |
| 60   |         |      | 50%  |      |           | 84%  | 78%  |      |

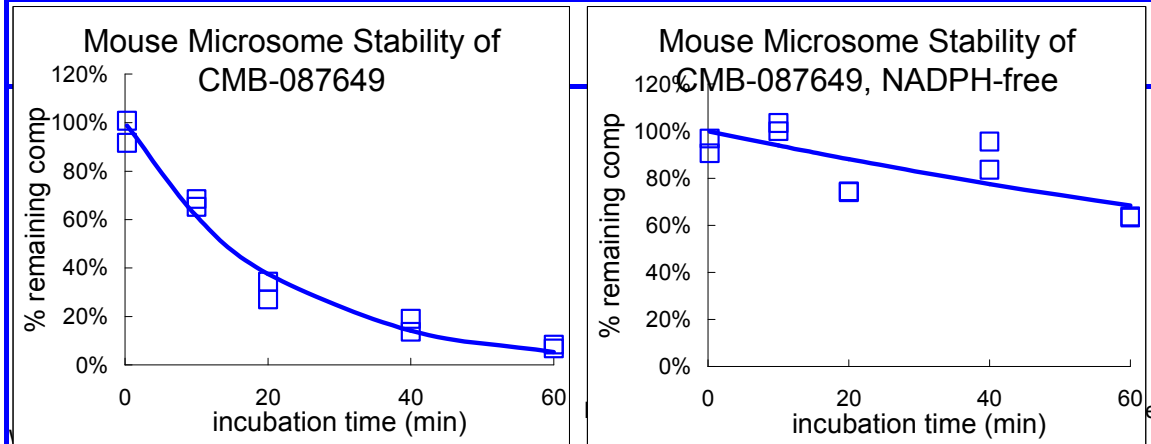

Test Agent: CMB-087649 [TA] (uM): 1.0  
 Species: Mouse

| time | W NADPH |      |      |      | W/O NADPH |      |      |      |
|------|---------|------|------|------|-----------|------|------|------|
|      | CLint   | %RE1 | %RE2 | T1/2 | CLint     | %RE1 | %RE2 | T1/2 |
| 0.25 | 163     | 92%  | 101% | 14   | 21        | 97%  | 91%  | 109  |
| 10   |         | 68%  | 65%  |      |           | 103% | 100% |      |
| 20   |         | 34%  | 27%  |      |           | 74%  | 74%  |      |
| 40   |         | 19%  | 14%  |      |           | 84%  | 96%  |      |
| 60   |         | 8%   | 7%   |      |           | 64%  | 63%  |      |

**4.3.3 Plasma half-life individual data**

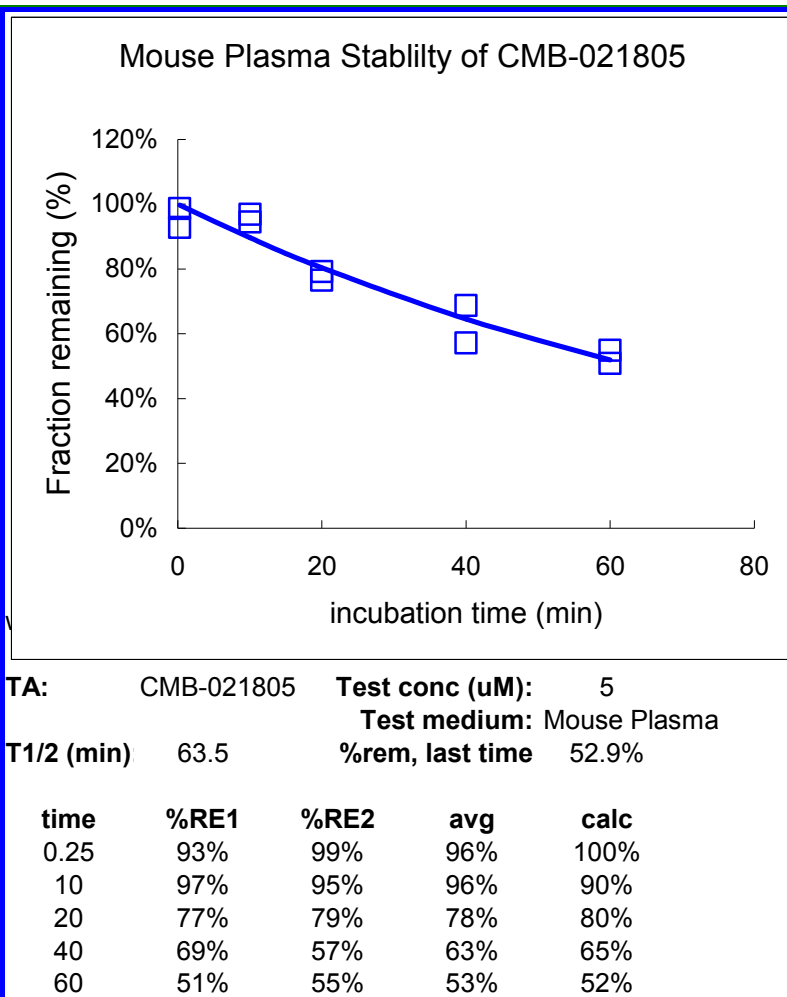

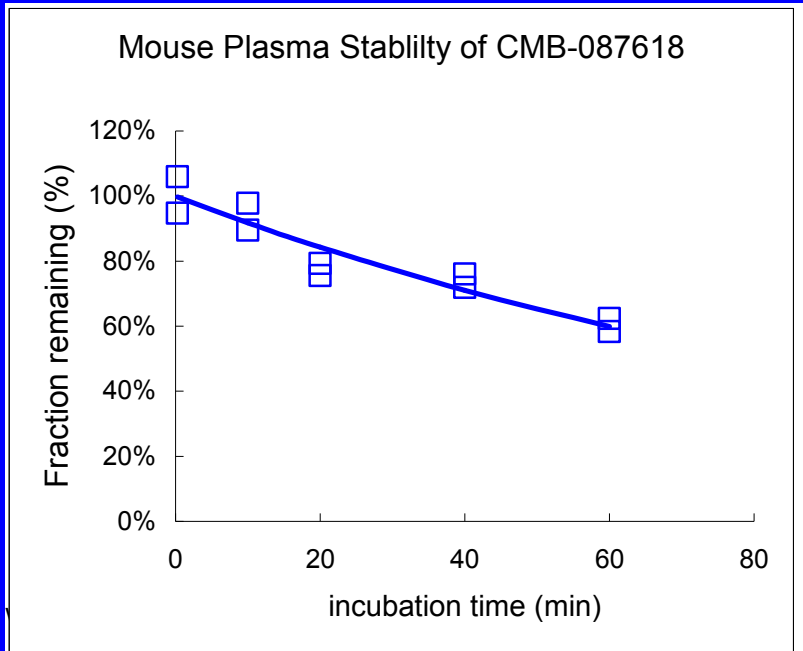

TA: CMB-087618 Test conc (uM): 5  
 Test medium: Mouse Plasma  
 T1/2 (min): 81.2 %rem, last time 60.4%

| time | %RE1 | %RE2 | avg  | calc |
|------|------|------|------|------|
| 0.25 | 95%  | 106% | 100% | 100% |
| 10   | 98%  | 90%  | 94%  | 92%  |
| 20   | 79%  | 76%  | 77%  | 84%  |
| 40   | 76%  | 72%  | 74%  | 71%  |
| 60   | 58%  | 62%  | 60%  | 60%  |

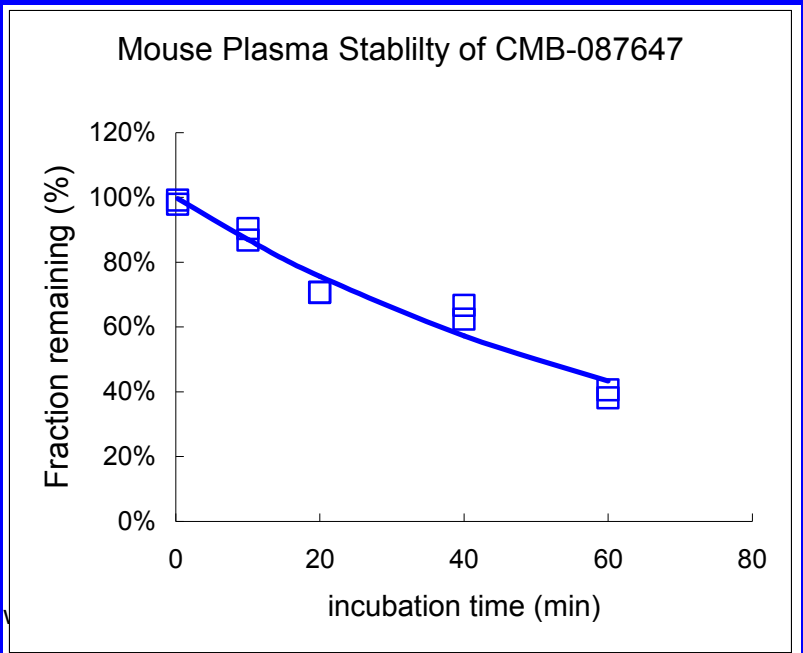

TA: CMB-087647 Test conc (uM): 5  
Test medium: Mouse Plasma  
T1/2 (min): 49.8 %rem, last time 39.4%

| time | %RE1 | %RE2 | avg | calc |
|------|------|------|-----|------|
| 0.25 | 98%  | 99%  | 99% | 100% |
| 10   | 90%  | 87%  | 89% | 87%  |
| 20   | 71%  | 71%  | 71% | 76%  |
| 40   | 62%  | 67%  | 65% | 57%  |
| 60   | 41%  | 38%  | 39% | 43%  |

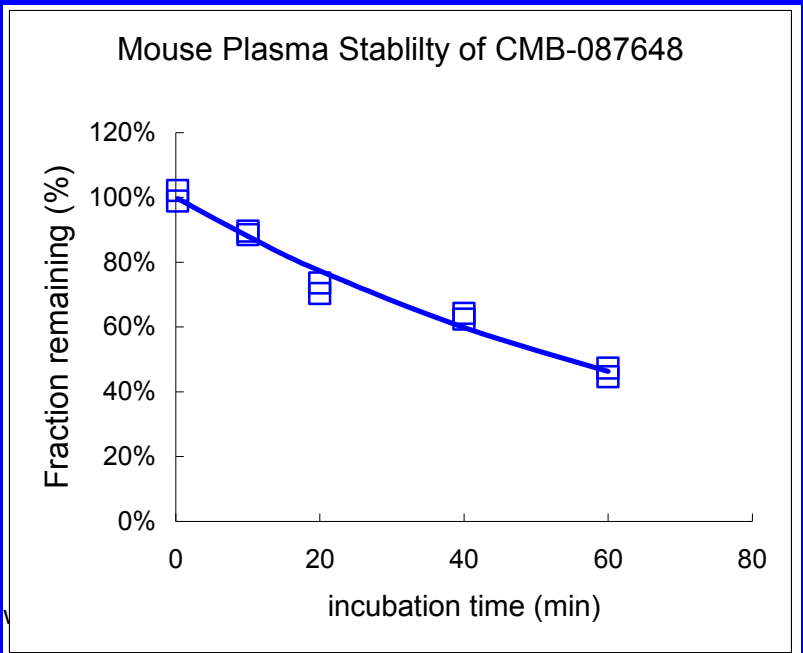

TA: CMB-087648 Test conc (uM): 1  
Test medium: Mouse Plasma  
T1/2 (min): 54.0 %rem, last time 46.0%

| time | %RE1 | %RE2 | avg  | calc |
|------|------|------|------|------|
| 0.25 | 102% | 99%  | 100% | 100% |
| 10   | 88%  | 90%  | 89%  | 88%  |
| 20   | 70%  | 74%  | 72%  | 77%  |
| 40   | 64%  | 62%  | 63%  | 60%  |
| 60   | 45%  | 47%  | 46%  | 46%  |

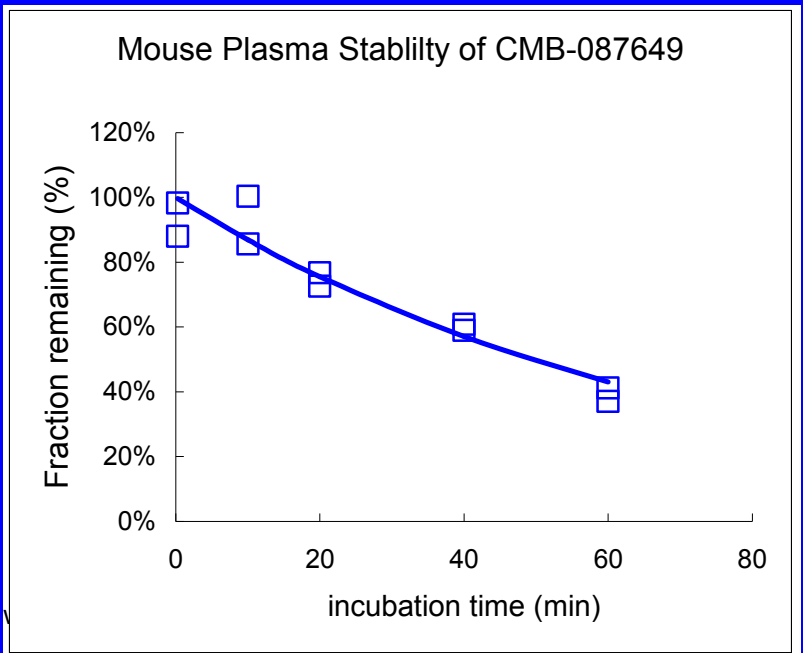

TA: CMB-087649 Test conc (uM): 5  
Test medium: Mouse Plasma  
T1/2 (min): 49.4 %rem, last time 39.1%

| time | %RE1 | %RE2 | avg | calc |
|------|------|------|-----|------|
| 0.25 | 88%  | 98%  | 93% | 100% |
| 10   | 100% | 86%  | 93% | 87%  |
| 20   | 73%  | 77%  | 75% | 76%  |
| 40   | 59%  | 61%  | 60% | 57%  |
| 60   | 37%  | 41%  | 39% | 43%  |

**4.3.4 Buffer half-life individual data**

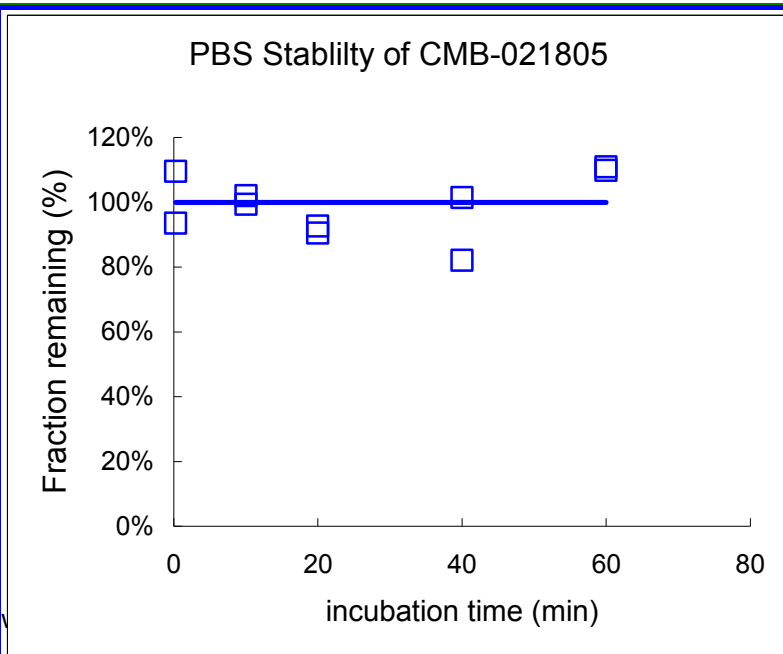

TA: CMB-021805 Test conc (uM): 5  
 Test medium: PBS  
 T1/2 (min): >60 %rem, last time 110.4%

| time | %RE1 | %RE2 | avg  | calc |
|------|------|------|------|------|
| 0.25 | 94%  | 110% | 102% | 100% |
| 10   | 99%  | 102% | 101% | 100% |
| 20   | 93%  | 91%  | 92%  | 100% |
| 40   | 101% | 82%  | 92%  | 100% |
| 60   | 111% | 110% | 110% | 100% |

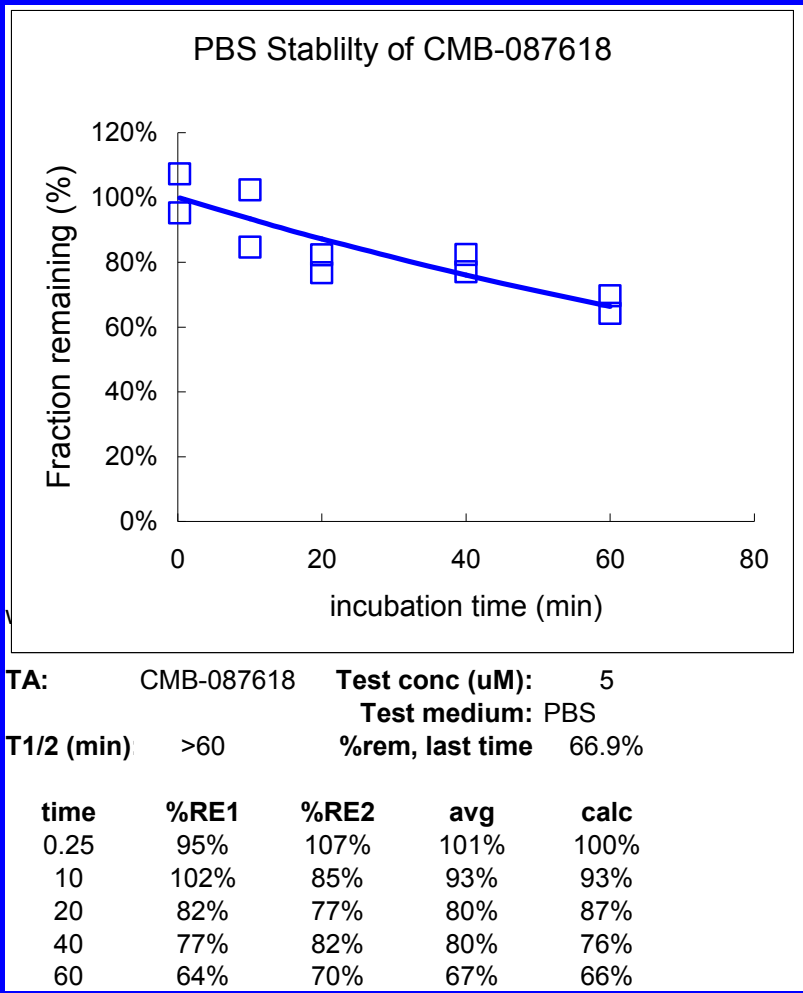



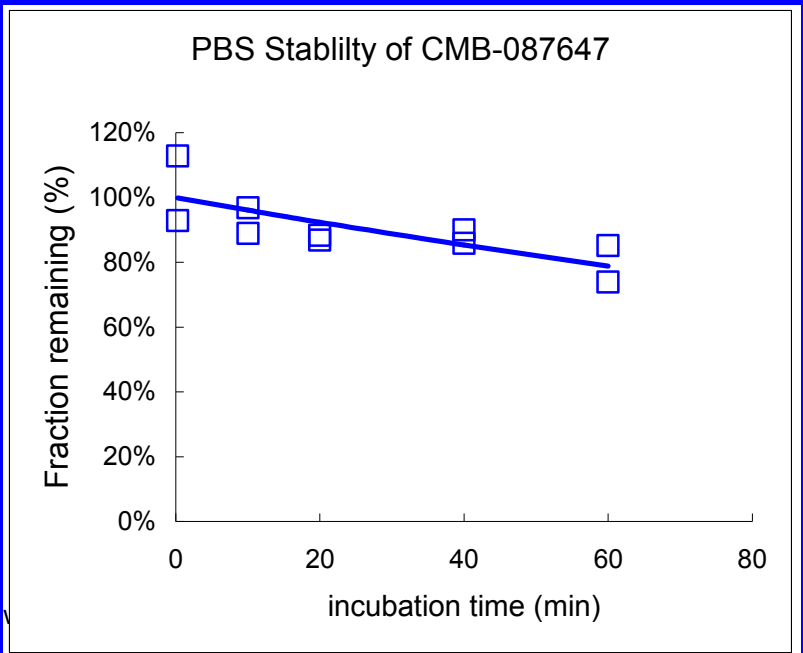

TA: CMB-087647 Test conc (uM): 5  
Test medium: PBS  
T1/2 (min): >60 %rem, last time 79.5%

| time | %RE1 | %RE2 | avg  | calc |
|------|------|------|------|------|
| 0.25 | 93%  | 113% | 103% | 100% |
| 10   | 97%  | 89%  | 93%  | 96%  |
| 20   | 88%  | 87%  | 88%  | 92%  |
| 40   | 90%  | 86%  | 88%  | 85%  |
| 60   | 85%  | 74%  | 80%  | 79%  |

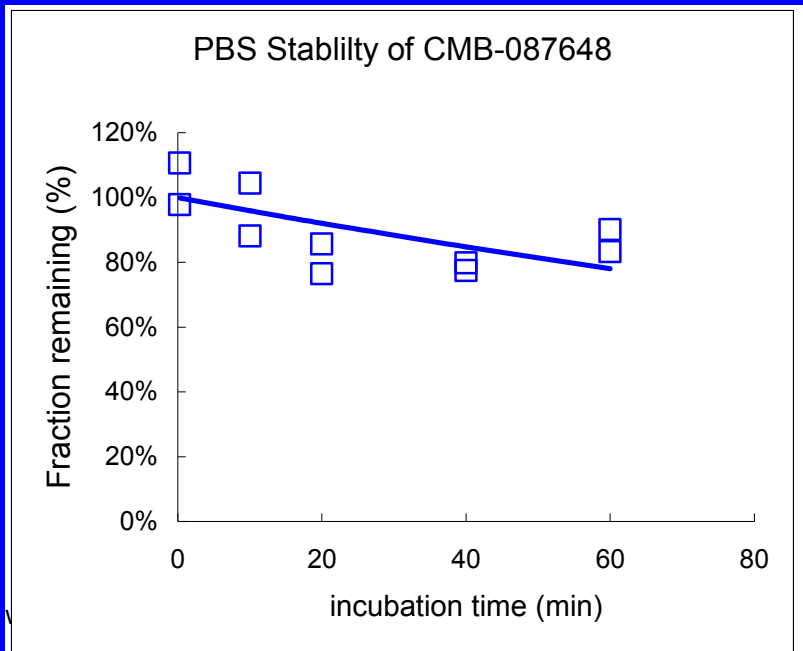

TA: CMB-087648 Test conc (uM): 1  
 Test medium: PBS  
 T1/2 (min): >60 %rem, last time 86.7%

| time | %RE1 | %RE2 | avg  | calc |
|------|------|------|------|------|
| 0.25 | 98%  | 111% | 104% | 100% |
| 10   | 104% | 88%  | 96%  | 96%  |
| 20   | 86%  | 76%  | 81%  | 92%  |
| 40   | 77%  | 80%  | 79%  | 85%  |
| 60   | 83%  | 90%  | 87%  | 78%  |

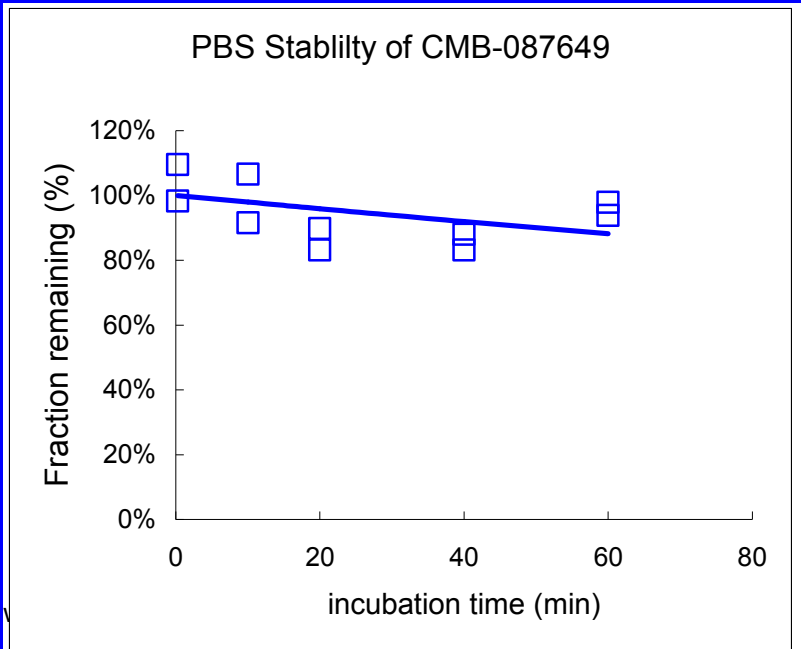

TA: CMB-087649 Test conc (uM): 5  
 Test medium: PBS  
 T1/2 (min): >60 %rem, last time 95.9%

| time | %RE1 | %RE2 | avg  | calc |
|------|------|------|------|------|
| 0.25 | 98%  | 110% | 104% | 100% |
| 10   | 107% | 92%  | 99%  | 98%  |
| 20   | 90%  | 83%  | 86%  | 96%  |
| 40   | 83%  | 88%  | 86%  | 92%  |
| 60   | 94%  | 98%  | 96%  | 88%  |

## 5 References

Stewart, BH, *et al.* (1995) "Comparison of intestinal permeabilities determined in multiple *in vitro* and *in situ* models: Relationship to absorption in humans." *Pharm. Res.* 12:693.

Houston, JB (1994) "Utility of *in vitro* drug metabolism data in predicting *in vivo* metabolic clearance." *Biochem. Pharmacol.* 47:1469.

Singh, R, *et al.* (1996) "*In vitro* metabolism of a potent HIV-protease inhibitor (141W94) using rat, monkey and human liver S9." *Rapid Commun Mass Spectrom* 10:1019.

## **6 Storage and Retention of Records**

All documents generated in this study (raw data, the study plan, a copy of this report, etc.) will be stored for three years from the date of this document. Only authorized Apredica employees will have access to the archives.

The original final report will be provided to the sponsor and will be kept by the sponsor under its sole responsibility.

## 7 Appendices

### 7.1 Appendix A. Standard Aprecica Methods

#### Buffer half-life

The test agent is incubated in duplicate with test medium at 37 °C. The reaction contains medium and 2% DMSO. At the indicated times, an aliquot is removed from each experimental reaction and mixed with three volumes of ice-cold Stop Solution (methanol containing propranolol, diclofenac, or other internal standard). Stopped reactions are incubated at least ten minutes at -20 °C. The samples are centrifuged to remove any precipitate, and the supernatants are analyzed by LC/MS/MS to quantitate the remaining parent. Data are converted to % remaining by dividing by the time zero concentration value. Data are fit to a first-order decay model to determine half-life.

#### Microsomal intrinsic clearance

The test agent is incubated in duplicate with microsomes at 37 °C. The reaction contains microsomal protein in 100 mM potassium phosphate, 2 mM NADPH, 3 mM MgCl<sub>2</sub>, pH 7.4. A control is run for each test agent omitting NADPH to detect NADPH-free degradation. The indicated times, an aliquot is removed from each experimental and control reaction and mixed with an equal volume of ice-cold Stop Solution (0.3% acetic acid in acetonitrile containing haloperidol, diclofenac, or other internal standard). Stopped reactions are incubated at least ten minutes at -20 °C, and an additional volume of water is added. The samples are centrifuged to remove precipitated protein, and the supernatants are analyzed by LC/MS/MS to quantitate the remaining parent. Data are converted to % remaining by dividing by the time zero concentration value. Data are fit to a first-order decay model to determine half-life. Intrinsic clearance is calculated from the half-life and the protein concentrations:  $CL_{int} = \ln(2) / (T_{1/2} [\text{microsomal protein}])$ .

#### Plasma half-life

The test agent is incubated in duplicate with plasma at 37 °C. The reaction contains plasma and 2% DMSO. At the indicated times, an aliquot is removed from each experimental reaction and mixed with three volumes of ice-cold Stop Solution (methanol containing propranolol, diclofenac, or other internal standard). Stopped reactions are incubated at least ten minutes at -20 °C. The samples are centrifuged to remove precipitated protein, and the supernatants are analyzed by LC/MS/MS to quantitate the remaining parent. Data are converted to % remaining by dividing by the time zero concentration value. Data are fit to a first-order decay model to determine half-life.

#### PBS express solubility

Serial dilutions of test agent are prepared in test agent at 100x the final concentration. Test agent solutions are diluted 100-fold into PBS in a 96-well plate and mixed. The absorbance of the PBS-containing plate is measured prior to adding the test agents to determine the background absorbance. After 45 min and 16 hr, the presence of precipitate is then detected by turbidity (absorbance at 540 nm). An absorbance value of greater than (mean + 3x standard deviation of the blank), after subtracting the pre-experiment background, is indicative of turbidity. For brightly colored compounds, a visual inspection of the plate is performed to verify the solubility limit determined by UV absorbance. The solubility limit is reported as the highest experimental concentration with no evidence of turbidity.

## 7.2 Appendix B. Sample Spectra and Chromatograms of the Test Agents

### CMB-087618 Product Ion Scan

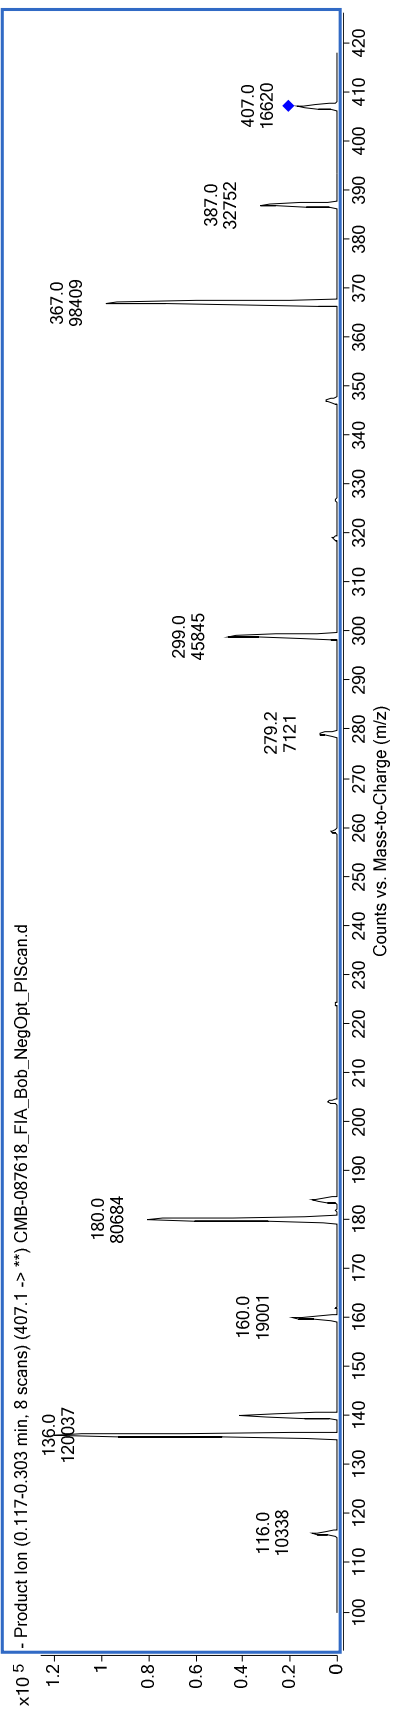

### CMB-087618 Sample chromatogram

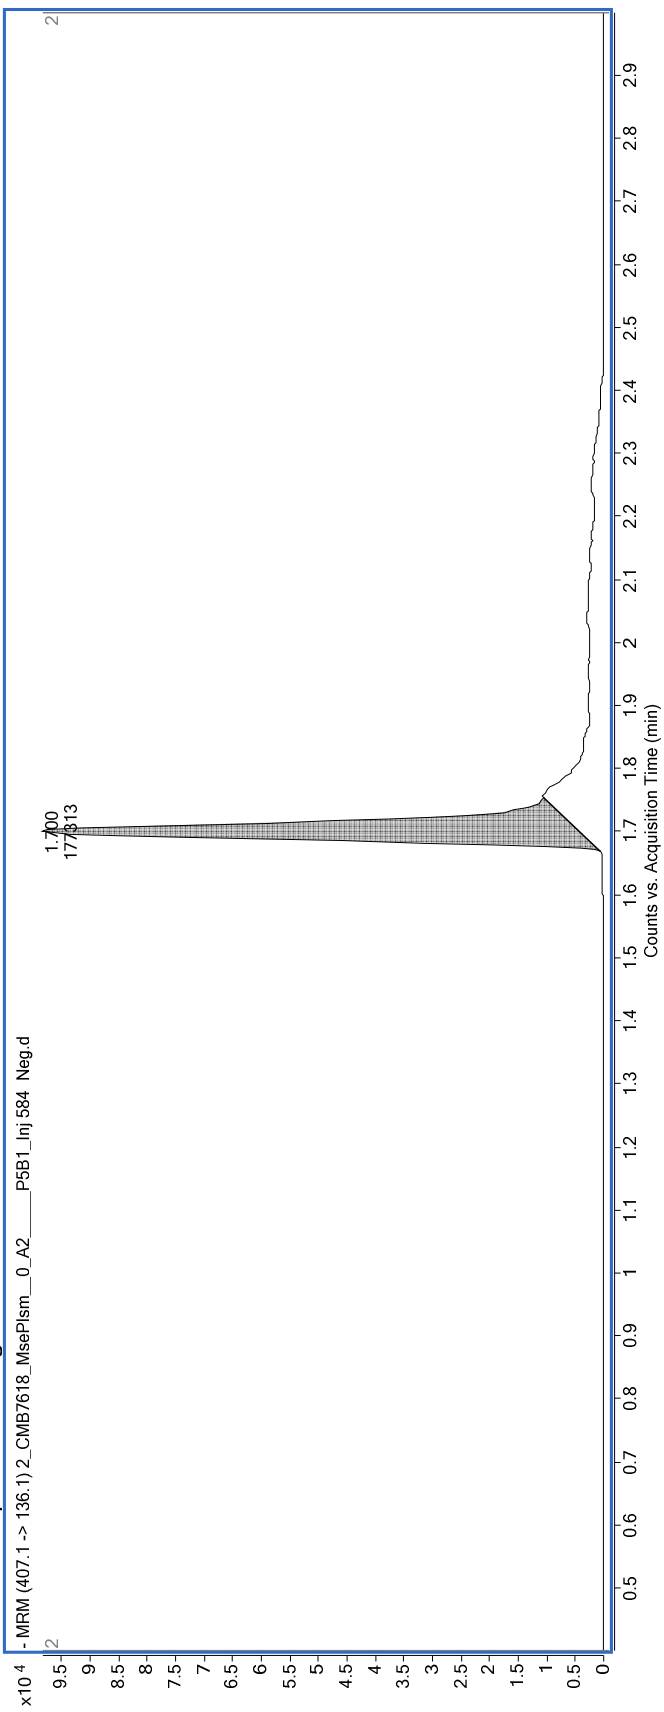

### CMB-087649 Product ion Scan

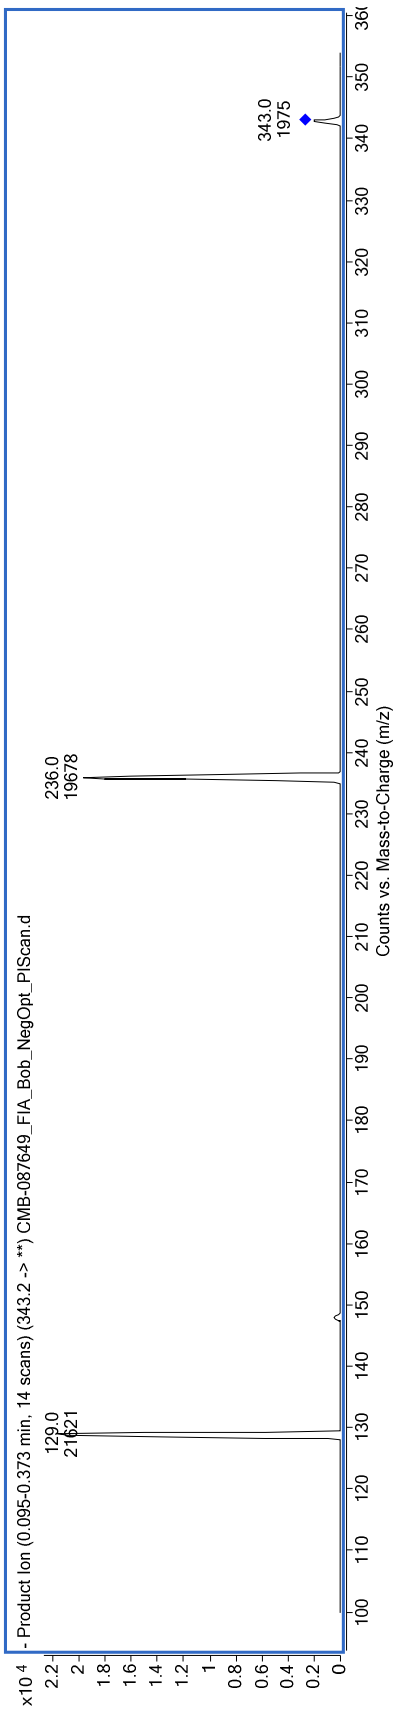



### CMB-087649 Sample chromatogram

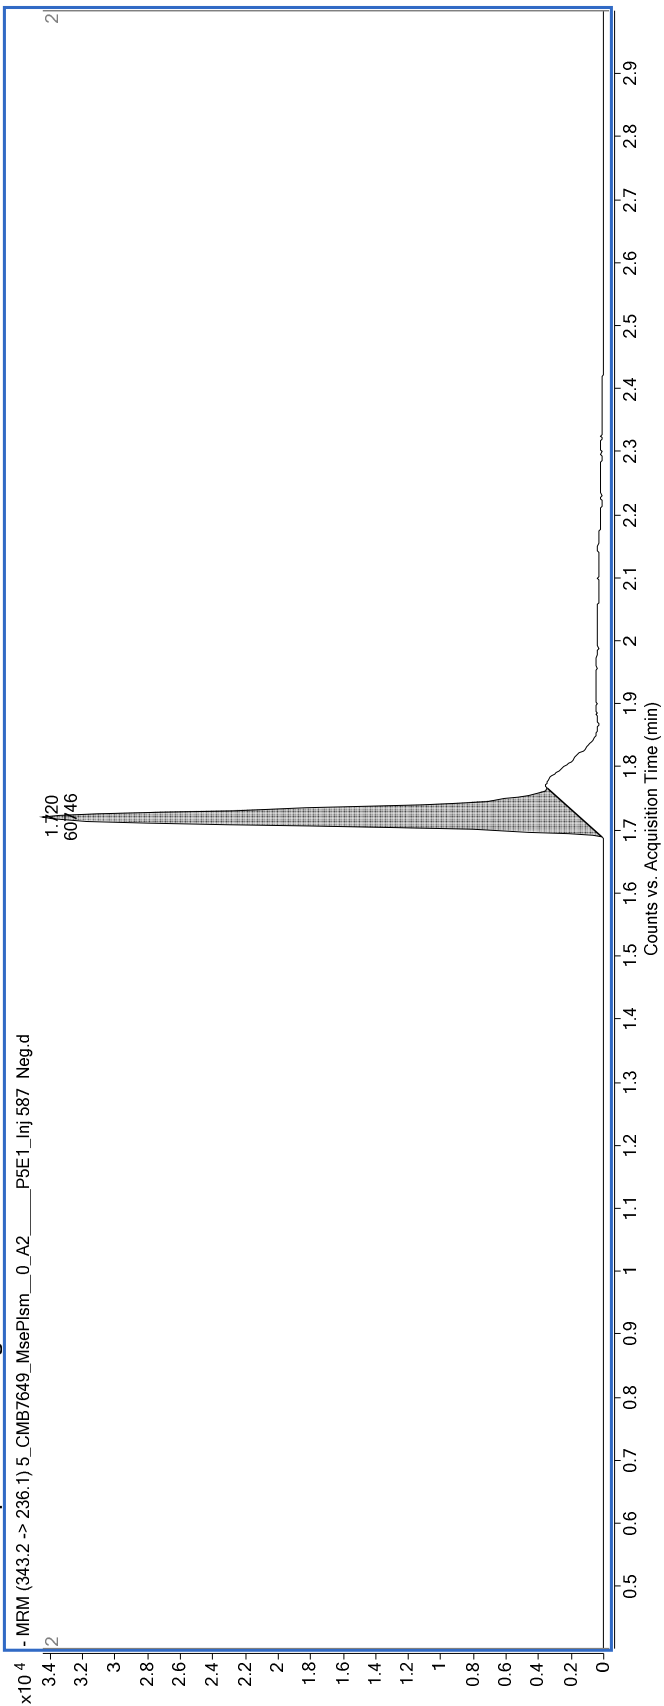

### CMB-087647 Product ion Scan

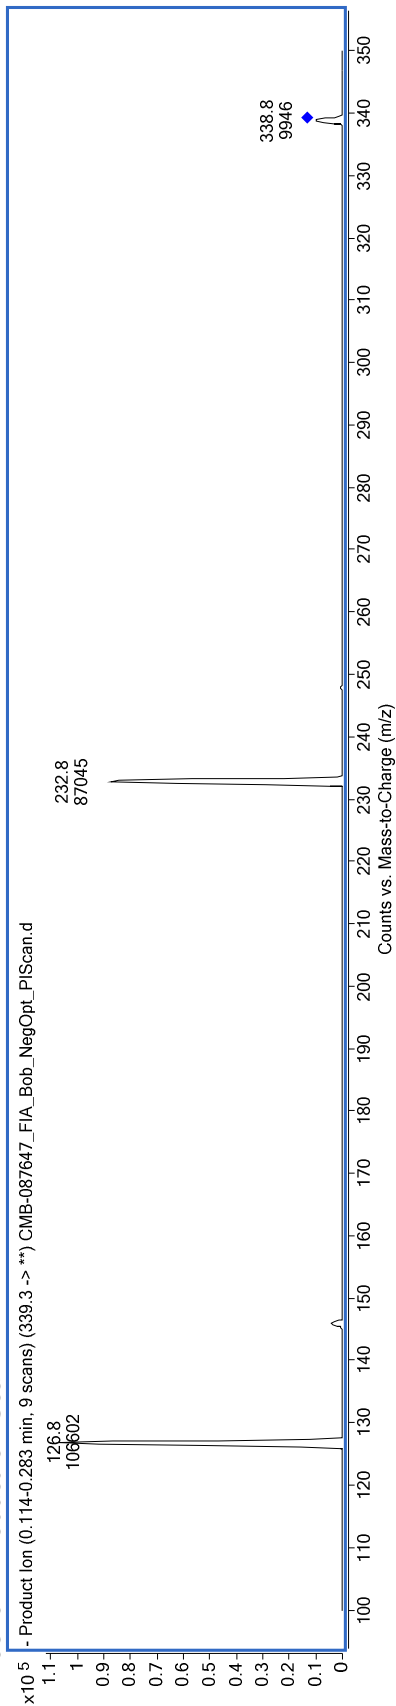

### CMB-087647 Sample chromatogram

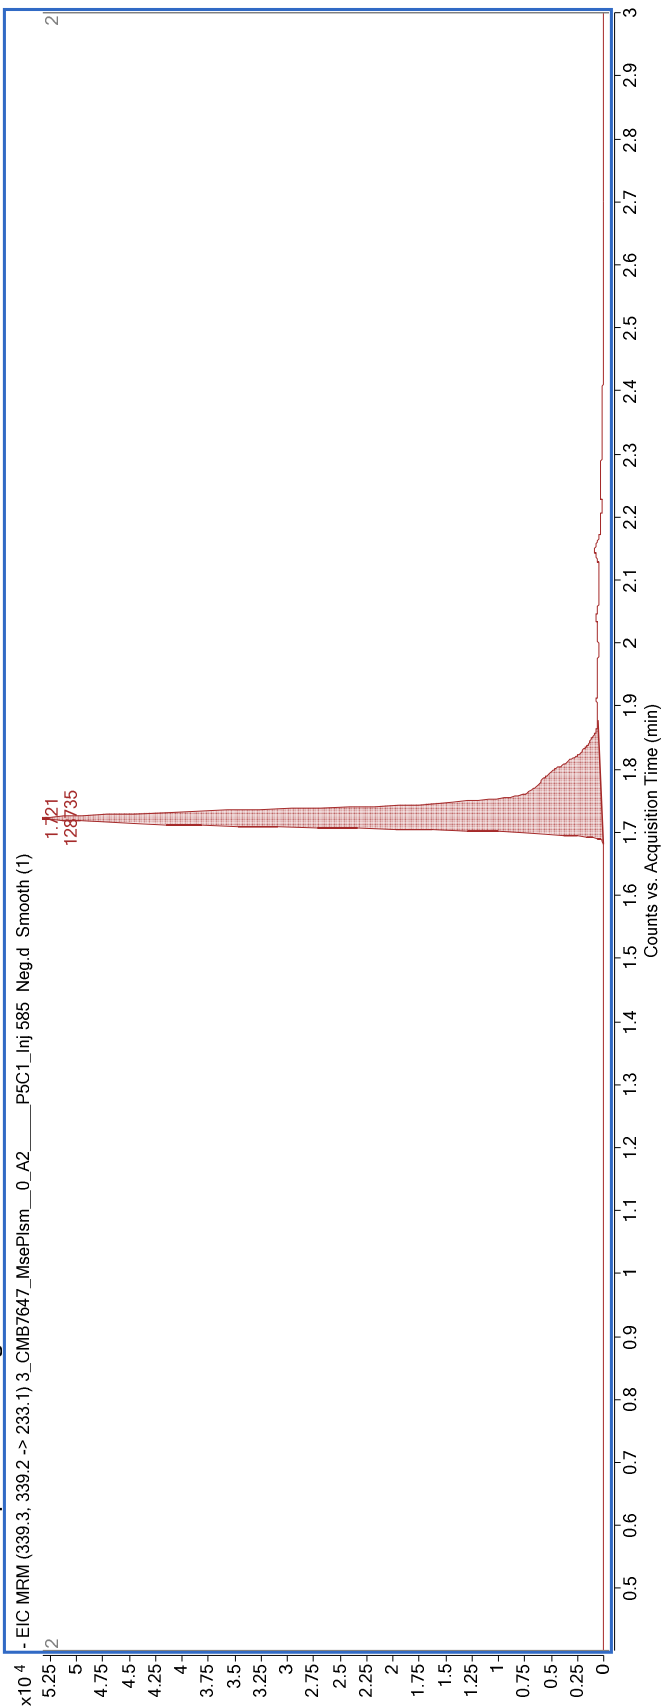

### CMB-087648 Product ion Scan

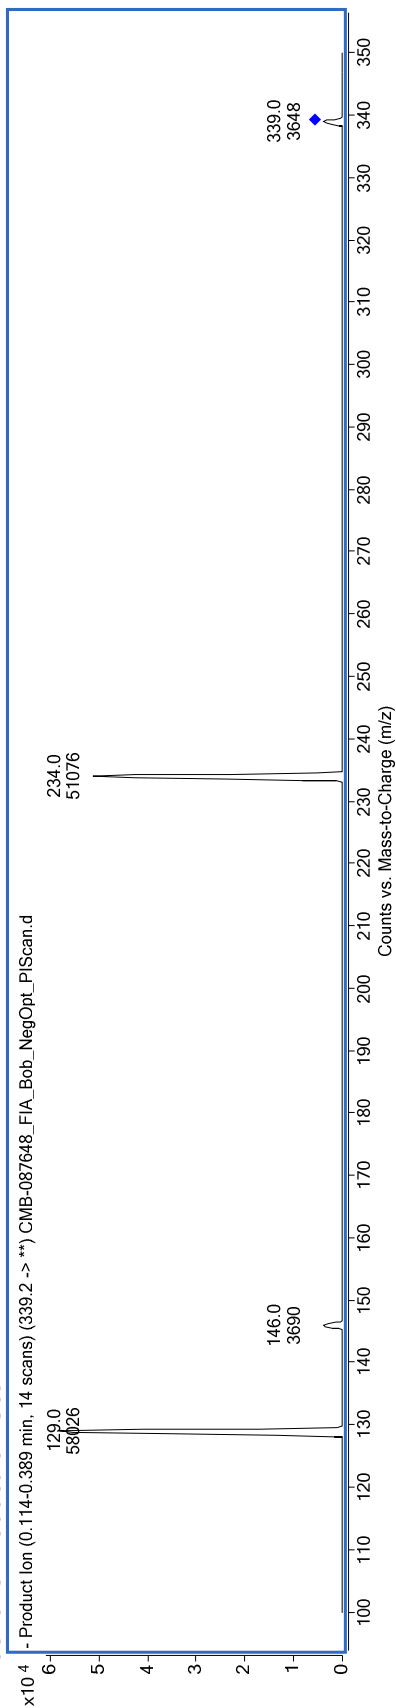

### CMB-087648 Sample chromatogram

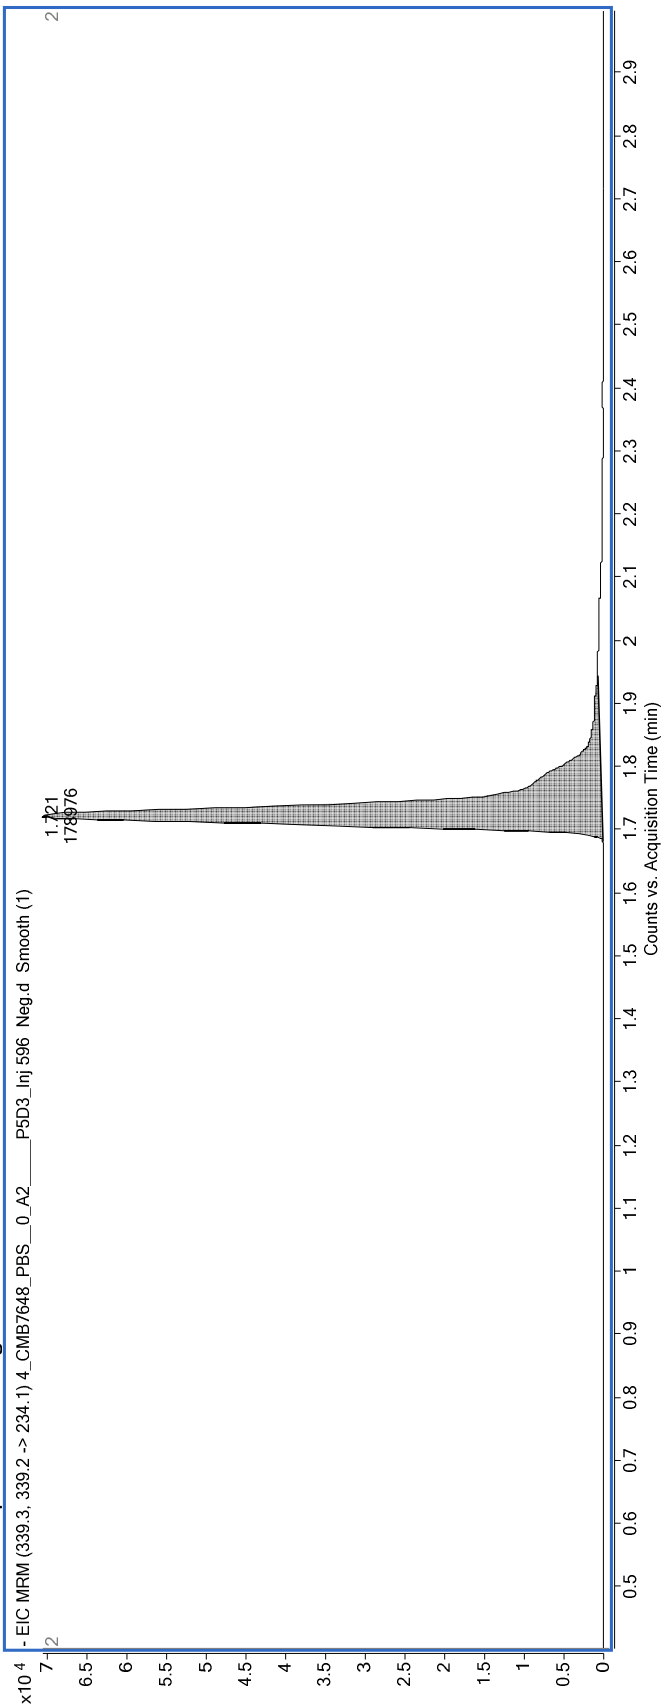

## Supporting Information - SP-2

| Compound | Apredica ID |
|----------|-------------|
| 1        | CAM-015-01  |

**TABLE OF CONTENTS**

|       |                                                    |    |
|-------|----------------------------------------------------|----|
| 1     | Objective.....                                     | 3  |
| 1.1   | Regulatory Guidelines.....                         | 3  |
| 2     | Test Articles.....                                 | 3  |
| 3     | Test Methods.....                                  | 4  |
| 3.1   | Analytical Methods.....                            | 4  |
| 3.1.1 | <i>Method development</i> .....                    | 4  |
| 3.1.2 | <i>Analysis</i> .....                              | 4  |
| 3.2   | In vitro ADME-Tox Experimental Conditions.....     | 4  |
| 3.2.1 | <i>Metabolite ID experimental conditions</i> ..... | 4  |
| 4     | Results.....                                       | 5  |
| 4.1   | Analytical.....                                    | 5  |
| 4.1.1 | <i>Method development</i> .....                    | 5  |
| 4.2   | In vitro ADME-Tox Summary.....                     | 5  |
| 4.2.1 | <i>Metabolite ID</i> .....                         | 5  |
| 4.3   | In vitro ADME-Tox Individual Data.....             | 6  |
| 4.3.1 | <i>Metabolite ID individual data</i> .....         | 6  |
| 5     | Storage and Retention of Records.....              | 10 |

# 1 Objective

The objective of this study was to identify potential metabolites

## 1.1 Regulatory Guidelines

This study was not conducted under US FDA Good Laboratory Practice Regulations (GLPs). Standard operating procedures of Apredica were used throughout the study.

# 2 Test Articles

| Apredica ID | Client ID  | Physical Form | Submitted FW | Parent MW | Stock solutions |
|-------------|------------|---------------|--------------|-----------|-----------------|
| CAM-015-01  | CMB-021805 | solid         | 336          | 336       | 50 mM DMSO      |

Test agent powders were stored at -20 °C. Stock solutions were stored at -20 °C.

## 3 Test Methods

Testing was performed at Apredica in Watertown, MA.

### 3.1 Analytical Methods

#### 3.1.1 Method development

The signal was optimized for each compound by ESI positive or negative ionization mode. A MS2 scan was used to identify the precursor ion and a product ion analysis was used to identify the best fragment for analysis and to optimize the collision energy. An ionization ranking was assigned indicating the compound's ease of ionization.

#### 3.1.2 Analysis

Samples were analyzed by LC/MS/MS using either an Agilent 6410 mass spectrometer coupled with an Agilent 1200 HPLC and a CTC PAL chilled autosampler, all controlled by MassHunter software (Agilent), or an ABI2000 mass spectrometer coupled with an Agilent 1100 HPLC and a CTC PAL chilled autosampler, all controlled by Analyst software (ABI). After separation on a C18 reverse phase HPLC column (Agilent, Waters, or equivalent) using an acetonitrile-water gradient system, peaks were analyzed by mass spectrometry (MS) using ESI ionization in MRM mode.

### 3.2 In vitro ADME-Tox Experimental Conditions

#### 3.2.1 Metabolite ID experimental conditions

Samples: Duplicate samples were prepared by incubating CMB-021805 at 50  $\mu$ M with 1 mg/mL mouse microsomal protein in 100 mM phosphate buffer containing 2 mM NADPH for 1 hr at 37 °C. The samples were quenched with 1 volume acetonitrile and centrifuged, and the supernatant was transferred to a vial for analysis. An NADPH-free control was prepared by omitting NADPH. A compound-free control was prepared by incubating microsomes and NADPH without compound for 1 hr, then adding the test agent.

LC/MS/MS: A 6 min acetonitrile-water gradient (containing 0.1% formic acid) was used to separate the metabolites. The major contaminants from microsomes and NADPH elute in the first minute, and signals from this background obscure the signals from any metabolites, so data from the first minute of the gradient were not analyzed. For the initial injections, a full-scan mass spectrum was obtained at each point along the gradient. Peaks in the TIC (total ion current) that are present in the NADPH-containing samples, but not in the controls, are indicative of potential metabolites. For the three metabolites identified, product ion scans across the gradient were obtained to look for fragments.

## 4 Results

### 4.1 Analytical

#### 4.1.1 Method development

The analytical method used in previous studies (CAM-016) was used for this study.

### 4.2 In vitro ADME-Tox Summary

#### 4.2.1 Metabolite ID

Three peaks corresponding to metabolites were identified. Two peaks with  $m/z$  351 in negative mode ionization and  $m/z$  353 in positive mode ionization, corresponding to oxidation products were identified. In addition, a peak with  $m/z$  335 in positive mode ionization was identified. Based on the spectral and chromatographic evidence outlined below, the following metabolites are proposed.

#### Potential Metabolites Identified

##### Parent

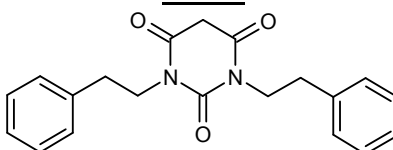

**CMB-021805**

$m/z=337 (M+H)^+$

##### Potential Metabolites

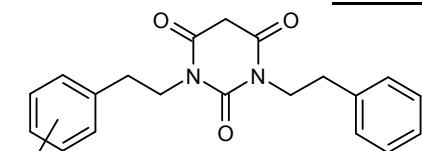

$m/z=353 (M+O+H)^+$

$m/z=351 (M+O-H)^-$

OR

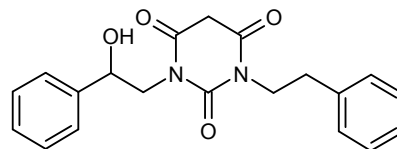

$m/z=353 (M+O+H)^+$

$m/z=351 (M+O-H)^-$

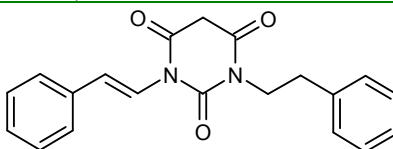

$m/z=335 (M-H_2+H)^+$

No conclusive evidence for other metabolites was observed.



### 4.3 In vitro ADME-Tox Individual Data

#### 4.3.1 Metabolite ID individual data

##### ESI- Full mass (MS2) Scans

ESI- mode ionization was examined, since the previous study showed that this was more sensitive than ESI+ mode. In the initial ESI- MS2 scan (see figure below), two peaks (labeled 1 and 2) corresponding to potential metabolites were observed (labeled Peak 1). The peak due to unmetabolized CMB-021805 at retention time (RT) 3.4 min is also observed. In this figure, the chromatograms from two samples incubated with NADPH, the NADPH-free control is shown in red, and the microsomes alone control are shown. The broad peak at RT=1.2 min, and the shoulder on the CMB-021805 peak at RT = 3.5 min (indicated with the triangle) are due to microsomal degradation of NADPH, and appear in the controls as well (third and fourth scans).

##### ESI- MS2 Scan BPC (two+NADPH samples in black, -NADPH control, microsomes alone control top-to-bottom)

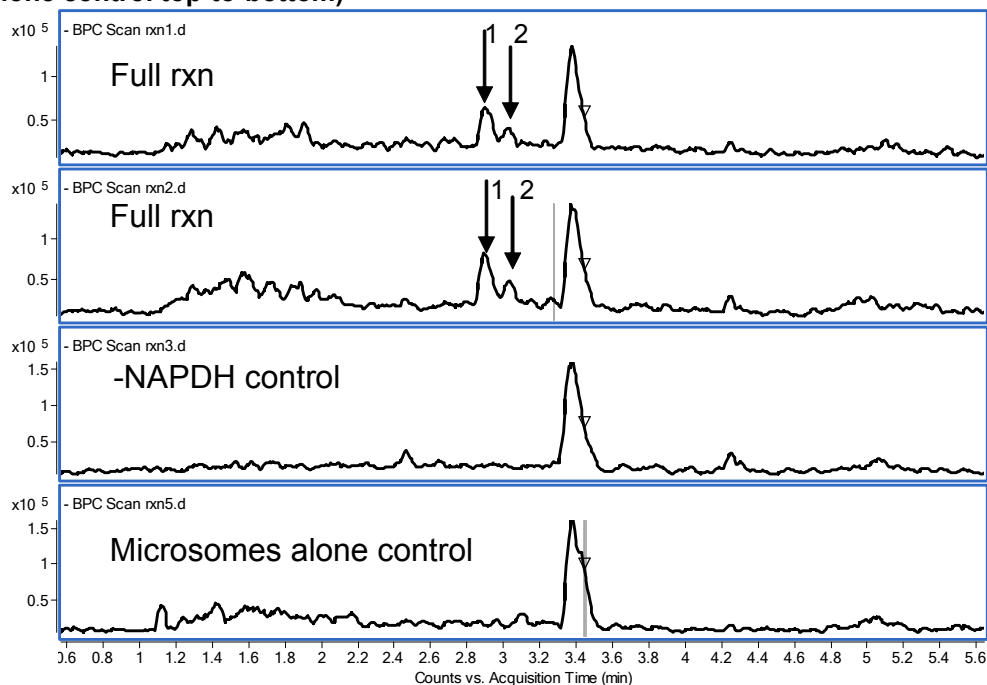

Mass spectra were examined for peaks 1 and 2. The results are shown below. Examination of the mass spectra for peak 1 and 2 shows fragments with m/z. These correspond to the singly oxidized metabolites of CMB-021805.

**Peak 1, (+NADPH sample in black)**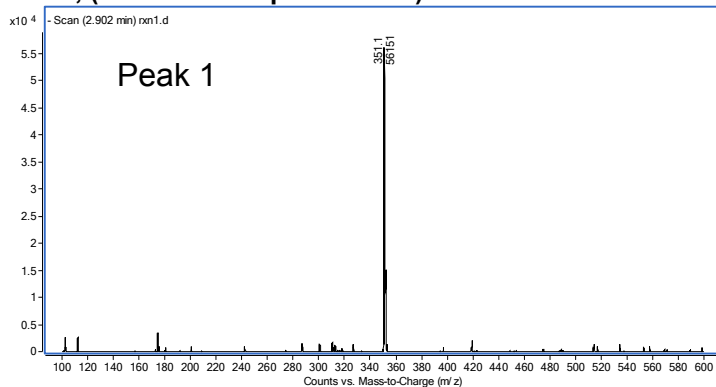**Peak 2, (+NADPH sample in black)**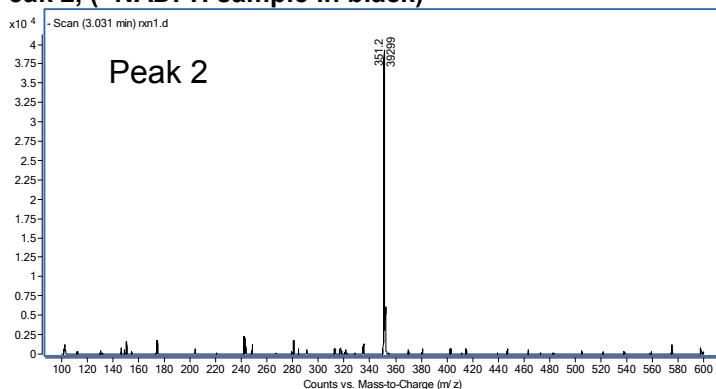**Product Ion (Fragmentation) Scans**

Product-ion scans were used to determine the mass spectral fragments of the  $m/z$  351 peaks 1 and 2 (see next figure). Both peaks show peaks of  $m/z$  247 and  $m/z$  231, corresponding to loss of non-oxidized and oxidized phenethyl group from oxidized parent.

**Product ion spectra (ESI- ionization)** for Peak 1 (top panel), and Peak 2 (middle panel) and CMB-021805 (bottom panel). Different panes in the panel show spectra at different collision energies.

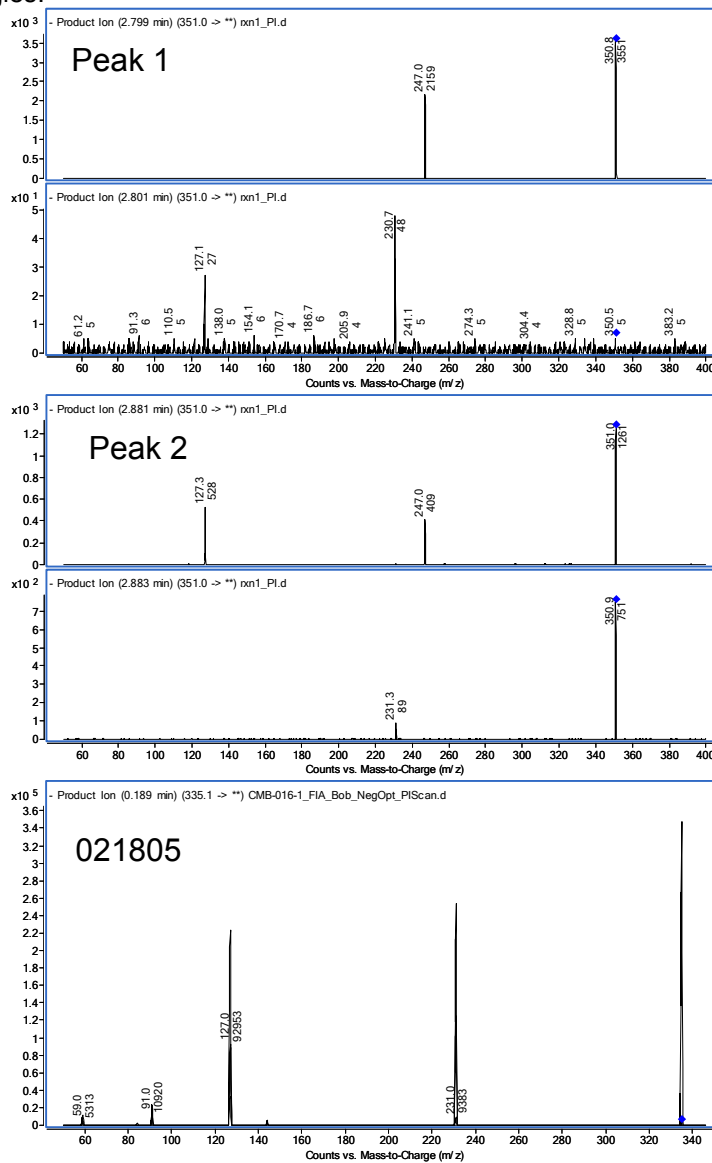

### ESI+ Full mass (MS2) Scans

ESI+ mode ionization was examined, since the previous metabolite ID study identified oxidation desaturation products in ESI+ mode. The EIC (extracted ion spectra) of these scans corresponding to the m/z 353 (oxidation product) and m/z 335 (desaturation products) are shown in the following figure. These scans show that the desaturation product is present in mouse microsomes reactions, as well as in human. Both peaks identified in the ESI- scan are also seen in the ESI+ scan as well. The m/z 335 peak was too small to identify fragments in the product ion scan.

**EIC for m/z 353 (top panel) and m/z 335 (bottom panel) from ESI+ MS2 scans.** The black curve shows the metabolite reaction. The red curve shows the -NADPH control. The purple curve in the top panel shows the position of the negative mode peaks for reference.

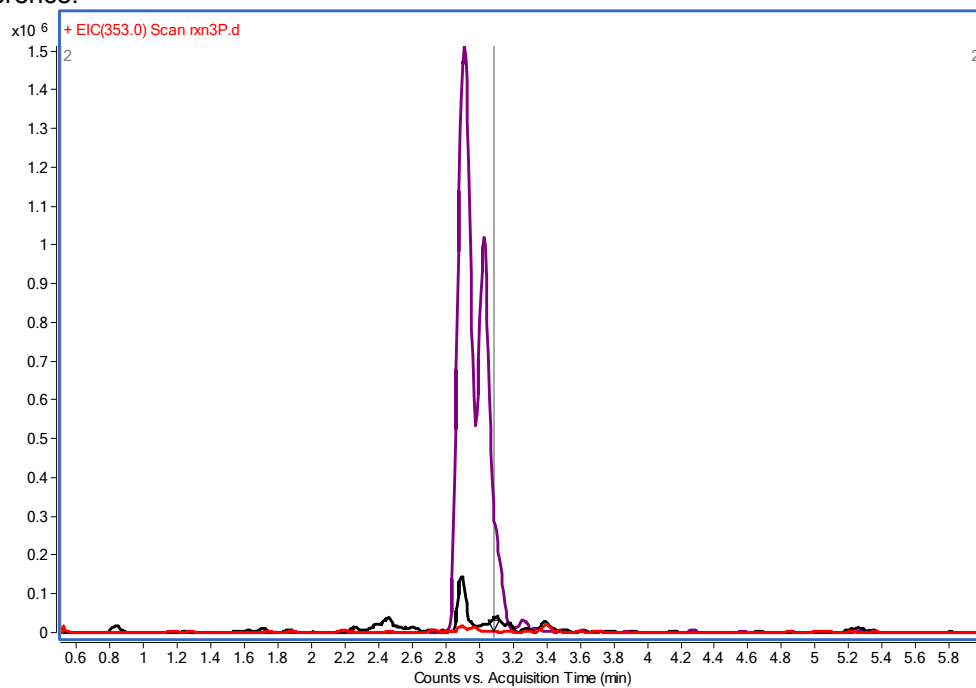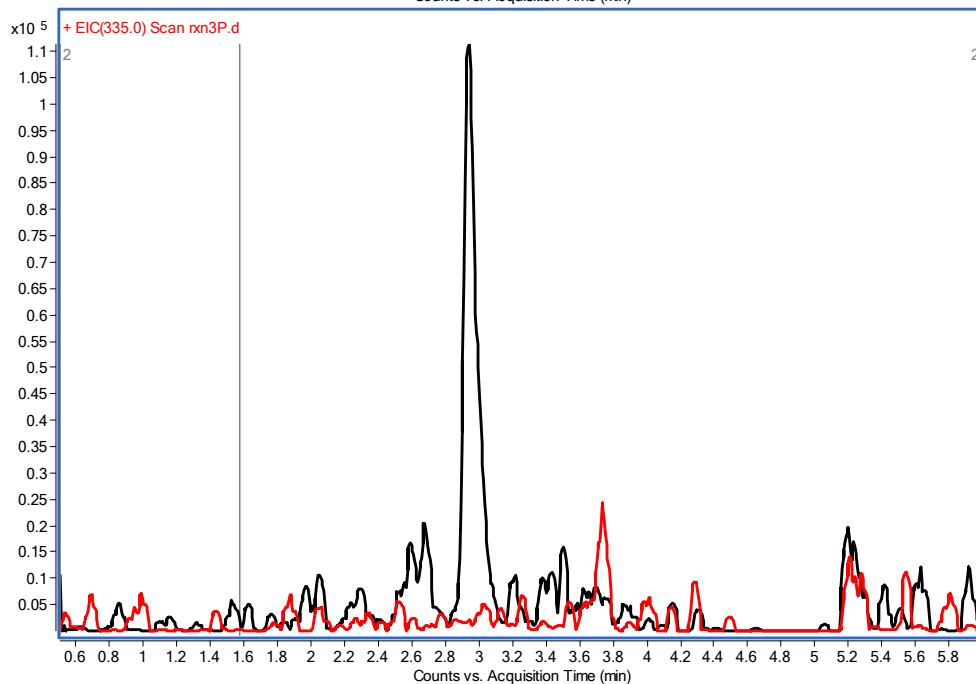

## **5 Storage and Retention of Records**

All documents generated in this study (raw data, the study plan, a copy of this report, etc.) will be stored for three years from the date of this document. Only authorized Apredica employees will have access to the archives.

The original final report will be provided to the sponsor and will be kept by the sponsor under its sole responsibility.

## Supporting Information - SP-3

| Compound | Apredica ID |
|----------|-------------|
| 1        | CAM-016-01  |
| 6        | CAM-016-02  |
| 2        | CAM-016-03  |
| 5        | CAM-016-04  |

## TABLE OF CONTENTS

|       |                                                                      |    |
|-------|----------------------------------------------------------------------|----|
| 1     | Objective.....                                                       | 3  |
| 1.1   | Regulatory Guidelines.....                                           | 3  |
| 2     | Test Articles.....                                                   | 3  |
| 3     | Test Methods.....                                                    | 4  |
| 3.1   | Analytical Methods.....                                              | 4  |
| 3.1.1 | <i>Method development</i> .....                                      | 4  |
| 3.1.2 | <i>Analysis</i> .....                                                | 4  |
| 3.2   | In vitro ADME-Tox Experimental Conditions.....                       | 4  |
| 3.2.1 | <i>PBS solubility experimental conditions</i> .....                  | 4  |
| 3.2.2 | <i>Caco-2 monolayer permeability experimental conditions</i> .....   | 4  |
| 3.2.3 | <i>PBS stability experimental conditions</i> .....                   | 4  |
| 3.2.4 | <i>Plasma stability experimental conditions</i> .....                | 5  |
| 3.2.5 | <i>Microsomal stability experimental conditions</i> .....            | 5  |
| 4     | Results.....                                                         | 6  |
| 4.1   | Analytical.....                                                      | 6  |
| 4.1.1 | <i>Method development</i> .....                                      | 6  |
| 4.2   | In vitro ADME-Tox Summary.....                                       | 7  |
| 4.2.1 | <i>PBS express solubility summary</i> .....                          | 7  |
| 4.2.2 | <i>Caco-2 permeability summary</i> .....                             | 7  |
| 4.2.3 | <i>Buffer half-life summary</i> .....                                | 8  |
| 4.2.4 | <i>Plasma half-life summary</i> .....                                | 8  |
| 4.2.5 | <i>Microsomal intrinsic clearance summary</i> .....                  | 9  |
| 4.3   | In vitro ADME-Tox Individual Data.....                               | 10 |
| 4.3.1 | <i>PBS express solubility individual data</i> .....                  | 10 |
| 4.3.2 | <i>Caco-2 permeability individual data</i> .....                     | 12 |
| 4.3.3 | <i>Buffer half-life individual data</i> .....                        | 13 |
| 4.3.4 | <i>Plasma half-life individual data</i> .....                        | 14 |
| 4.3.5 | <i>Microsomal intrinsic clearance individual data</i> .....          | 15 |
| 5     | References.....                                                      | 19 |
| 6     | Storage and Retention of Records.....                                | 20 |
| 7     | Appendices.....                                                      | 21 |
| 7.1   | Appendix A. Standard Aprecica Methods.....                           | 21 |
| 7.2   | Appendix B. Sample Spectra and Chromatograms of the Test Agents..... | 23 |

## 1 Objective

The objective of this study is to evaluate the *in vitro* ADME properties of the test agents.

### 1.1 Regulatory Guidelines

This study was not conducted under US FDA Good Laboratory Practice Regulations (GLPs). Standard operating procedures of Apredica were used throughout the study.

## 2 Test Articles

| Apredica ID | Client ID | Physical Form | Submitted FW | Parent MW | Stock solutions                           |
|-------------|-----------|---------------|--------------|-----------|-------------------------------------------|
| CAM-016-01  | 21805 (1) | solid         | 336          | 336       | 50 mM DMSO, very slightly yellow in color |
| CAM-016-02  | (2)       | solid         | 372.37       | 372       | 50 mM DMSO, very slightly yellow in color |
| CAM-016-03  | (3)       | solid         | 408.36       | 408       | 50 mM DMSO, pale orange in color          |
| CAM-016-04  | (4)       | solid         | 444.34       | 444       | 50 mM DMSO, pale yellow in color          |

Test agent powders were stored at -20 °C. Stock solutions were stored at -20 °C.



### 3 Test Methods

Testing was performed at Apredica in Watertown, MA.

#### 3.1 Analytical Methods

##### 3.1.1 Method development

The signal was optimized for each compound by ESI positive or negative ionization mode. A MS2 scan was used to identify the precursor ion and a product ion analysis was used to identify the best fragment for analysis and to optimize the collision energy. An ionization ranking was assigned indicating the compound's ease of ionization.

##### 3.1.2 Analysis

Samples were analyzed by LC/MS/MS using either an Agilent 6410 mass spectrometer coupled with an Agilent 1200 HPLC and a CTC PAL chilled autosampler, all controlled by MassHunter software (Agilent), or an ABI2000 mass spectrometer coupled with an Agilent 1100 HPLC and a CTC PAL chilled autosampler, all controlled by Analyst software (ABI). After separation on a C18 reverse phase HPLC column (Agilent, Waters, or equivalent) using an acetonitrile-water gradient system, peaks were analyzed by mass spectrometry (MS) using ESI ionization in MRM mode.

#### 3.2 In vitro ADME-Tox Experimental Conditions

Additional protocol details are given in Appendix A.

##### 3.2.1 PBS solubility experimental conditions

| Apredica ID | Client ID | Test conc      | Medium           | Incubation | Ref. comp. | Analytical method |
|-------------|-----------|----------------|------------------|------------|------------|-------------------|
| CAM-016-01  | 21805 (1) | 500, 250.      |                  | 45 min,    | tamoxifen  |                   |
| CAM-016-02  | (2)       | 125, 63,       | PBS <sup>a</sup> | 16 hr      | reserpine  | UV/Vis            |
| CAM-016-03  | (3)       | 31, 16,        |                  | RT         | verapamil  |                   |
| CAM-016-04  | (4)       | 7.8,<br>3.9 µM |                  |            |            |                   |

<sup>a</sup>PBS is Ca<sup>2+</sup>, Mg<sup>2+</sup>-free phosphate-buffered saline, pH 7.2.

##### 3.2.2 Caco-2 monolayer permeability experimental conditions

| Apredica ID | Client ID | Test conc. | Assay Time | Direction | Reference compounds | Analytical method |
|-------------|-----------|------------|------------|-----------|---------------------|-------------------|
| CAM-016-01  | 21805 (1) |            |            |           |                     |                   |
| CAM-016-02  | (2)       | 50 µM      | 2 hr       | A->B      | warfarin            | LC/MS/MS          |
| CAM-016-03  | (3)       |            |            | B->A      | ranitidine          |                   |
| CAM-016-04  | (4)       |            |            |           |                     |                   |

##### 3.2.3 PBS stability experimental conditions

| Apredica ID | Client ID | Test conc | Medium           | Incubation | Ref. comp.     | Analytical method |
|-------------|-----------|-----------|------------------|------------|----------------|-------------------|
| CAM-016-01  | 21805 (1) |           |                  | 0, 10,     |                |                   |
| CAM-016-02  | (2)       | 5 µM      | PBS <sup>a</sup> | 20, 40,    | proprantheline | LC/MS/MS          |
| CAM-016-03  | (3)       |           |                  | 60 min     |                |                   |
| CAM-016-04  | (4)       |           |                  | 37 °C      |                |                   |

<sup>a</sup>PBS is Ca<sup>2+</sup>, Mg<sup>2+</sup>-free phosphate-buffered saline, pH 7.2.

### 3.2.4 Plasma stability experimental conditions

| Apredica ID | Client ID | Test conc. | Plasma source    | Incubation | Reference compounds | Analytical method |
|-------------|-----------|------------|------------------|------------|---------------------|-------------------|
| CAM-016-01  | 21805 (1) |            |                  | 0, 10,     |                     |                   |
| CAM-016-02  | (2)       | 5 $\mu$ M  | PBS <sup>a</sup> | 20, 40,    | propranolol         | LC/MS/MS          |
| CAM-016-03  | (3)       |            |                  | 60 min     |                     |                   |
| CAM-016-04  | (4)       |            |                  | 37 °C      |                     |                   |

### 3.2.5 Microsomal stability experimental conditions

| Apredica ID | Client ID | Test conc. | Micro-some source | Protein conc. | Incubation | Ref. comp. | Analytical method |
|-------------|-----------|------------|-------------------|---------------|------------|------------|-------------------|
| CAM-016-01  | 21805 (1) |            |                   |               | 0, 10,     |            |                   |
| CAM-016-02  | (2)       | 5 $\mu$ M  | human,            | 0.3 mg/       | 20, 40,    | verapamil  | LC/MS/MS          |
| CAM-016-03  | (3)       |            | mouse             | mL            | 60 min     | warfarin   |                   |
| CAM-016-04  | (4)       |            |                   |               | 37 °C      |            |                   |

## 4 Results

### 4.1 Analytical

#### 4.1.1 Method development

| Client ID | MW  | Polarization | Precursor m/z | Product m/z | Collision energy (V) | Ionization classification <sup>a</sup> |
|-----------|-----|--------------|---------------|-------------|----------------------|----------------------------------------|
| 21805 (1) | 336 | neg          | 335.1         | 231.1       | 18                   | 1                                      |
| (2)       | 372 | neg          | 371.1         | 127.0       | 26                   | 1                                      |
| (3)       | 408 | neg          | 407.1         | 136.1       | 34                   | 1                                      |
| (4)       | 444 | neg          | 443.1         | 154.1       | 38                   | 1                                      |

<sup>a</sup>Ionization classification:

1 = Highly ionizable

2 = Intermediately ionizable

3 = Poorly ionizable

The full scan mass spectrum, the product ion spectrum, and a sample chromatogram are shown in Appendix B.

## 4.2 In vitro ADME-Tox Summary

### 4.2.1 PBS express solubility summary

| Client ID | Medium | Solubility limit ( $\mu\text{M}$ ) <sup>a</sup> |            | comment                                   |
|-----------|--------|-------------------------------------------------|------------|-------------------------------------------|
|           |        | 45 min                                          | 16 hr      |                                           |
| Tamoxifen | PBS    | 15.6                                            | 31.3       | low solubility control                    |
| Reserpine | PBS    | 15.6                                            | 15.6       | low solubility control                    |
| Verapamil | PBS    | $\geq 500$                                      | $\geq 500$ | high solubility control                   |
| 21085 (1) | PBS    | 62.5                                            | 62.5       |                                           |
| (2)       | PBS    | 31.3                                            | 31.3       |                                           |
| (3)       | PBS    | $\geq 500$                                      | 250        | fibrous ppt at highest conc at 16 hr      |
| (4)       | PBS    | 250                                             | 125        | fibrous ppt at highest two concs at 16 hr |

<sup>a</sup>Solubility limit is highest concentration with no detectable precipitate.

Visible inspection of wells at 16 hr time showed cloudiness (fine precipitate) at concentrations that agree with UV determination, except as noted. See individual data below for UV data.

### 4.2.2 Caco-2 permeability summary

| Client ID  | test conc ( $\mu\text{M}$ ) | Assay duration (hr) | mean A->B $P_{\text{app}}^{\text{a}}$ ( $10^{-6} \text{ cm s}^{-1}$ ) | mean B->A $P_{\text{app}}^{\text{a}}$ ( $10^{-6} \text{ cm s}^{-1}$ ) | Asymmetry ratio <sup>b</sup> | comment                   |
|------------|-----------------------------|---------------------|-----------------------------------------------------------------------|-----------------------------------------------------------------------|------------------------------|---------------------------|
| Ranitidine | 50                          | 2                   | 1.2                                                                   | 2.9                                                                   | 2.4                          | low permeability control  |
| Warfarin   | 50                          | 2                   | 44.3                                                                  | 16.9                                                                  | 0.4                          | high permeability control |
| 21085 (1)  | 50                          | 2                   | 73.4                                                                  | 26.0                                                                  | 0.4                          |                           |
| (2)        | 50                          | 2                   | 66.3                                                                  | 17.1                                                                  | 0.3                          |                           |
| (3)        | 50                          | 2                   | 60.7                                                                  | 14.0                                                                  | 0.2                          |                           |
| (4)        | 50                          | 2                   | 51.7                                                                  | 10.5                                                                  | 0.2                          |                           |

<sup>a</sup>Apparent permeability

<sup>b</sup> $P_{\text{app}}(\text{B->A}) / P_{\text{app}}(\text{A->B})$

### 4.2.3 Buffer half-life summary

| Client ID             | Test conc (µM) | Medium           | Buffer T <sub>1/2</sub> <sup>a</sup> (min) | Fraction remaining, last time point (%) | comment        |
|-----------------------|----------------|------------------|--------------------------------------------|-----------------------------------------|----------------|
| <b>Proprantheline</b> | 5.0            | PBS <sup>b</sup> | >60                                        | 80.9%                                   | stable control |
| CMB-087250            | 5.0            | PBS <sup>b</sup> | >60                                        | 110.4%                                  |                |
| CMB-087251            | 5.0            | PBS <sup>b</sup> | >60                                        | 86.5%                                   |                |
| CMB-005304            | 5.0            | PBS <sup>b</sup> | >60                                        | 107.8%                                  |                |
| CMB-050384-3          | 5.0            | PBS <sup>b</sup> | >60                                        | 98.5%                                   |                |

<sup>a</sup>Half-life

<sup>b</sup>PBS is Ca<sup>2+</sup>, Mg<sup>2+</sup>-free phosphate-buffered saline, pH 7.2.

### 4.2.4 Plasma half-life summary

| Client ID             | test conc (µM) | test species | Plasma T <sub>1/2</sub> <sup>a</sup> (min) | Fraction remaining, last time point (%) | comment              |
|-----------------------|----------------|--------------|--------------------------------------------|-----------------------------------------|----------------------|
| <b>Proprantheline</b> | 5.0            | Mouse Plasma | 30.3                                       | 23.3%                                   | metabolized control  |
| <b>21085 (1)</b>      | 5.0            | Mouse Plasma | 60.5                                       | 47.1%                                   | Calc T1/2 =60.5 min  |
| <b>(2)</b>            | 5.0            | Mouse Plasma | >60                                        | 69.5%                                   | Calc T1/2 =131.2 min |
| <b>(3)</b>            | 5.0            | Mouse Plasma | >60                                        | 95.2%                                   | Calc T1/2 =>1000 min |
| <b>(4)</b>            | 5.0            | Mouse Plasma | >60                                        | 101.3%                                  | Calc T1/2 =>1000 min |

<sup>a</sup>Half-life

Calculated half-life from the data is shown in the comment section. Calculated half-lives greater than twice the experimental duration have a limited reliability.

#### 4.2.5 Microsomal intrinsic clearance summary

| Client ID | test conc (µM) | test species | NADPH-dependent CL <sub>int</sub> <sup>a</sup> (µl min <sup>-1</sup> mg <sup>-1</sup> ) | NADPH-dependent T <sub>1/2</sub> <sup>b</sup> (min) | NADPH-free CL <sub>int</sub> <sup>a</sup> (µl min <sup>-1</sup> mg <sup>-1</sup> ) | NADPH-free T <sub>1/2</sub> <sup>b</sup> (min) | comment                    |
|-----------|----------------|--------------|-----------------------------------------------------------------------------------------|-----------------------------------------------------|------------------------------------------------------------------------------------|------------------------------------------------|----------------------------|
| Verapamil | 1.0            | Human        | 79.9                                                                                    | 28.9                                                | 0.0                                                                                | >180                                           | highly metabolized control |
| Verapamil | 1.0            | Mouse        | 260.4                                                                                   | 8.9                                                 | 0.0                                                                                | >180                                           | highly metabolized control |
| Warfarin  | 1.0            | Human        | 0.0                                                                                     | >180                                                | 0.0                                                                                | >180                                           | poorly metabolized control |
| Warfarin  | 1.0            | Mouse        | 0.0                                                                                     | >180                                                | 0.0                                                                                | >180                                           | poorly metabolized control |
| CAM-016-1 | 1.0            | Human        | 38                                                                                      | 61                                                  | 0                                                                                  | >180                                           |                            |
| CAM-016-1 | 1.0            | Mouse        | 60                                                                                      | 39                                                  | 1                                                                                  | >180                                           |                            |
| CAM-016-2 | 1.0            | Human        | 74                                                                                      | 31                                                  | 4                                                                                  | >180                                           |                            |
| CAM-016-2 | 1.0            | Mouse        | 103                                                                                     | 22                                                  | 3                                                                                  | >180                                           |                            |
| CAM-016-3 | 1.0            | Human        | 5                                                                                       | >180                                                | 0                                                                                  | >180                                           |                            |
| CAM-016-3 | 1.0            | Mouse        | 54                                                                                      | 43                                                  | 0                                                                                  | >180                                           |                            |
| CAM-016-4 | 1.0            | Human        | 12                                                                                      | >180                                                | 0                                                                                  | >180                                           |                            |
| CAM-016-4 | 1.0            | Mouse        | 118                                                                                     | 20                                                  | 1                                                                                  | >180                                           |                            |

<sup>a</sup>Microsomal Intrinsic Clearance

<sup>b</sup>Half-life

### **4.3 In vitro ADME-Tox Individual Data**

#### **4.3.1 PBS express solubility individual data**

Values with OD 540 higher than the limit of significance (mean +3 SD for vehicle-treated samples) are indicated in red. Missing points represent unreliable data that were not included in the analysis. For test agent (3), there was a visible fibrous precipitate at the highest concentration in both wells, so this concentration was scored positive for the presence of precipitate.

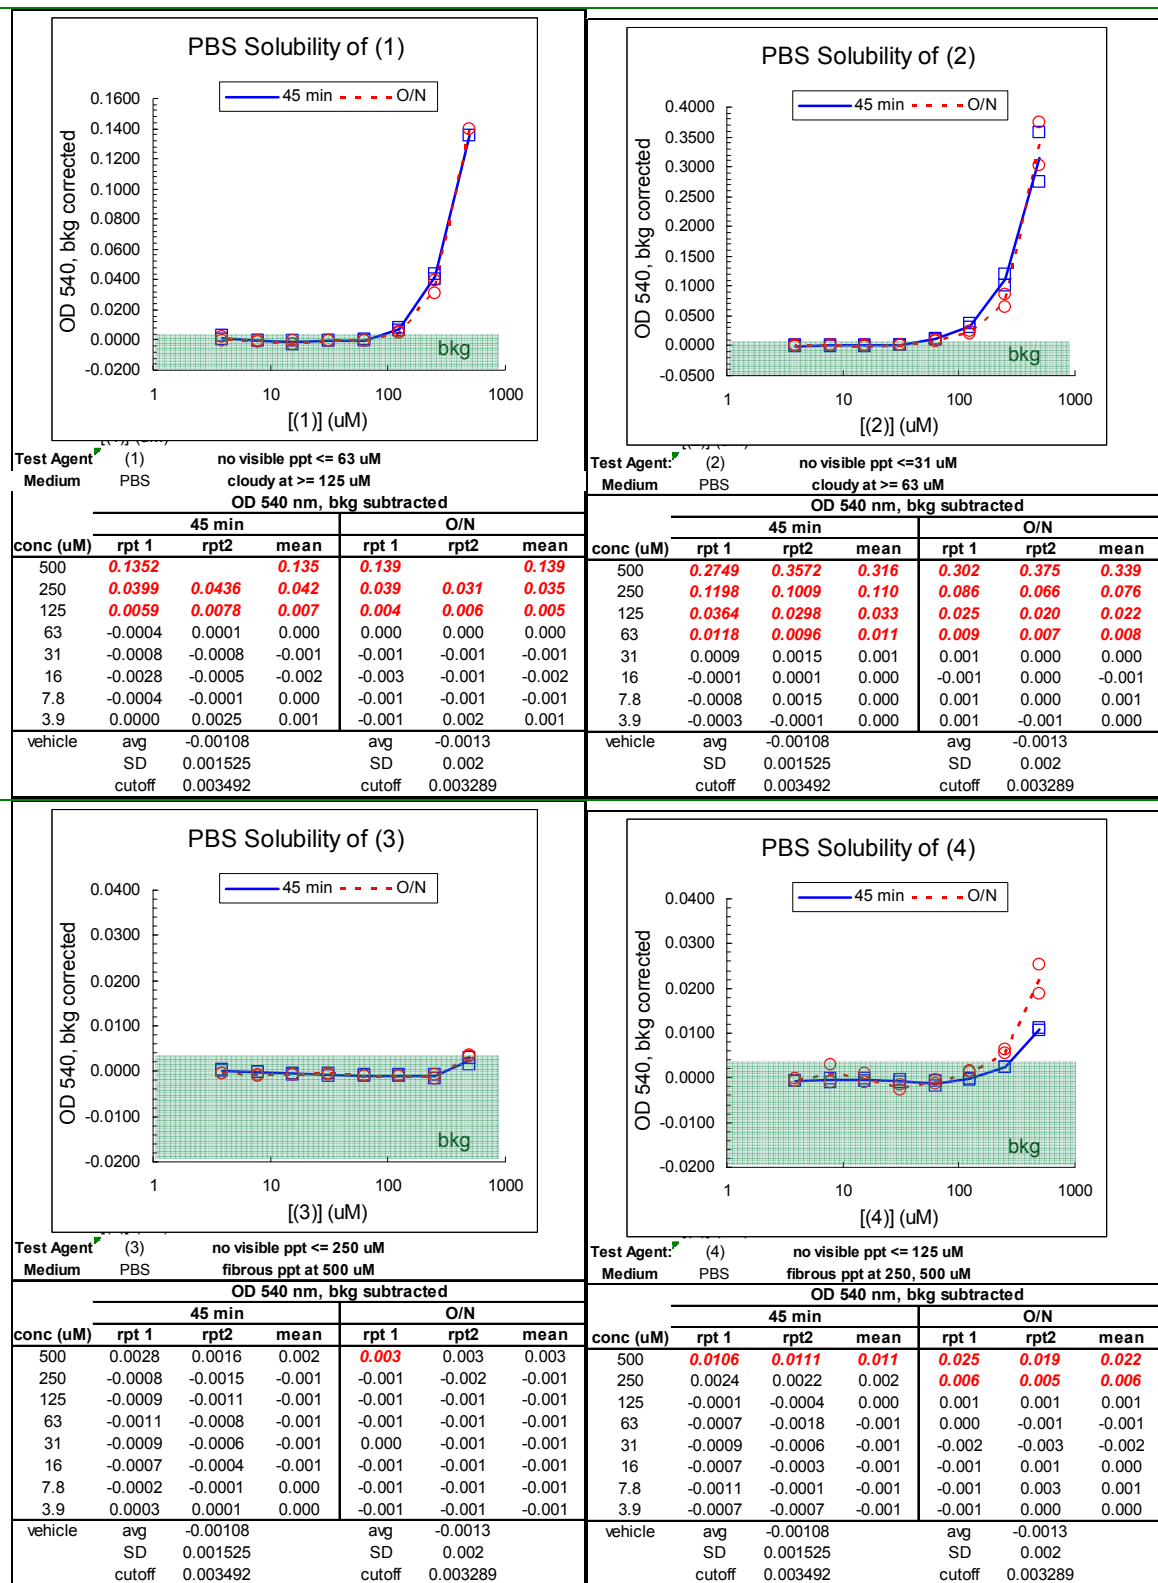



### 4.3.2 Caco-2 permeability individual data

| <i>Client ID</i> | <i>test conc (μM)</i> | <i>direction</i> | <i>value</i>                     | <i>1<sup>st</sup></i> | <i>2<sup>nd</sup></i> | <i>mean</i> | <i>comment</i> |
|------------------|-----------------------|------------------|----------------------------------|-----------------------|-----------------------|-------------|----------------|
| <b>1</b>         | 50                    | A->B             | dQ/dt <sup>a</sup>               | 1.0E-03               | 9.0E-04               | 9.6E-04     |                |
|                  |                       | A->B             | <b>C<sub>0</sub><sup>b</sup></b> | 40.3                  | 39.4                  | 39.8        |                |
|                  |                       | B->A             | dQ/dt <sup>a</sup>               | 3.5E-04               | 3.1E-04               | 3.3E-04     |                |
|                  |                       | B->A             | <b>C<sub>0</sub><sup>b</sup></b> | 38.9                  | 38.1                  | 38.5        |                |
| <b>2</b>         | 50                    | A->B             | dQ/dt <sup>a</sup>               | 2.4E-03               | 2.0E-03               | 2.2E-03     |                |
|                  |                       | A->B             | <b>C<sub>0</sub><sup>b</sup></b> | 99.8                  | 102.9                 | 101.4       |                |
|                  |                       | B->A             | dQ/dt <sup>a</sup>               | 5.9E-04               | 5.6E-04               | 5.8E-04     |                |
|                  |                       | B->A             | <b>C<sub>0</sub><sup>b</sup></b> | 99.9                  | 105.2                 | 102.5       |                |
| <b>3</b>         | 50                    | A->B             | dQ/dt <sup>a</sup>               | 1.9E-03               | 1.7E-03               | 1.8E-03     |                |
|                  |                       | A->B             | <b>C<sub>0</sub><sup>b</sup></b> | 87.1                  | 93.6                  | 90.4        |                |
|                  |                       | B->A             | dQ/dt <sup>a</sup>               | 4.1E-04               | 4.3E-04               | 4.2E-04     |                |
|                  |                       | B->A             | <b>C<sub>0</sub><sup>b</sup></b> | 92.6                  | 87.5                  | 90.0        |                |
| <b>4</b>         | 50                    | A->B             | dQ/dt <sup>a</sup>               | 3.0E-03               | 2.6E-03               | 2.8E-03     |                |
|                  |                       | A->B             | <b>C<sub>0</sub><sup>b</sup></b> | 159.5                 | 168.8                 | 164.2       |                |
|                  |                       | B->A             | dQ/dt <sup>a</sup>               | 5.1E-04               | 6.0E-04               | 5.6E-04     |                |
|                  |                       | B->A             | <b>C<sub>0</sub><sup>b</sup></b> | 164.8                 | 158.4                 | 161.6       |                |

<sup>a</sup>rate of test agent permeation, area units/sec

<sup>b</sup>initial concentration (area units/cm<sup>3</sup>)

### 4.3.3 Buffer half-life individual data

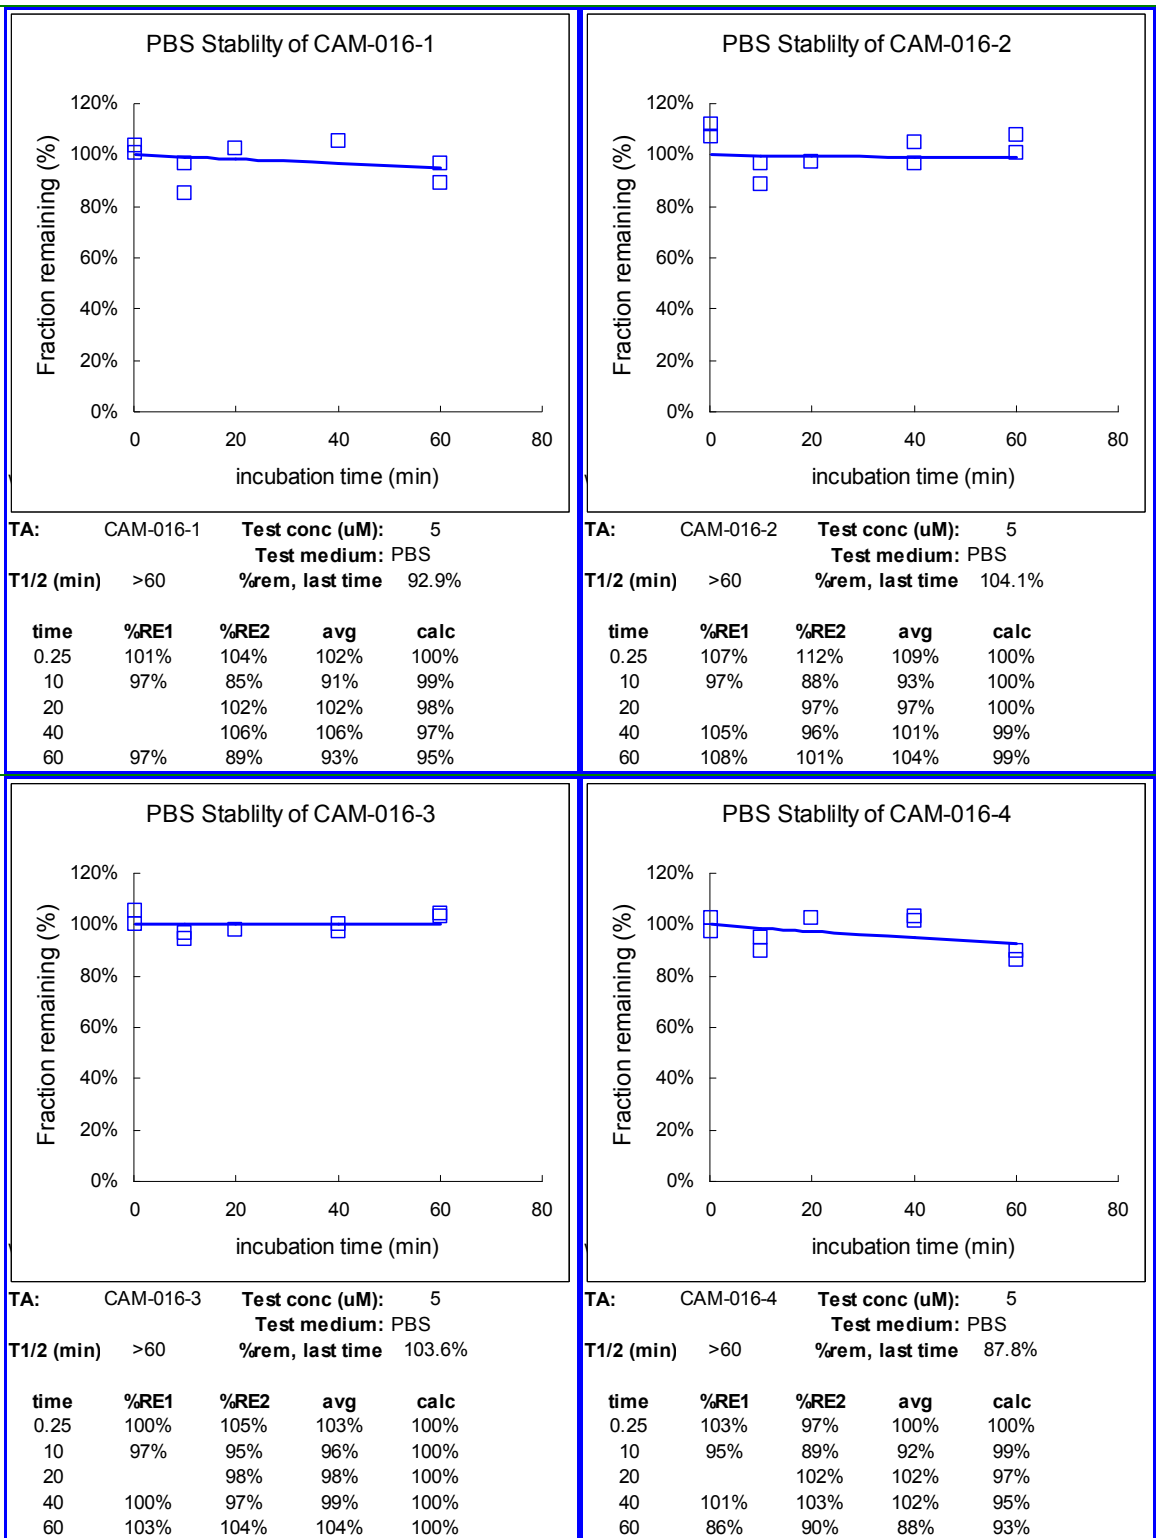

### 4.3.4 Plasma half-life individual data

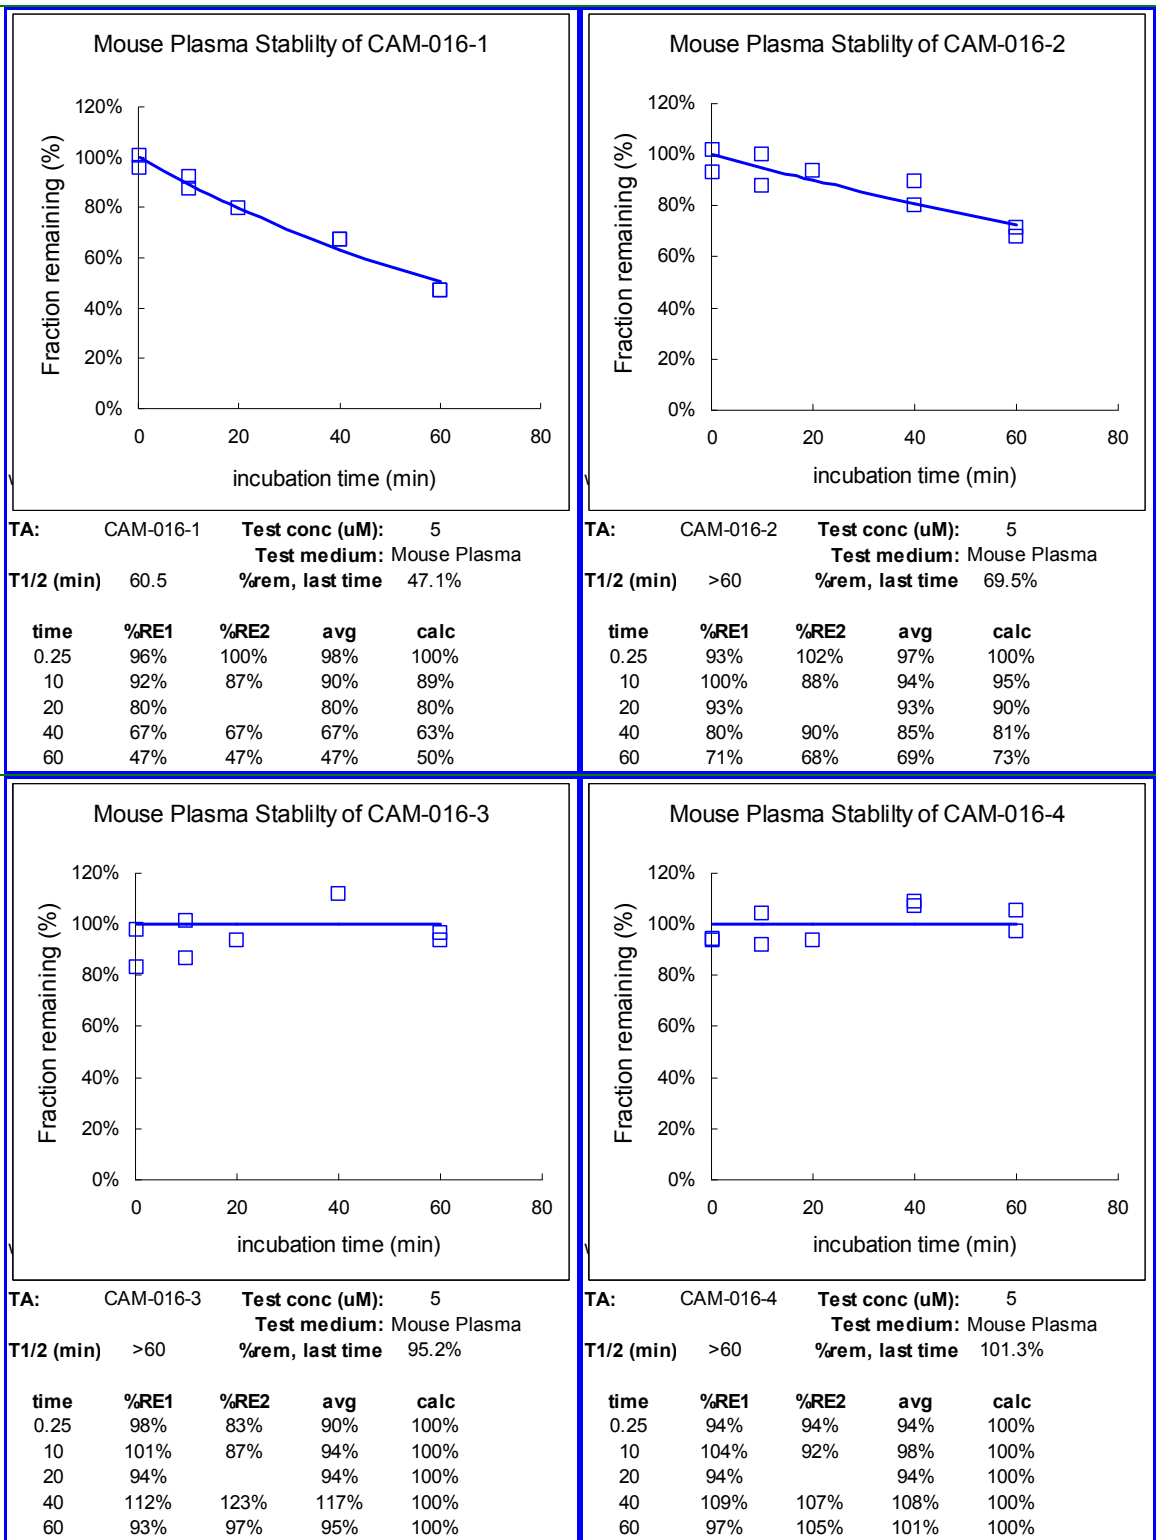

### 4.3.5 Microsomal intrinsic clearance individual data

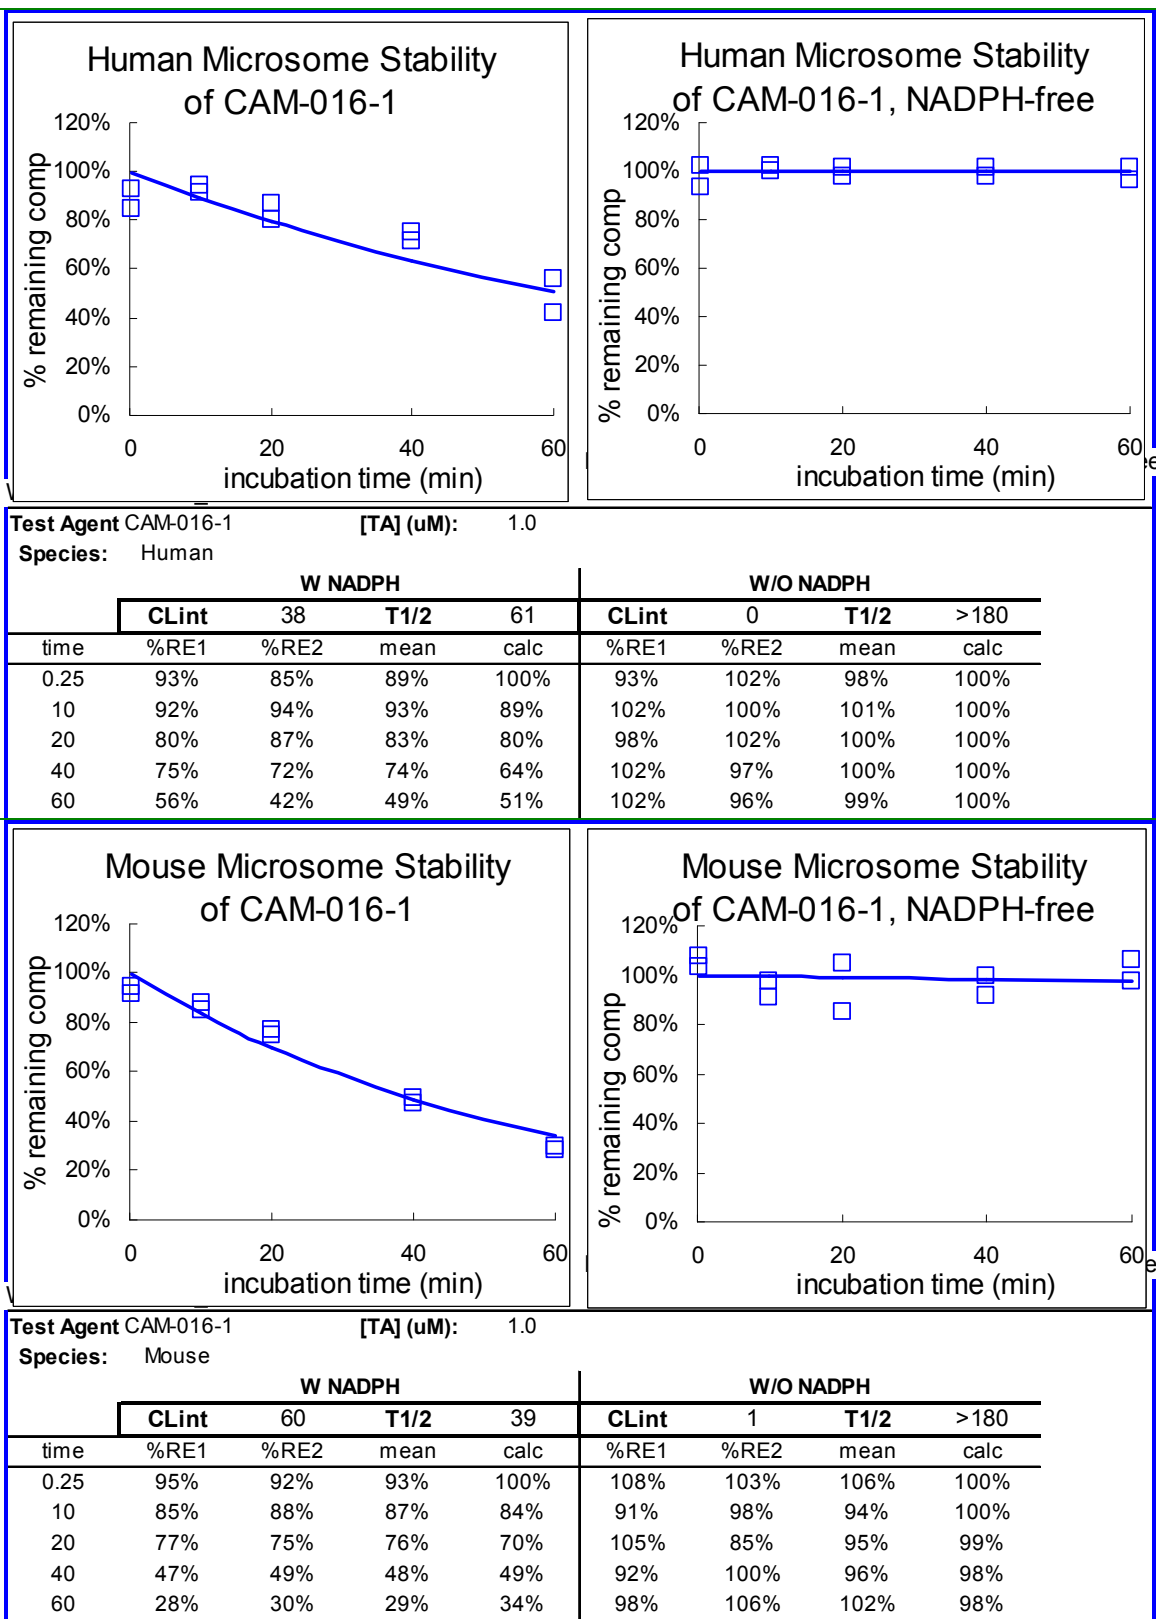

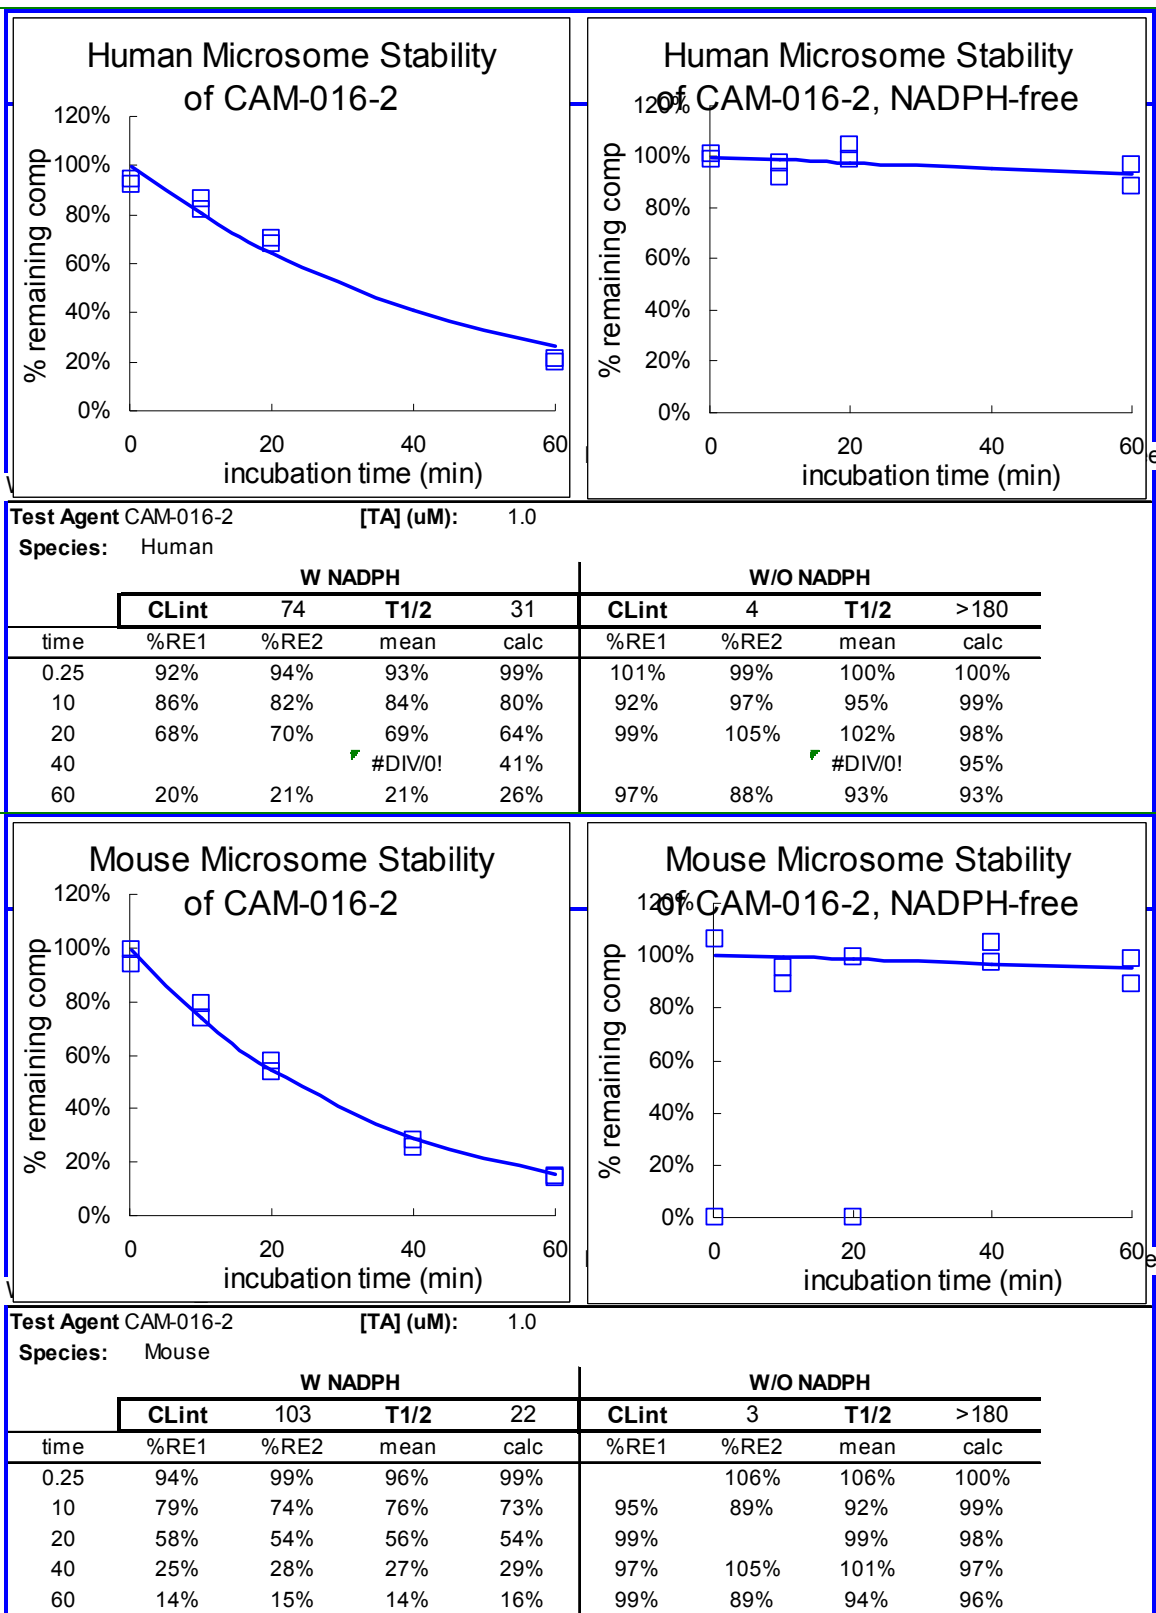

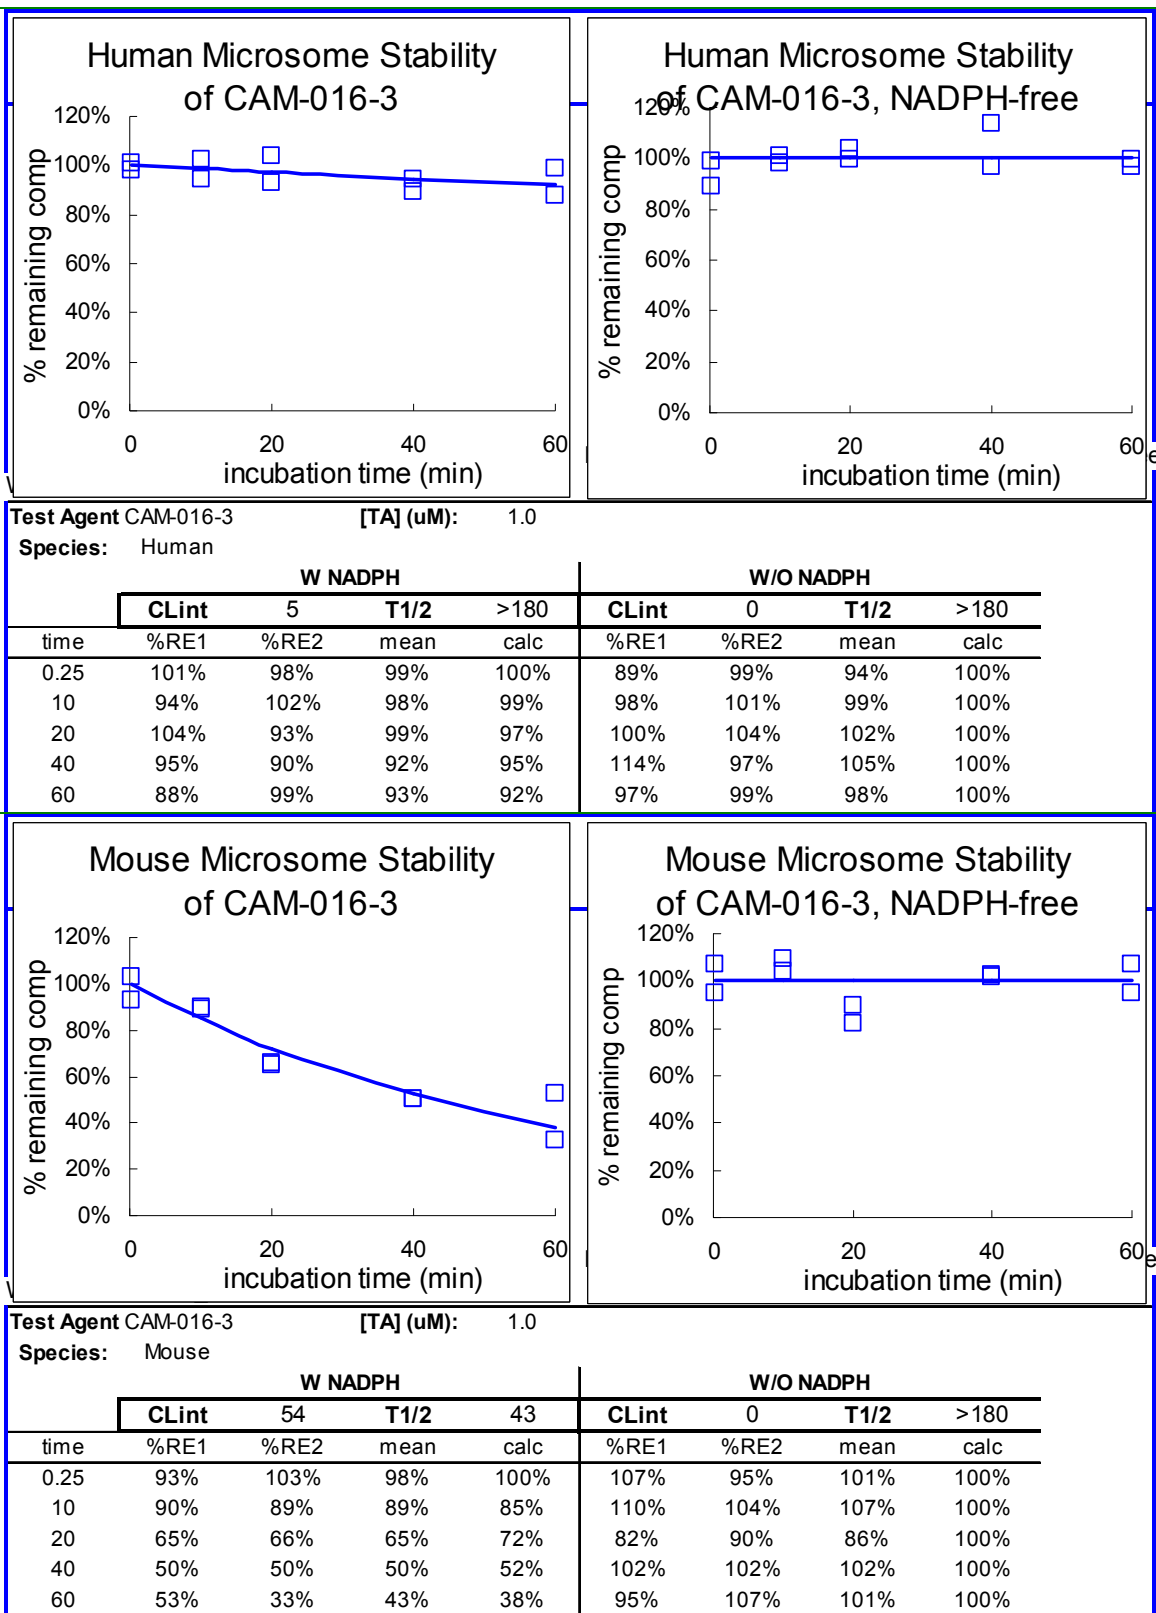

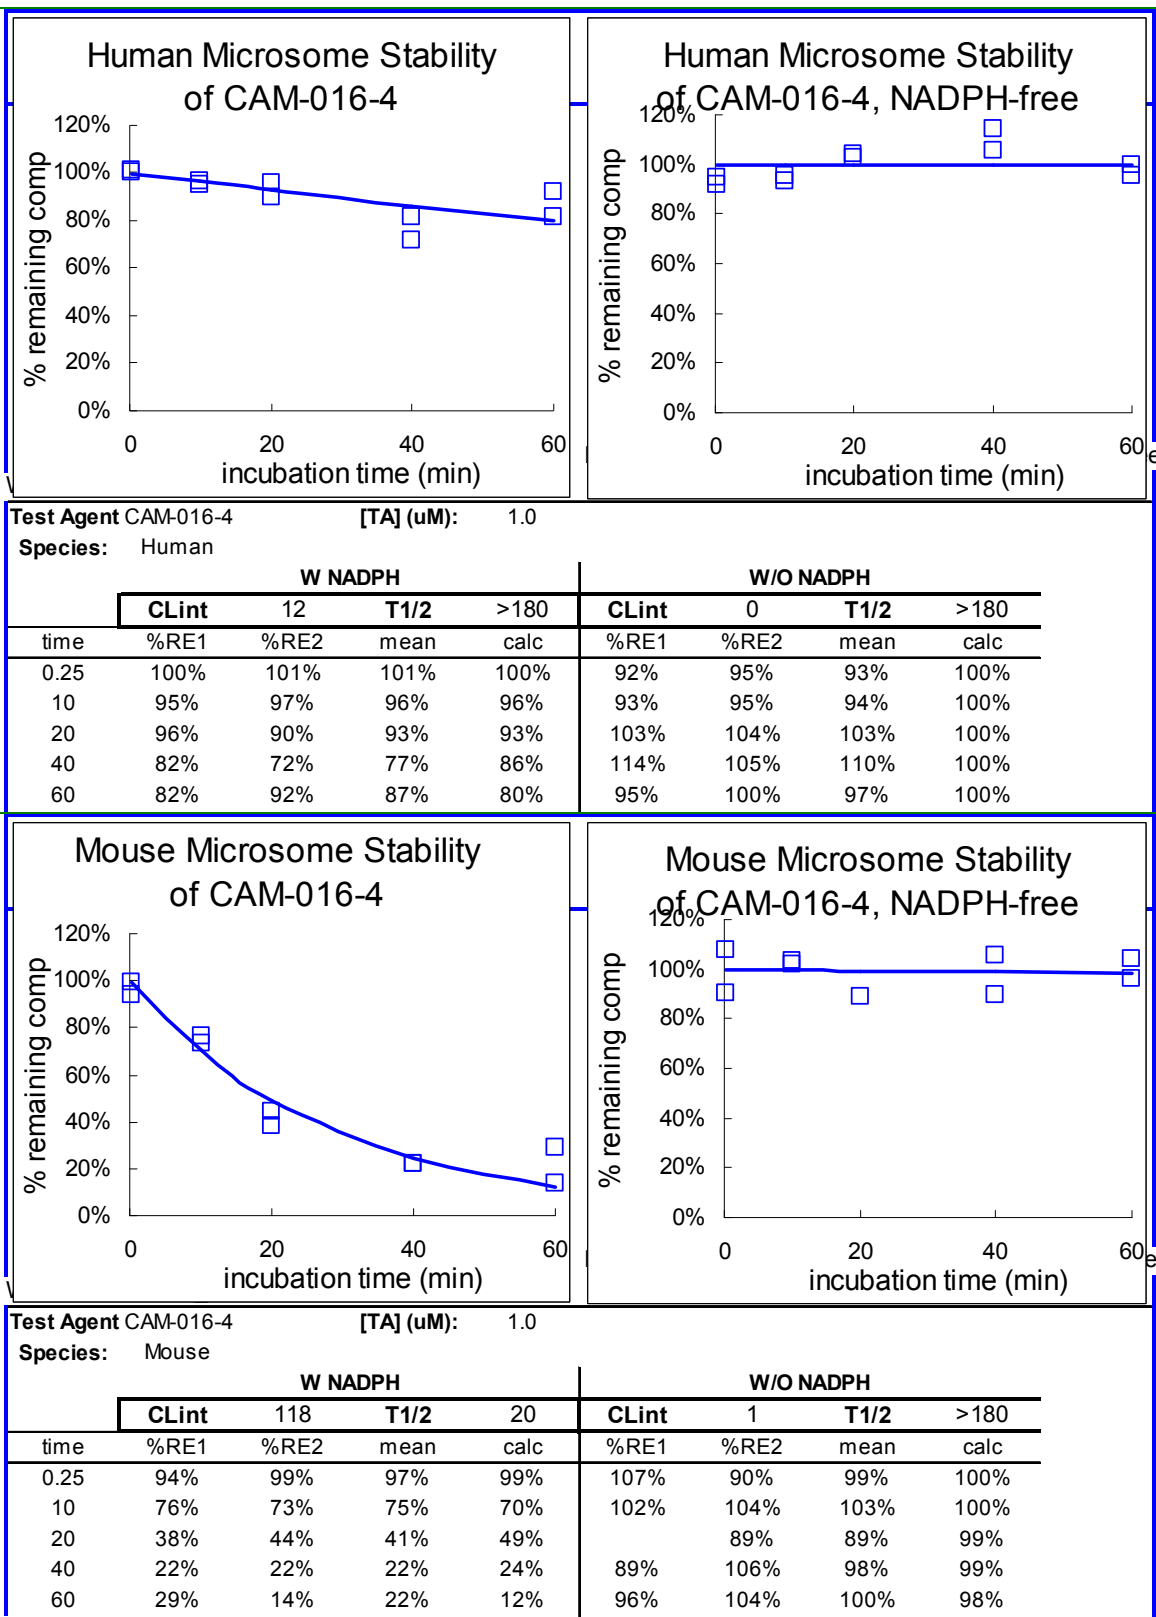

Note: Missing values represent unreliable data that was not used in the calculations.

## 5 References

Stewart, BH, *et al.* (1995) "Comparison of intestinal permeabilities determined in multiple *in vitro* and *in situ* models: Relationship to absorption in humans." *Pharm. Res.* 12:693.

Houston, JB (1994) "Utility of *in vitro* drug metabolism data in predicting *in vivo* metabolic clearance." *Biochem. Pharmacol.* 47:1469.

Singh, R, *et al.* (1996) "*In vitro* metabolism of a potent HIV-protease inhibitor (141W94) using rat, monkey and human liver S9." *Rapid Commun Mass Spectrom* 10:1019.



## **6 Storage and Retention of Records**

All documents generated in this study (raw data, the study plan, a copy of this report, etc.) will be stored for three years from the date of this document. Only authorized Apredica employees will have access to the archives.

The original final report will be provided to the sponsor and will be kept by the sponsor under its sole responsibility.

## 7 Appendices

### 7.1 Appendix A. Standard Aprecica Methods

#### PBS express solubility

Serial dilutions of test agent are prepared in test agent at 100x the final concentration. Test agent solutions are diluted 100-fold into PBS in a 96-well plate and mixed. The absorbance of the PBS-containing plate is measured prior to adding the test agents to determine the background absorbance. After 45 min and 16 hr, the presence of precipitate is then detected by turbidity (absorbance at 540 nm). An absorbance value of greater than (mean + 3x standard deviation of the blank), after subtracting the pre-experiment background, is indicative of turbidity. For brightly colored compounds, a visual inspection of the plate is performed to verify the solubility limit determined by UV absorbance. The solubility limit is reported as the highest experimental concentration with no evidence of turbidity.

#### Caco-2 monolayer permeability

CaCo-2 cells grown in tissue culture flasks are trypsinized, suspended in medium, and the suspensions were applied to wells of a collagen-coated BioCoat Cell Environment in 24-well format (BD Biosciences) at 24,500 cells per well. The cells are allowed to grow and differentiate for three weeks, feeding at 2-day intervals.

For Apical to Basolateral (A->B) permeability, the test agent is added to the apical (A) side and amount of permeation is determined on the basolateral (B) side; for Basolateral to Apical (B>A) permeability, the test agent is added to the B side and the amount of permeation is determine on the A side. The A-side buffer contains 100 µM Lucifer yellow dye, in Transport Buffer (1.98 g/L glucose in 10 mM HEPES, 1x Hank's Balanced Salt Solution) pH 6.5, and the B-side buffer is Transport Buffer, pH 7.4. CaCo-2 cells are incubated with these buffers for 2 h., and the receiver side buffer is removed for analysis by LC/MS/MS.

To verify the CaCo-2 cell monolayers are properly formed, aliquots of the cell buffers are analyzed by fluorescence to determine the transport of the impermeable dye Lucifer Yellow.

Data are expressed as permeability ( $P_{app}$ ): 
$$P_{app} = \frac{dQ/dt}{C_0 A}$$

where  $dQ/dt$  is the rate of permeation,  $C_0$  is the initial concentration of test agent, and  $A$  is the area of the monolayer.

In bidirectional permeability studies, the asymmetry index (AI) is also calculated:

$$AI = \frac{P_{app}(B \rightarrow A)}{P_{app}(A \rightarrow B)}$$

An AI > 1 indicated a potential substrate for PGP or other active transporters.

#### Buffer half-life

The test agent is incubated in duplicate with test medium at 37 °C. The reaction contains medium and 2% DMSO. At the indicated times, an aliquot is removed from each experimental reaction and mixed with three volumes of ice-cold Stop Solution (methanol containing propranolol, diclofenac, or other internal standard). Stopped reactions are incubated at least ten minutes at -20 °C. The samples are centrifuged to remove any precipitate, and the supernatants are analyzed by LC/MS/MS to quantitate the remaining

parent. Data are converted to % remaining by dividing by the time zero concentration value. Data are fit to a first-order decay model to determine half-life.

### **Plasma half-life**

The test agent is incubated in duplicate with plasma at 37 °C. The reaction contains plasma and 2% DMSO. At the indicated times, an aliquot is removed from each experimental reaction and mixed with three volumes of ice-cold Stop Solution (methanol containing propranolol, diclofenac, or other internal standard). Stopped reactions are incubated at least ten minutes at -20 °C. The samples are centrifuged to remove precipitated protein, and the supernatants are analyzed by LC/MS/MS to quantitate the remaining parent. Data are converted to % remaining by dividing by the time zero concentration value. Data are fit to a first-order decay model to determine half-life.

### **Microsomal intrinsic clearance**

The test agent is incubated in duplicate with microsomes at 37 °C. The reaction contains microsomal protein in 100 mM potassium phosphate, 2 mM NADPH, 3 mM MgCl<sub>2</sub>, pH 7.4. A control is run for each test agent omitting NADPH to detect NADPH-free degradation. The indicated times, an aliquot is removed from each experimental and control reaction and mixed with an equal volume of ice-cold Stop Solution (0.3% acetic acid in acetonitrile containing haloperidol, diclofenac, or other internal standard). Stopped reactions are incubated at least ten minutes at -20 °C, and an additional volume of water is added. The samples are centrifuged to remove precipitated protein, and the supernatants are analyzed by LC/MS/MS to quantitate the remaining parent. Data are converted to % remaining by dividing by the time zero concentration value. Data are fit to a first-order decay model to determine half-life. Intrinsic clearance is calculated from the half-life and the protein concentrations:  $CL_{int} = \ln(2) / (T_{1/2} [\text{microsomal protein}])$ .

## 7.2 Appendix B. Sample Spectra and Chromatograms of the Test Agents

21805 (1) MS2 Full Spectrum Scan

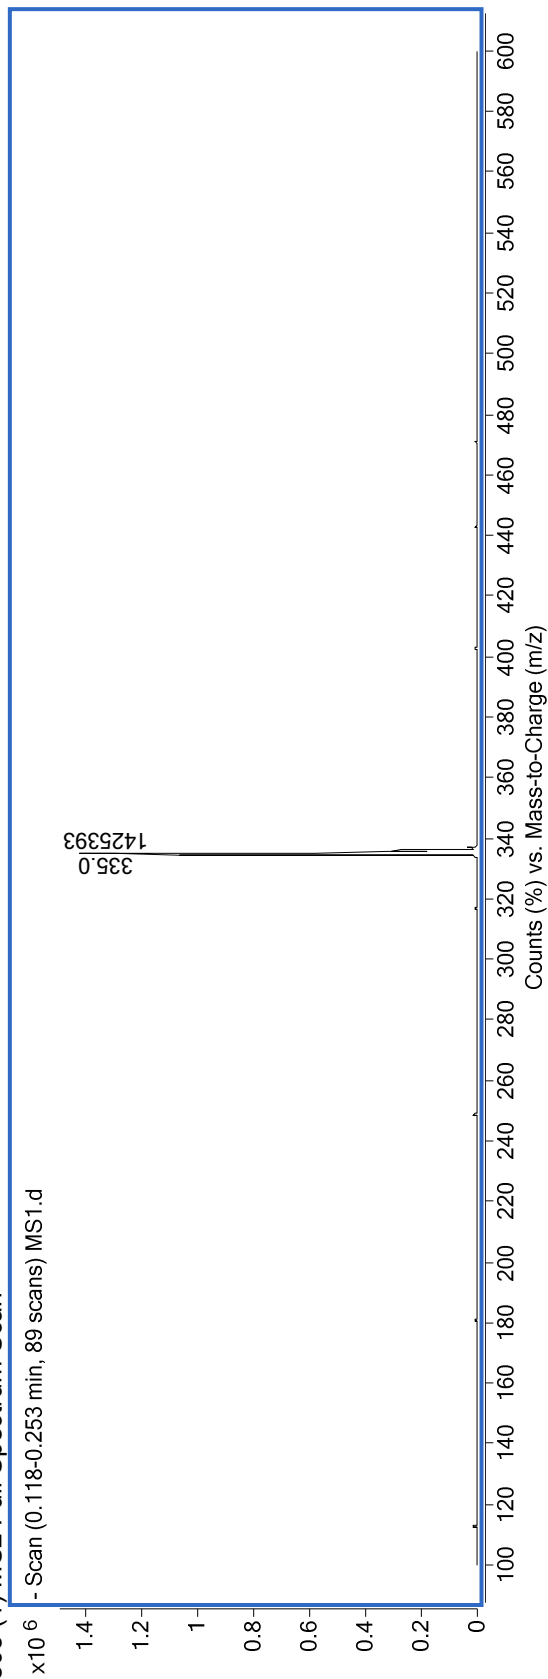

21805 (1) Product Ion Scan

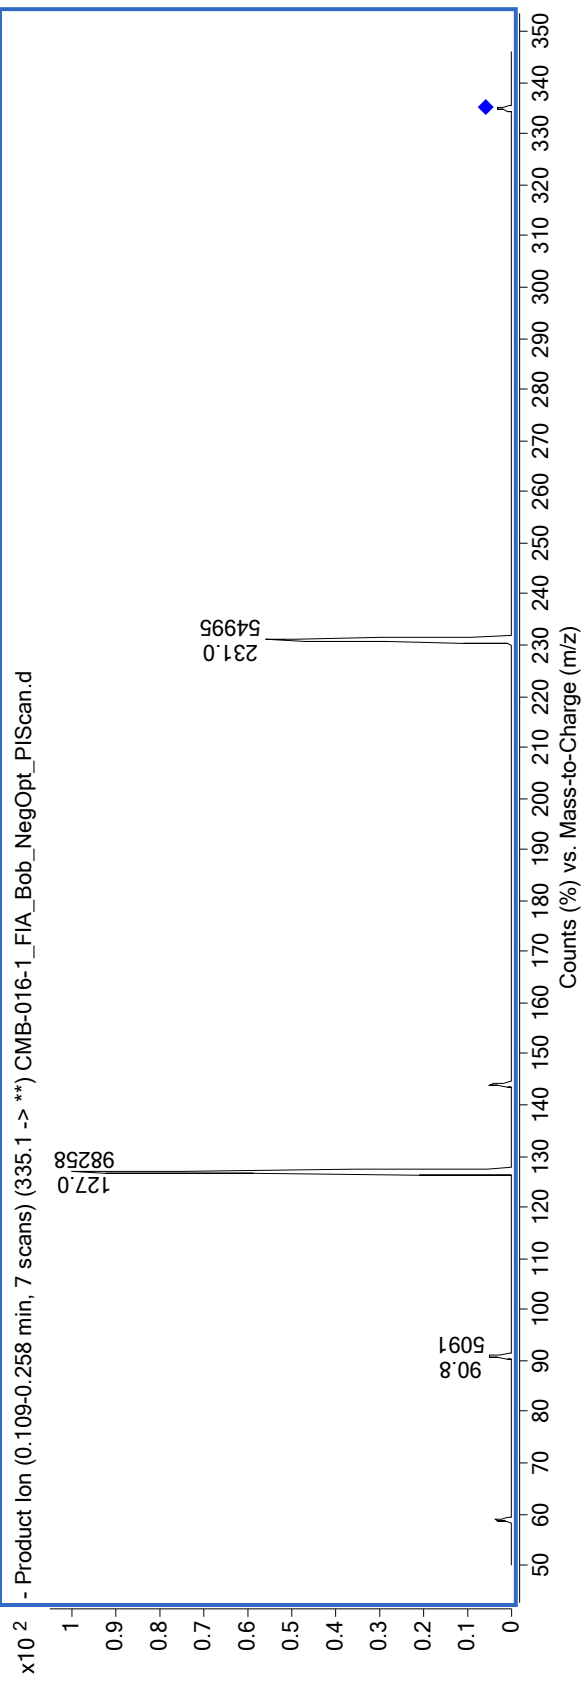

### 21805 (1) Sample Chromatogram

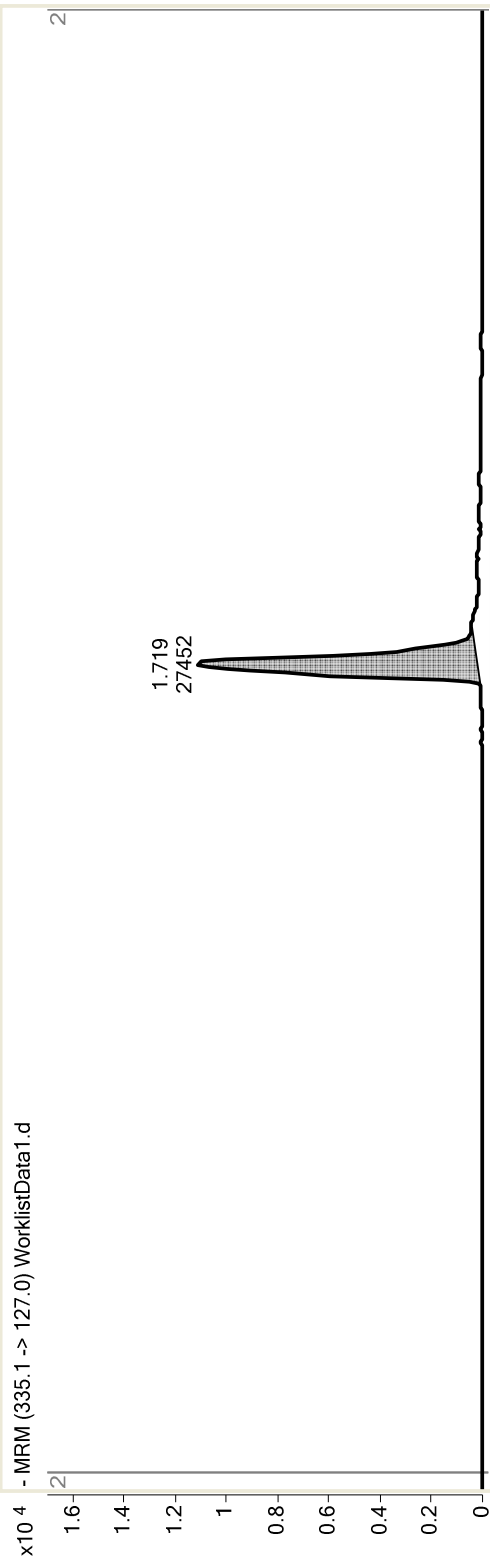

### - MRM (335.1 -> 231.1) WorklistData1.d

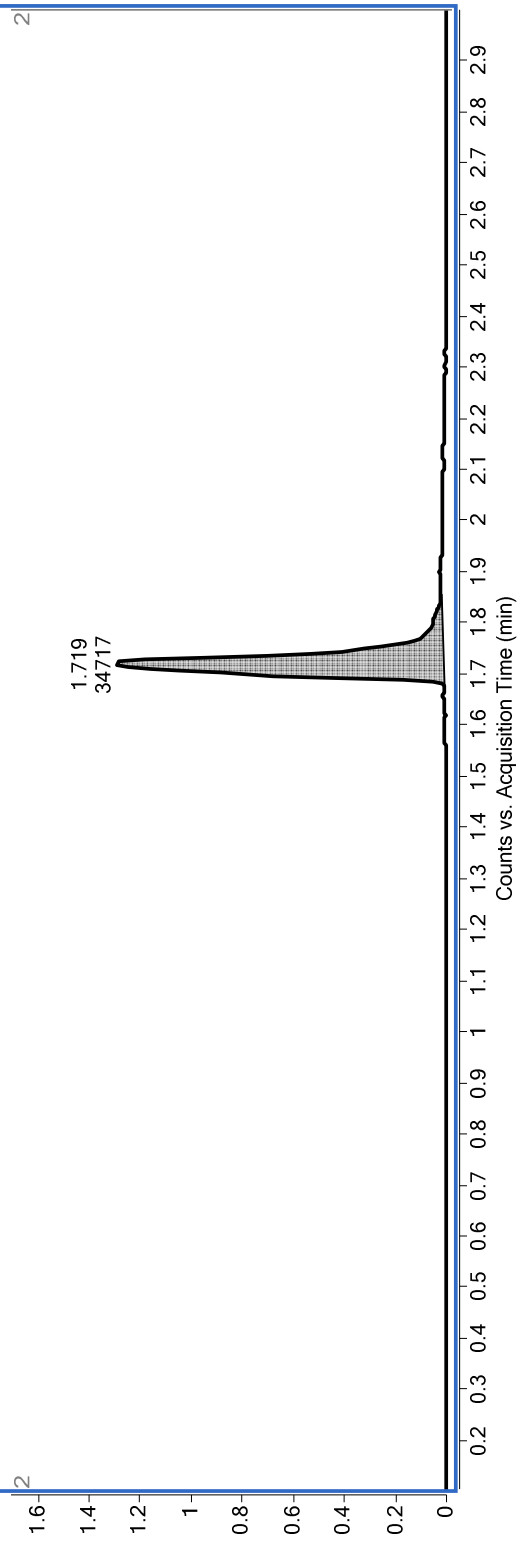

(2) MS2 Full Spectrum Scan

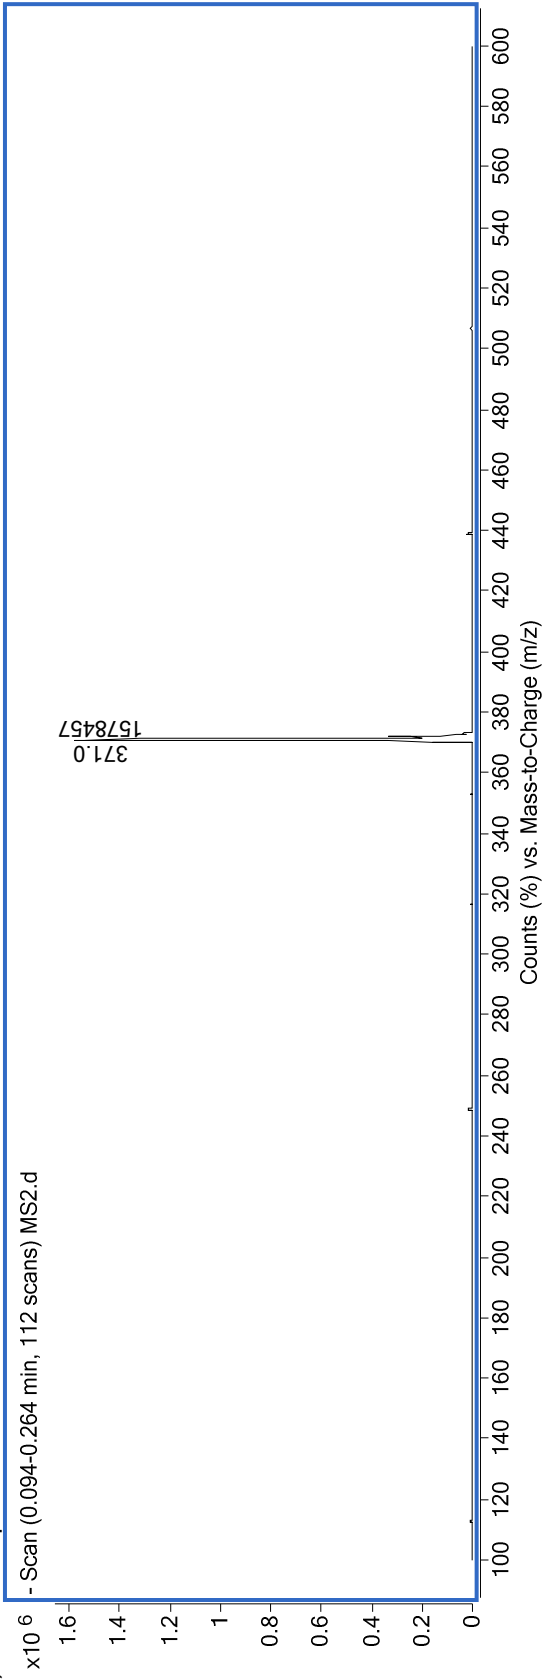

(2) Product Ion Scan

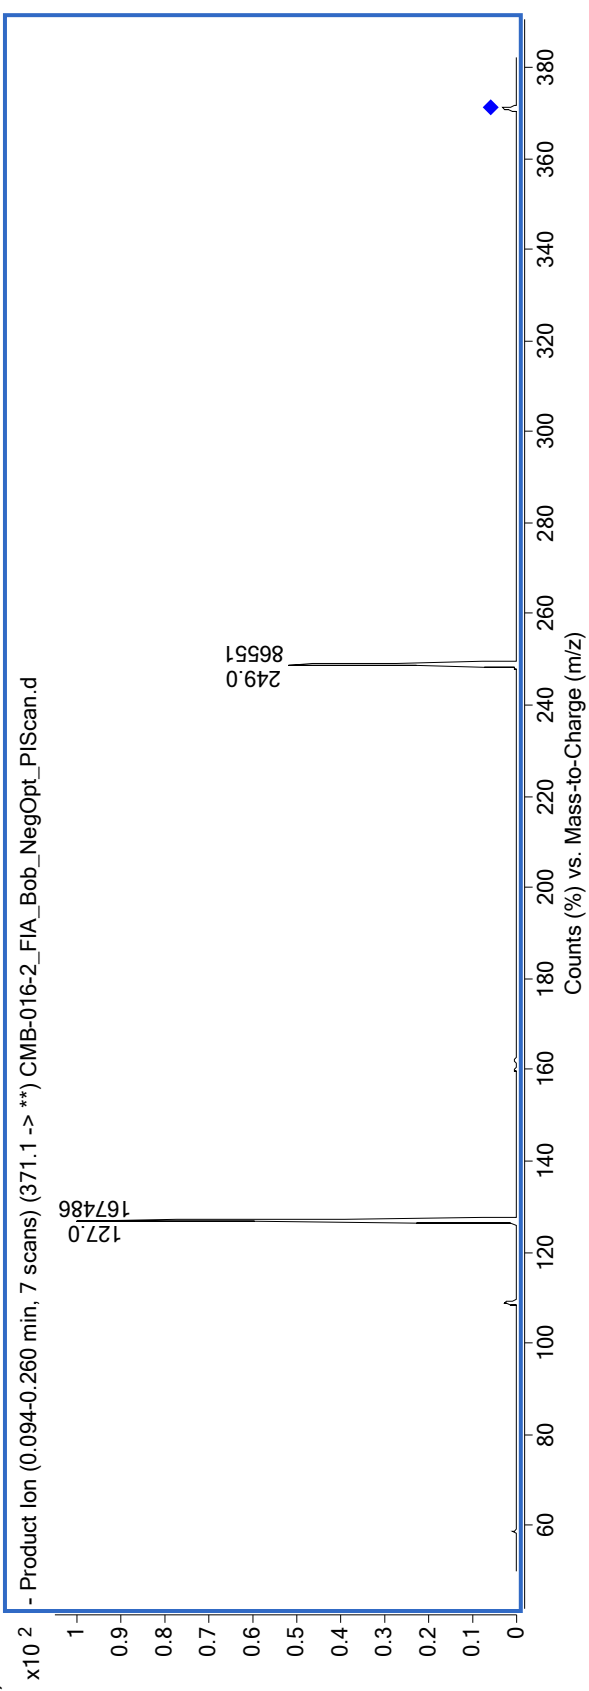



(2) Sample Chromatogram

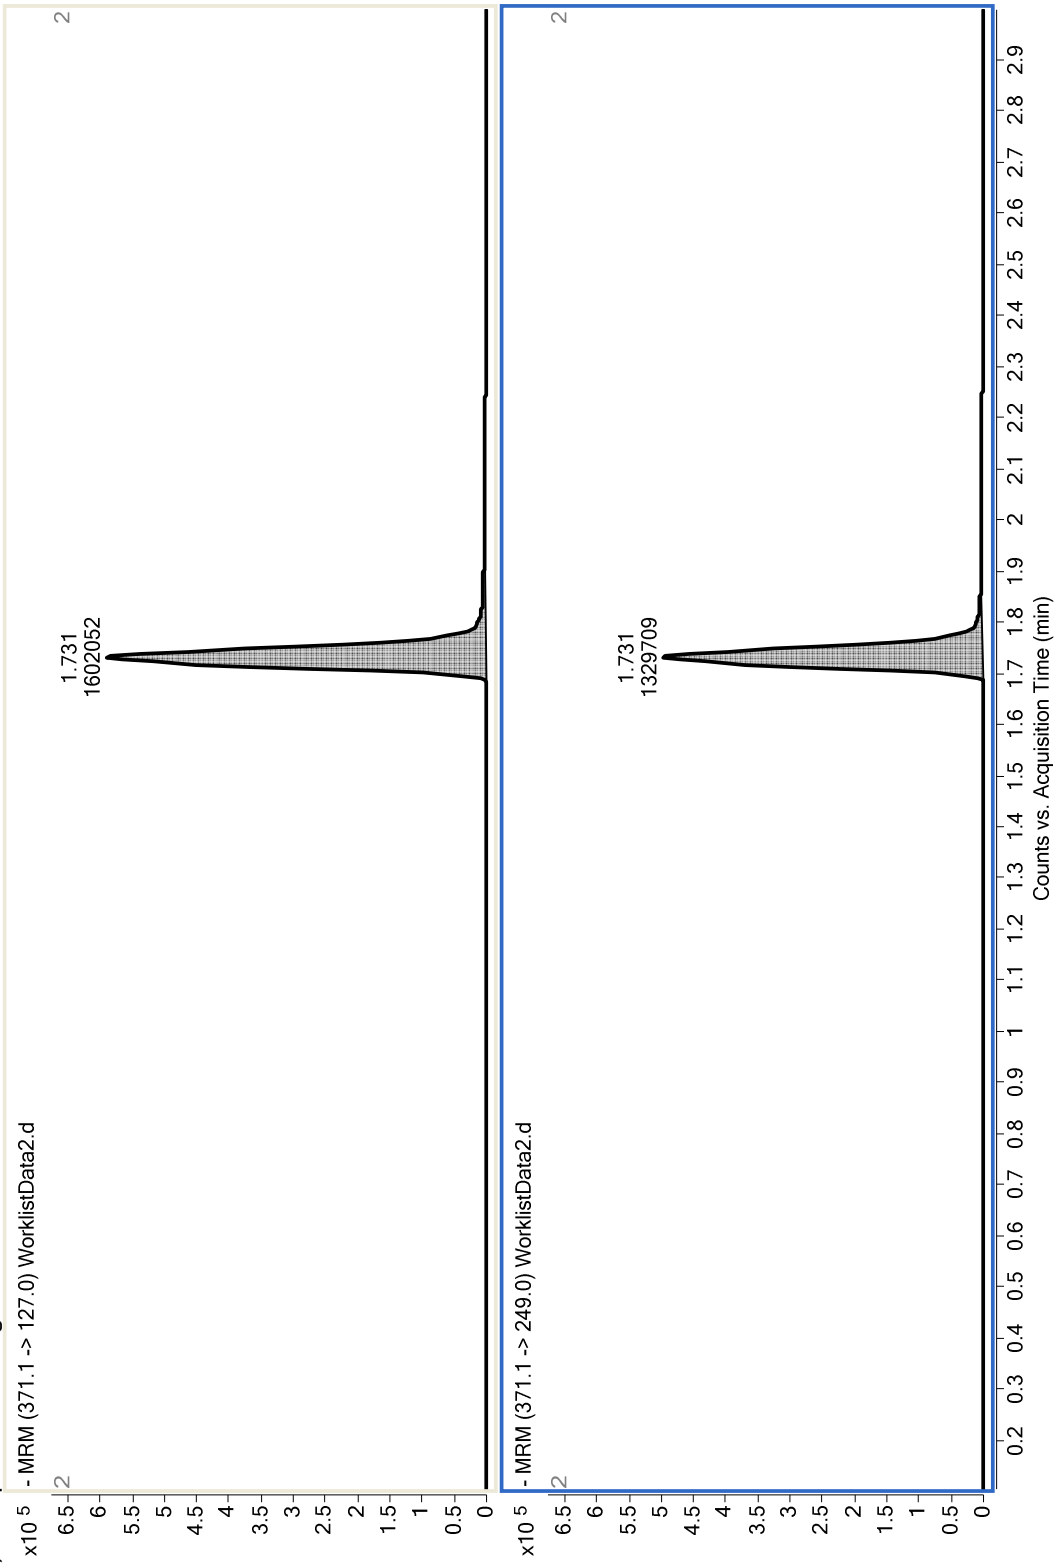

(3) MS2 Full Spectrum Scan

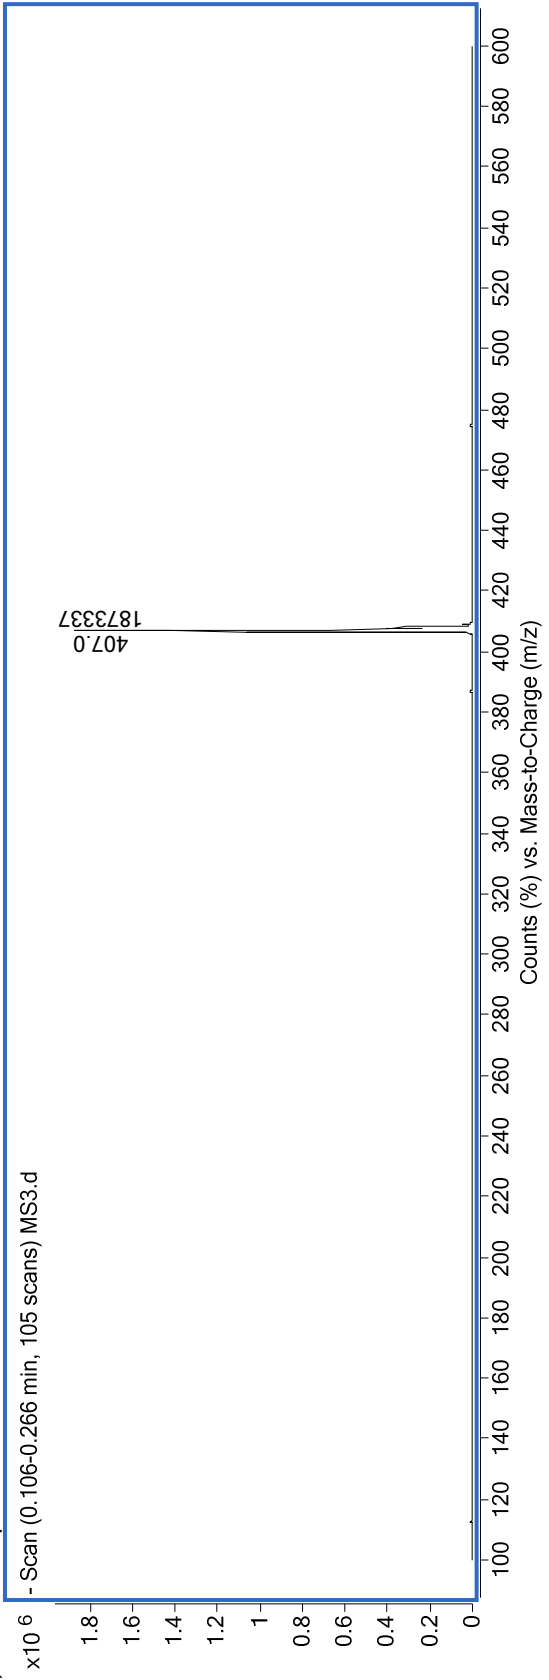

(3) Product Ion Scan

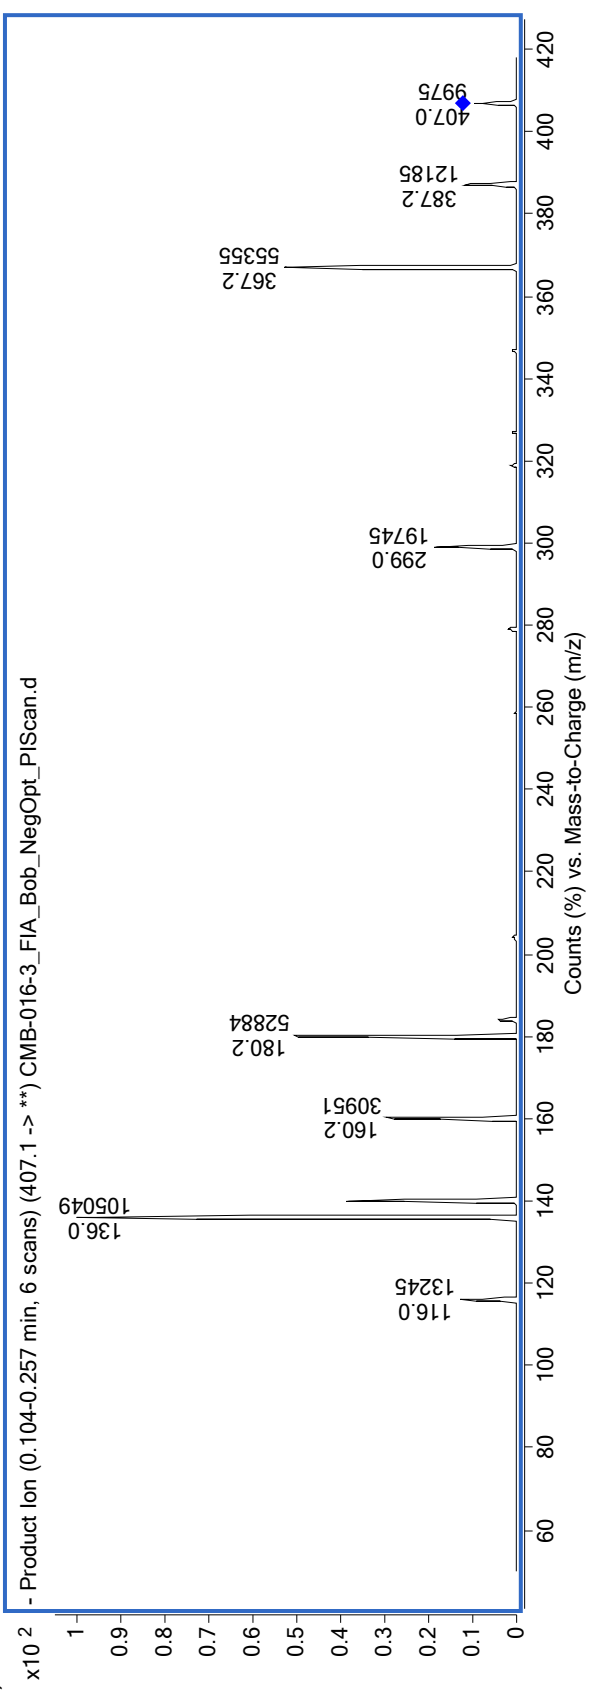

(3) Sample Chromatogram

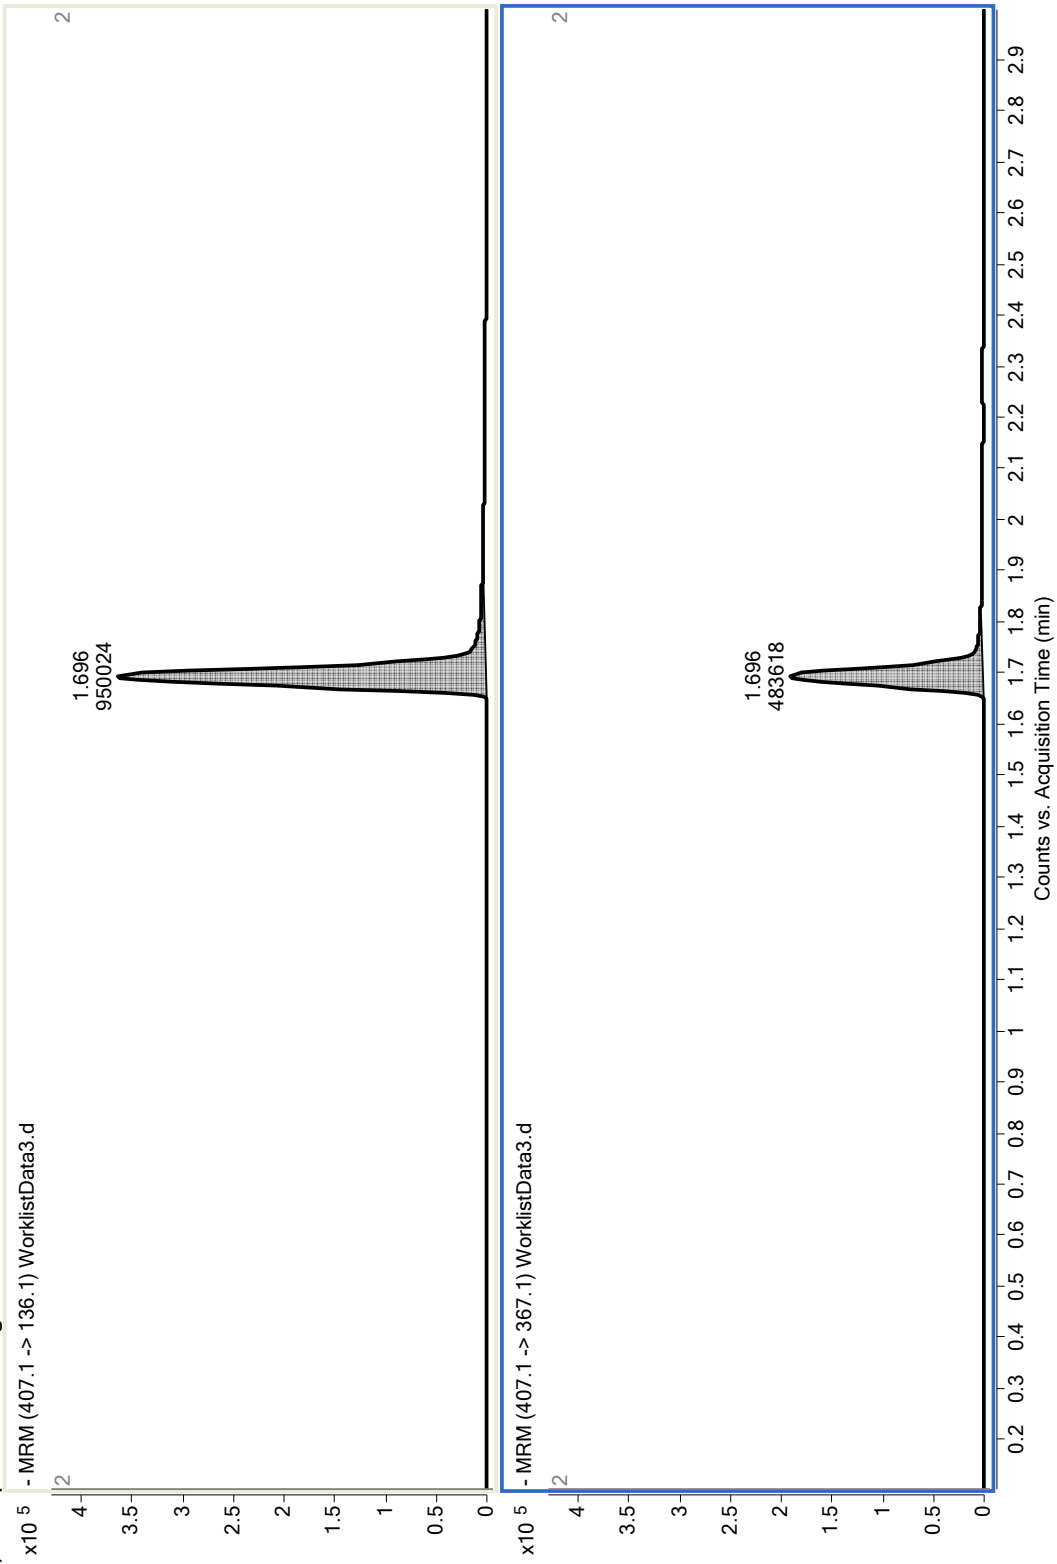

(4) MS2 Full Spectrum Scan

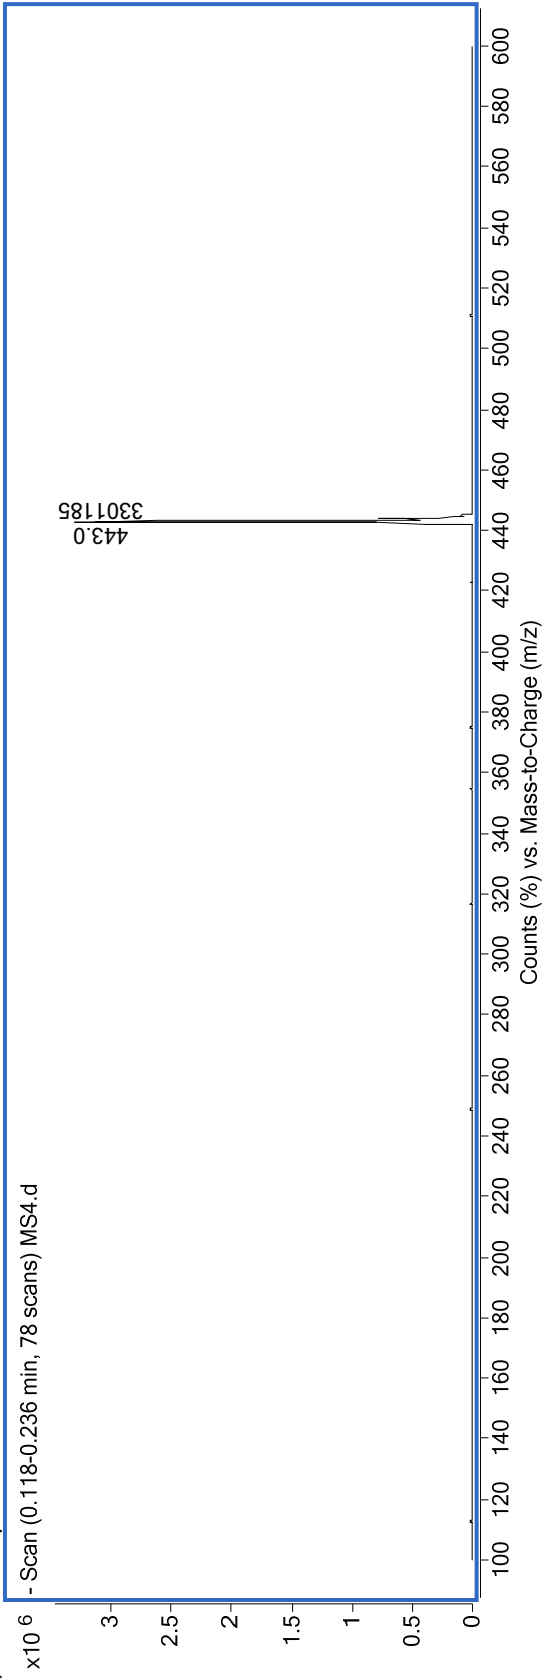

(4) Product Ion Scan

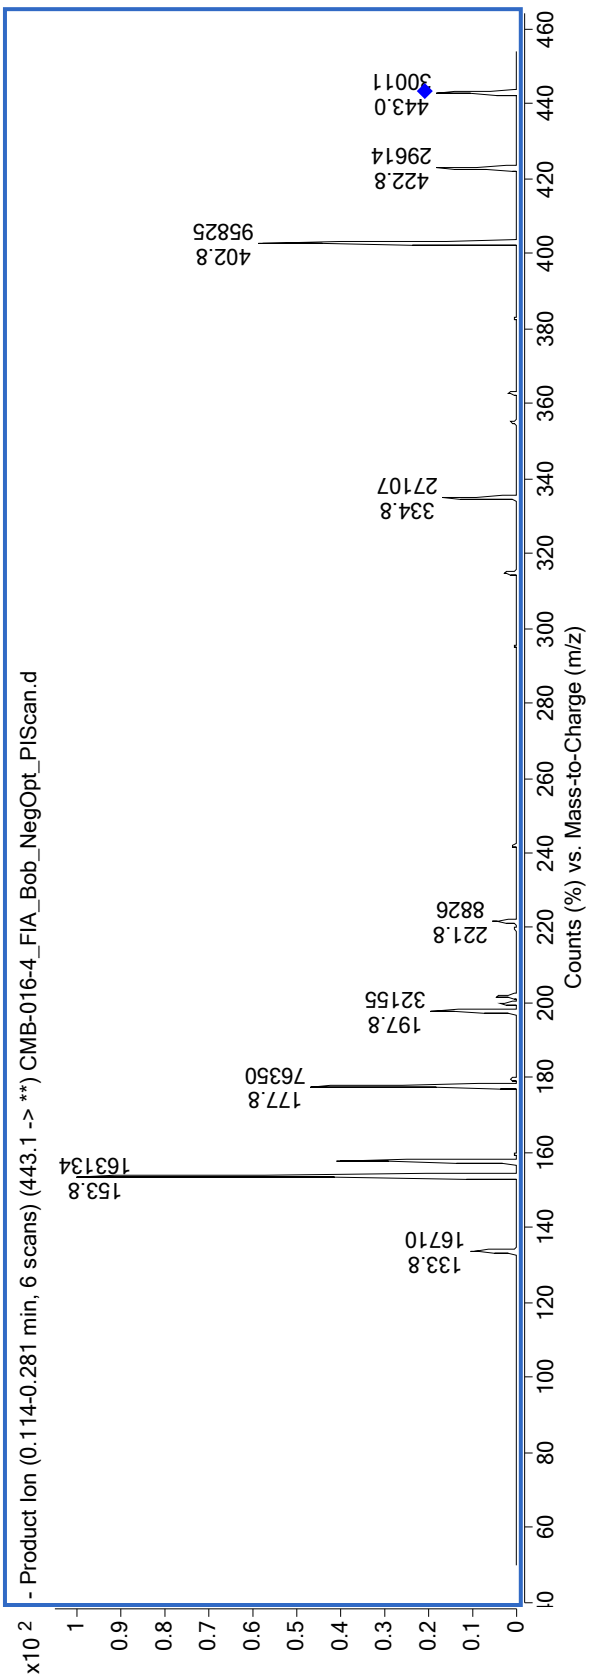

(4) Sample Chromatogram

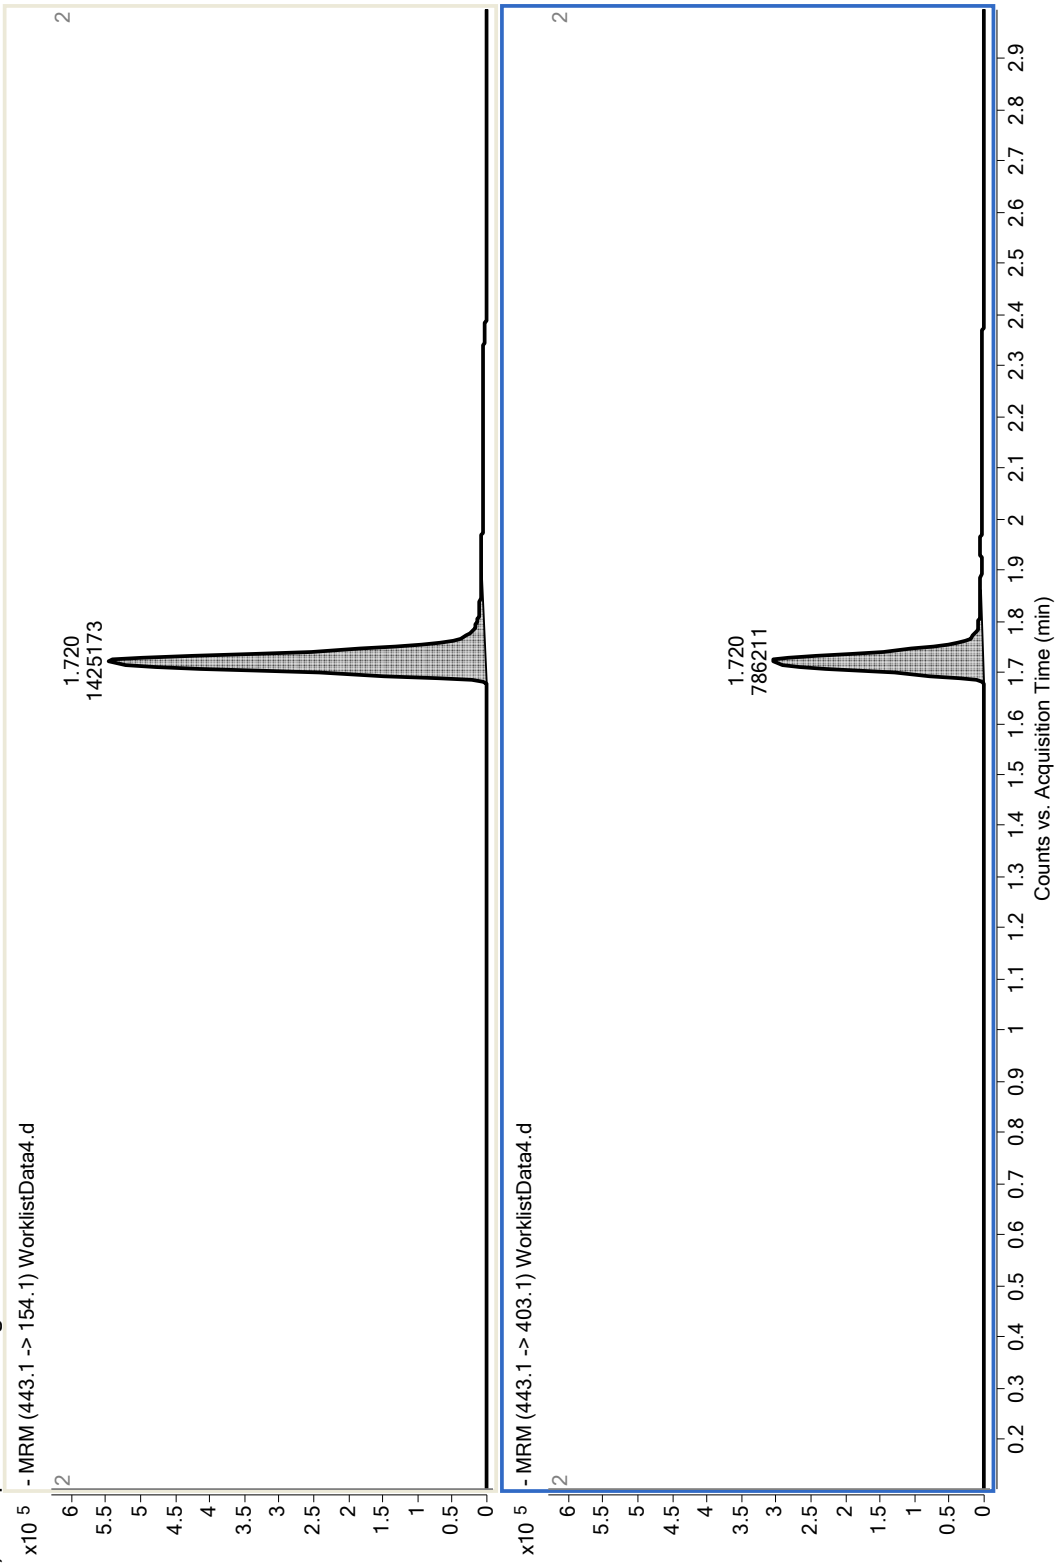

Supplement: NIHMS627115-supplement.pdf [file NIHMS627115-supplement.pdf]
